# Supplementary material for: Furanocoumarins from Ruta chalepensis with Amebicide Activity
Source: MDPI journal article supplement (doi:10.3390/molecules26123684), 2021-06-16
Supplement: s1 [file s1]

## Furanocoumarins from *Ruta chalepensis* with amebicide activity

Aldo Fabio Bazaldúa-Rodríguez <sup>1</sup>, Ramiro Quintanilla-Licea <sup>1\*</sup>, Maria Julia Verde-Star <sup>1</sup>, Magda Elizabeth Hernández-García <sup>2</sup>, Javier Vargas-Villarreal <sup>3</sup>, Jesús Norberto Garza-González <sup>4</sup>.

<sup>1</sup>Universidad Autónoma de Nuevo León (UANL), Facultad de Ciencias Biológicas, Laboratorio de Fitoquímica, Av. Universidad S/N, Cd. Universitaria, San Nicolás de los Garza, C.P. 66455, Nuevo León, México

<sup>2</sup>Centro de Investigaciones Biomédicas del Noreste (CIBIN), Laboratorio de Fisiología Celular y Molecular, Dos de abril esquina con San Luis Potosí, Monterrey, C.P. 64720, Nuevo León, México

<sup>3</sup>Centro de Investigaciones Biomédicas del Noreste (CIBIN), Laboratorio de Biología y Fisiología Molecular y Celular, Dos de abril esquina con San Luis Potosí, Monterrey, C.P. 64720, Nuevo León, México

<sup>4</sup>Universidad de Monterrey, Av. Ignacio Morones Prieto 4500 Pte., San Pedro Garza García C.P. 66238, Nuevo León, México

**\*Corresponding author:**

Ramiro Quintanilla-Licea

[Ramiro.quintanillalc@uanl.edu.mx](mailto:Ramiro.quintanillalc@uanl.edu.mx); Tel. ++52-81-83579479

ORCID 0000-0002-4379-6913

# Spectroscopic analysis of Rutamarin 1

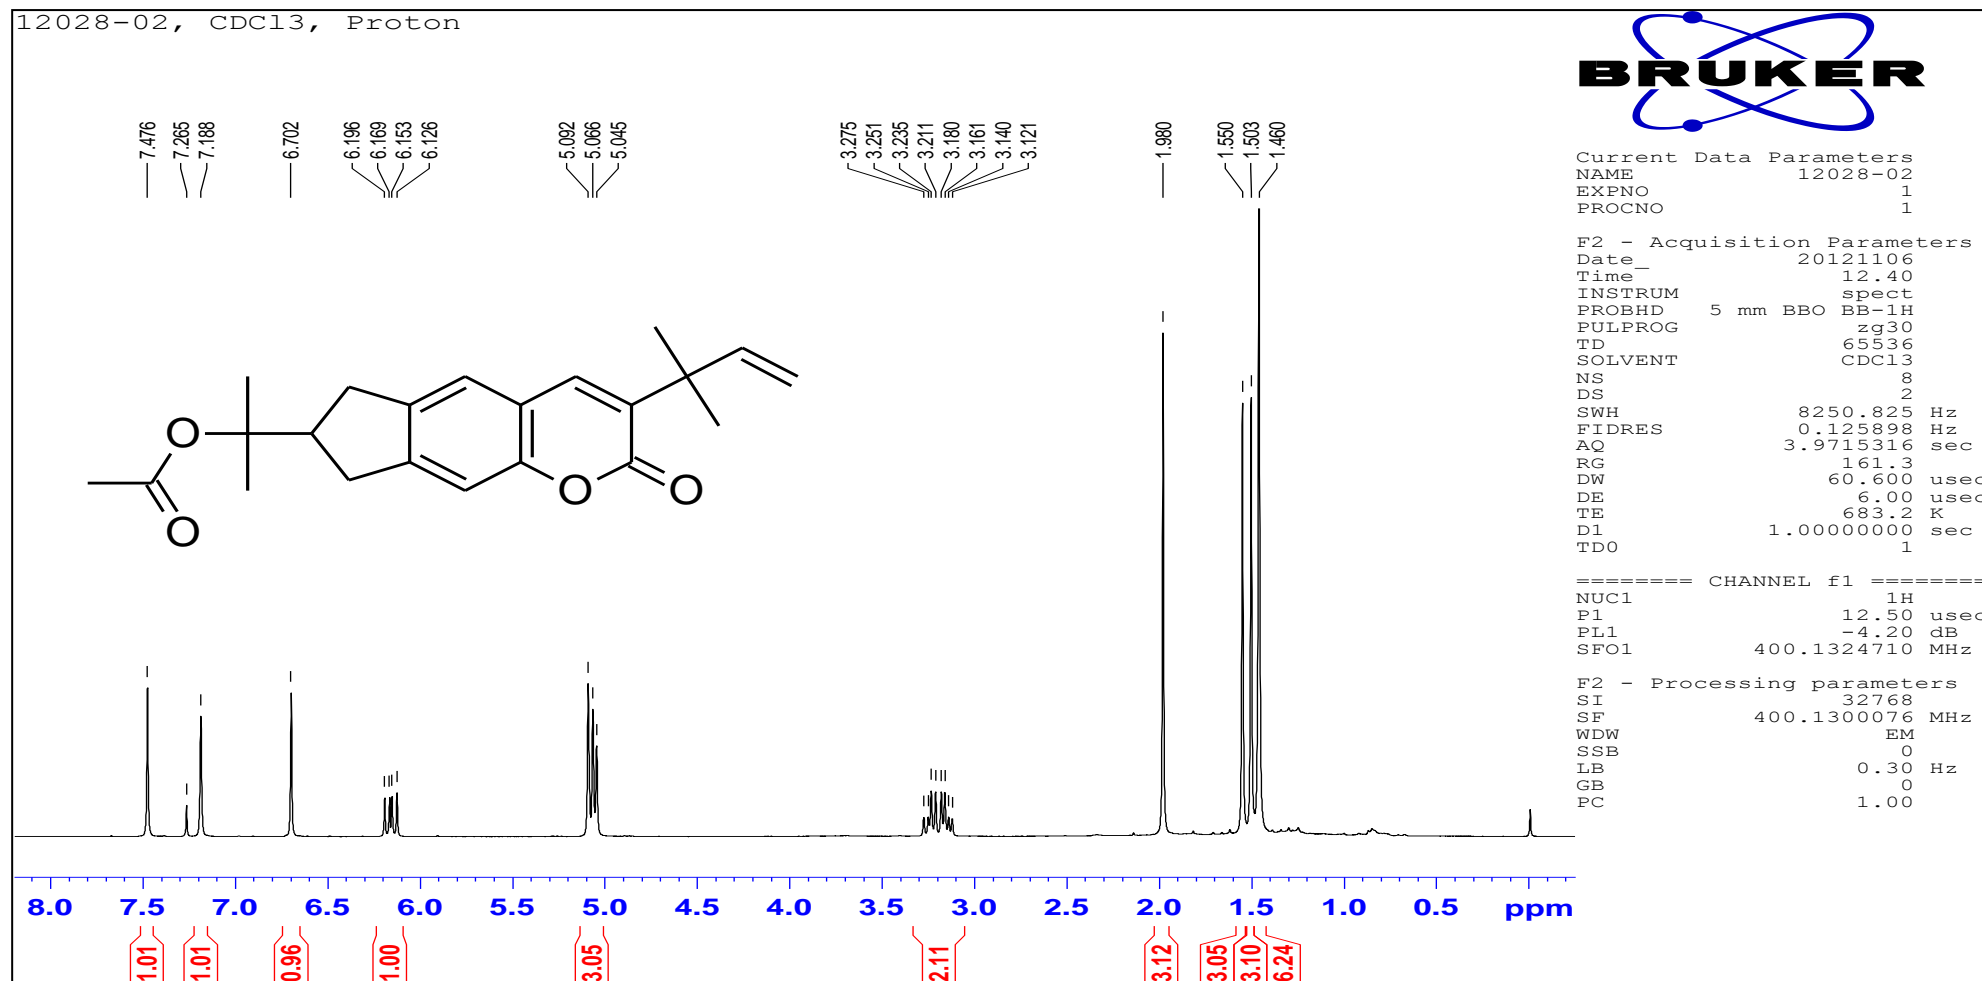

**Figure S1.** <sup>1</sup>H-NMR spectrum of **1**. Obtained by a Bruker Spectrometer Model Advance DPX400, 9.4 Teslas. Operating frequency 400 MHz. (CDCl<sub>3</sub>).

# Spectroscopic analysis of Rutamarin 1

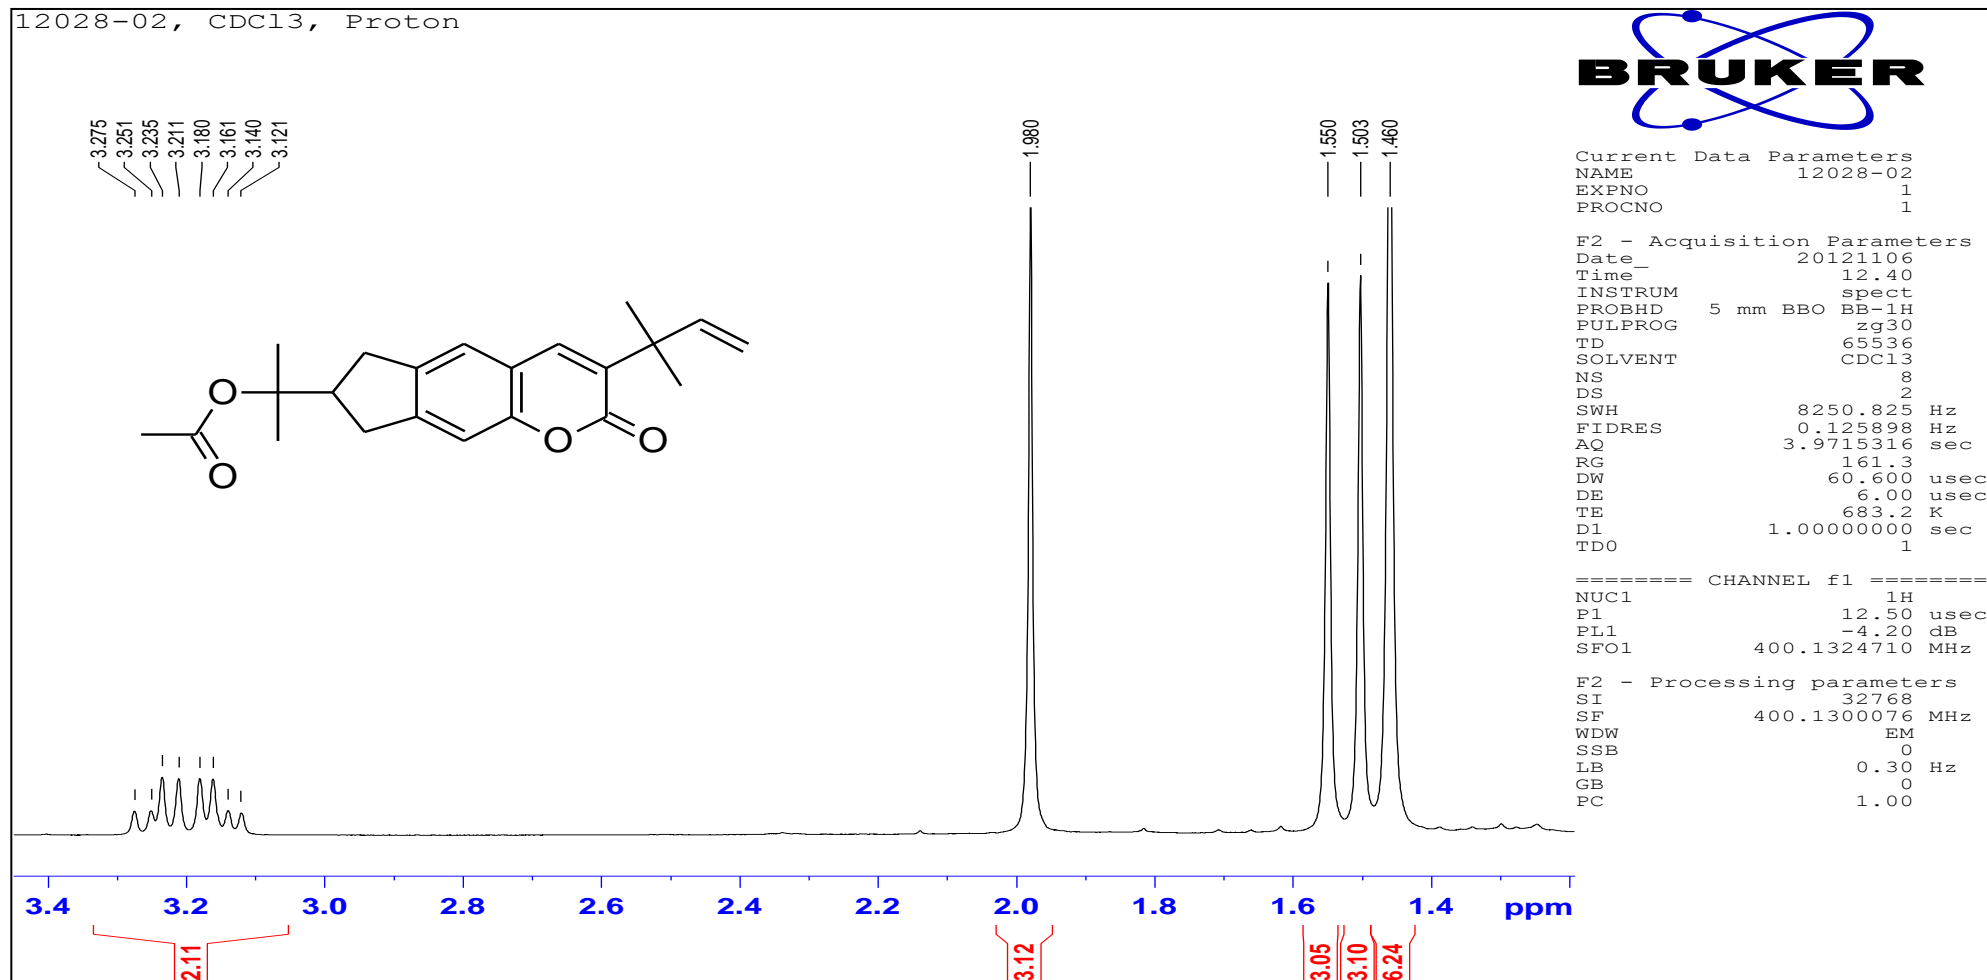

**Figure S2.** Expansion in the area from 1.2-3.4 ppm. <sup>1</sup>H-NMR spectrum of **1**. Obtained by a Bruker Spectrometer Model Advance DPX400, 9.4 Teslas. Operating frequency 400 MHz. (CDCl<sub>3</sub>).

# Spectroscopic analysis of Rutamarin 1

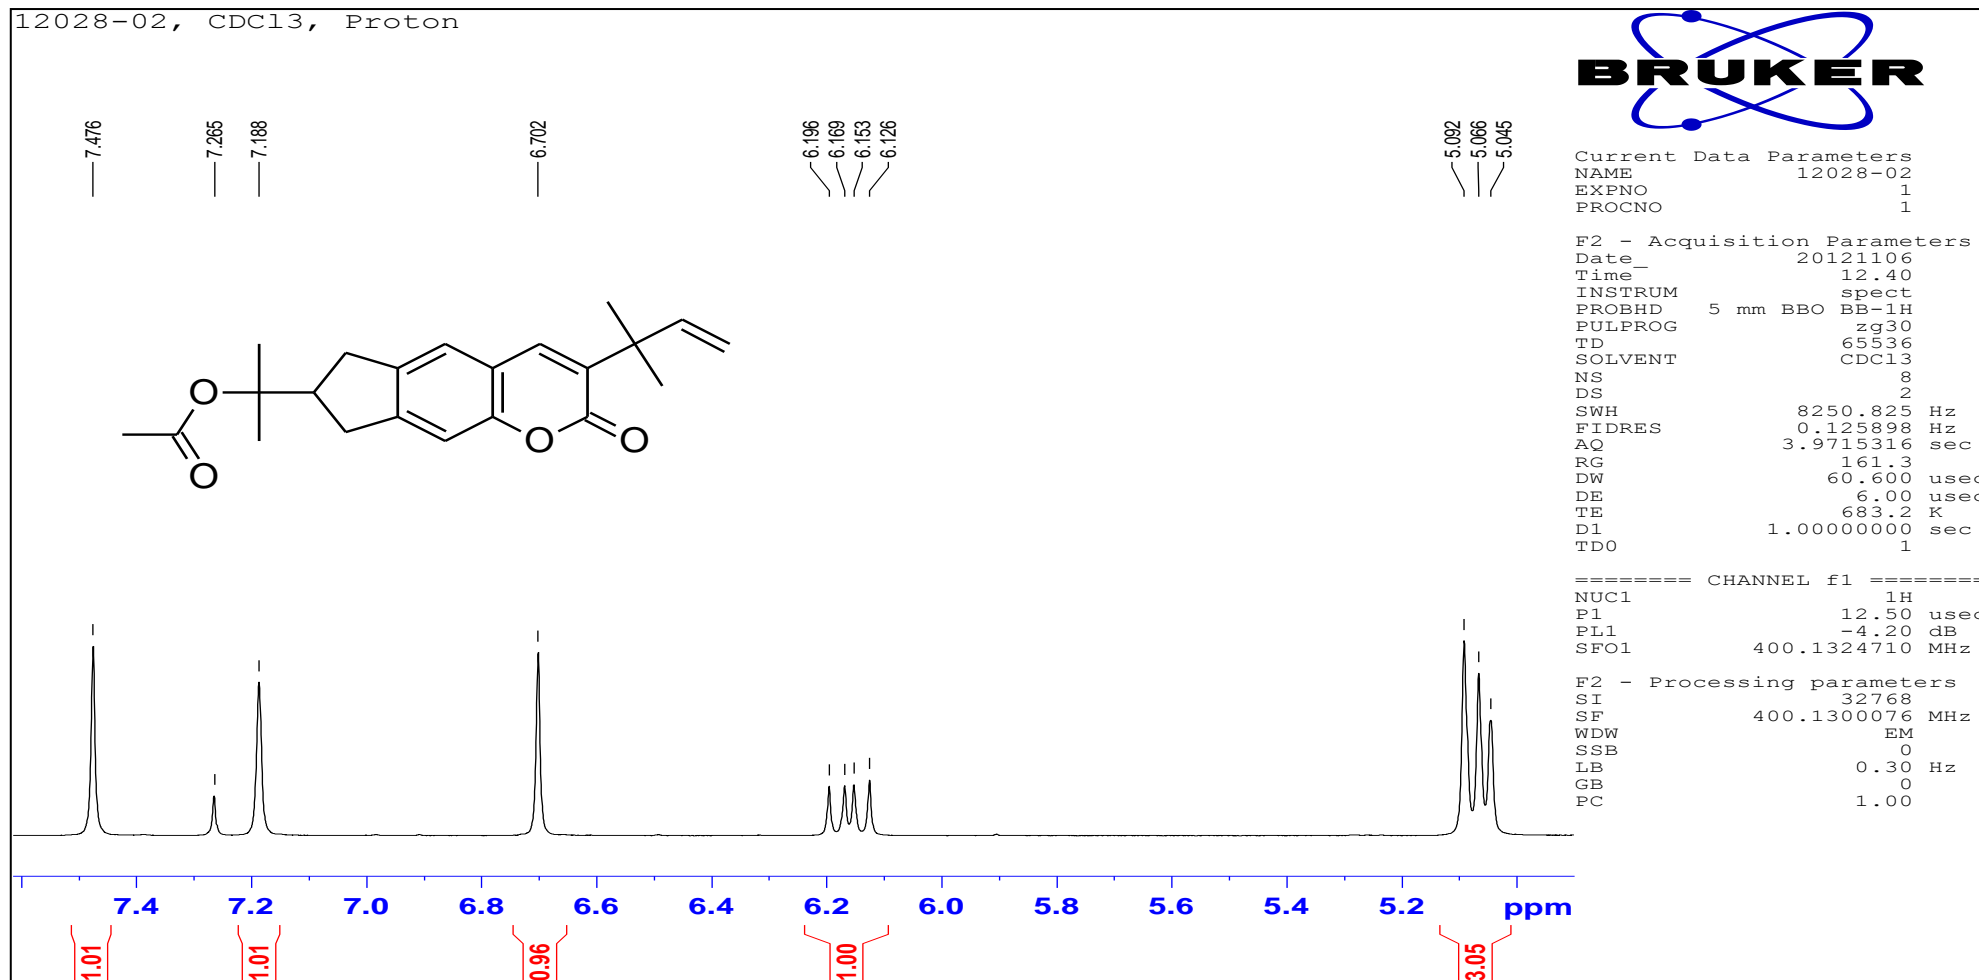

**Figure S3.** Expansion in the area from 4.8-7.6 ppm. <sup>1</sup>H-NMR spectrum of **1**. Obtained by a Bruker Spectrometer Model Advance DPX400, 9.4 Teslas. Operating frequency 400 MHz. (CDCl<sub>3</sub>).

# Spectroscopic analysis of Rutamarin 1

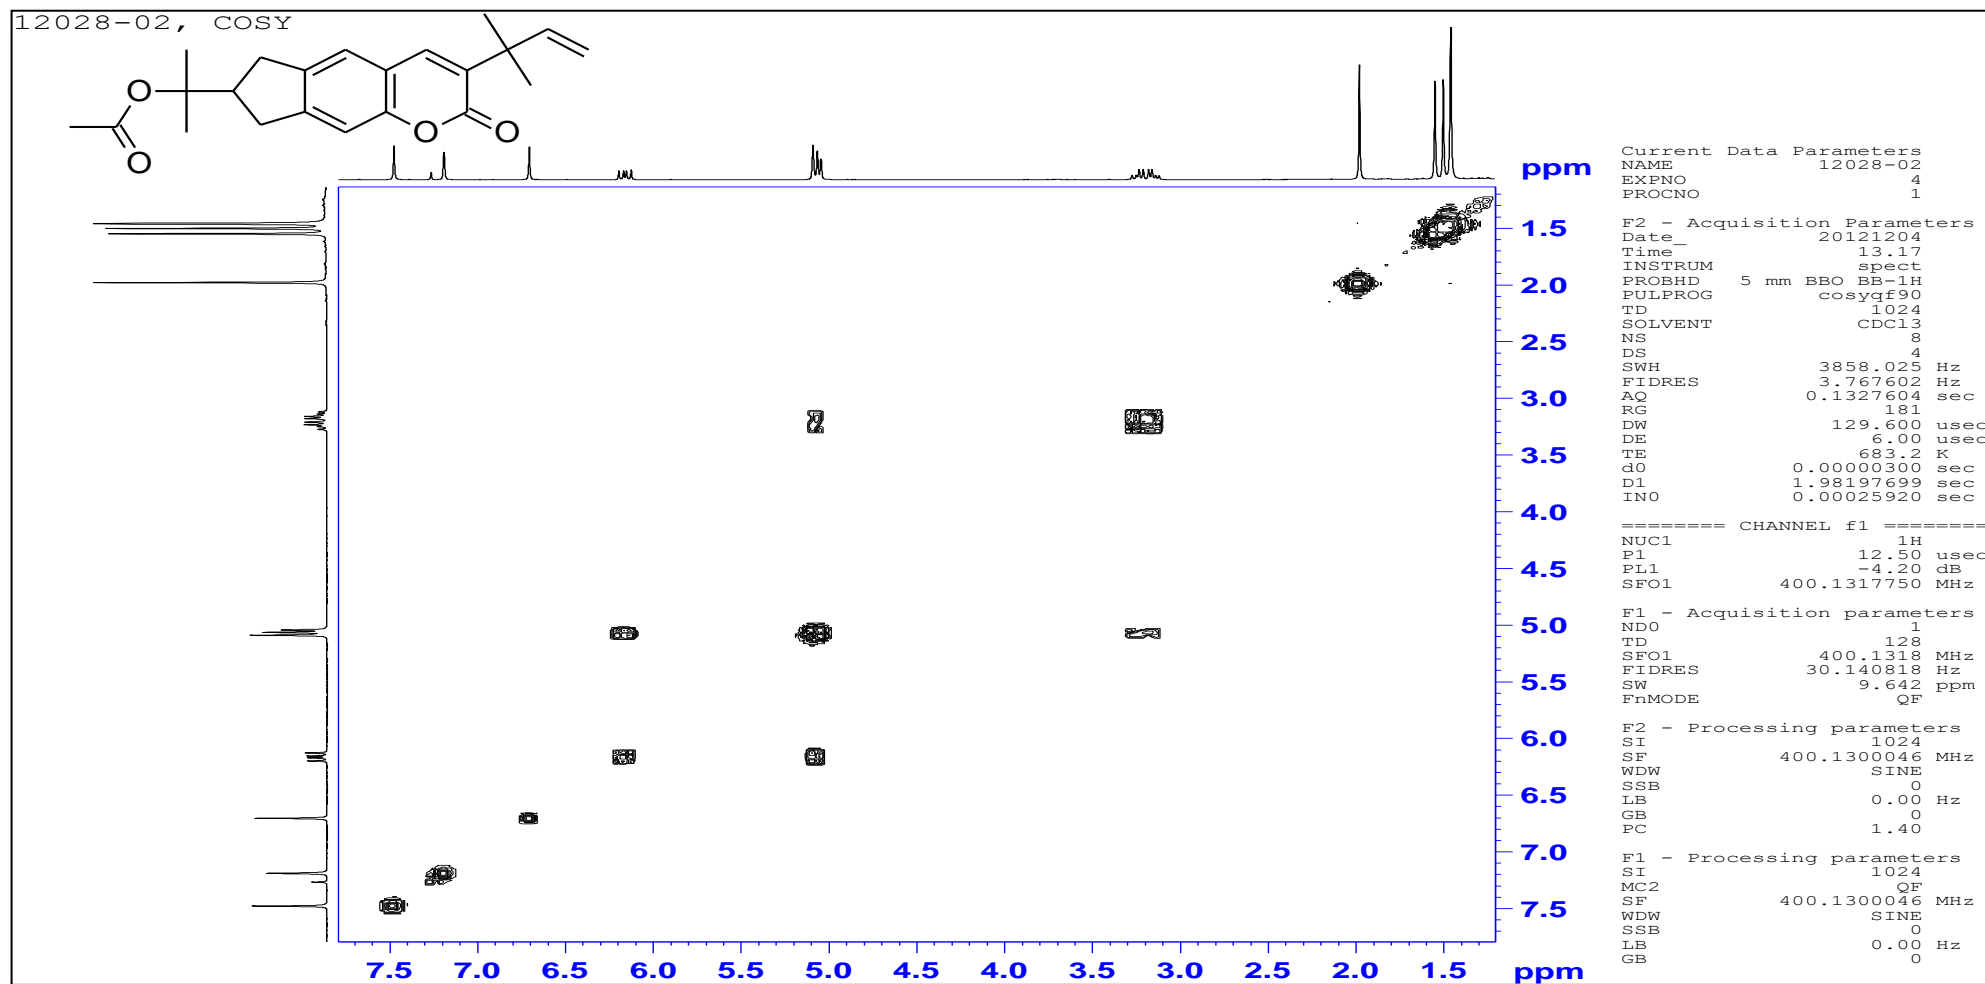

**Figure S4.** COSY spectrum of 1. Obtained by a Bruker Spectrometer Model Advance DPX400, 9.4 Teslas. Operating frequency 400 MHz.(CDCl<sub>3</sub>).

# Spectroscopic analysis of Rutamarin 1

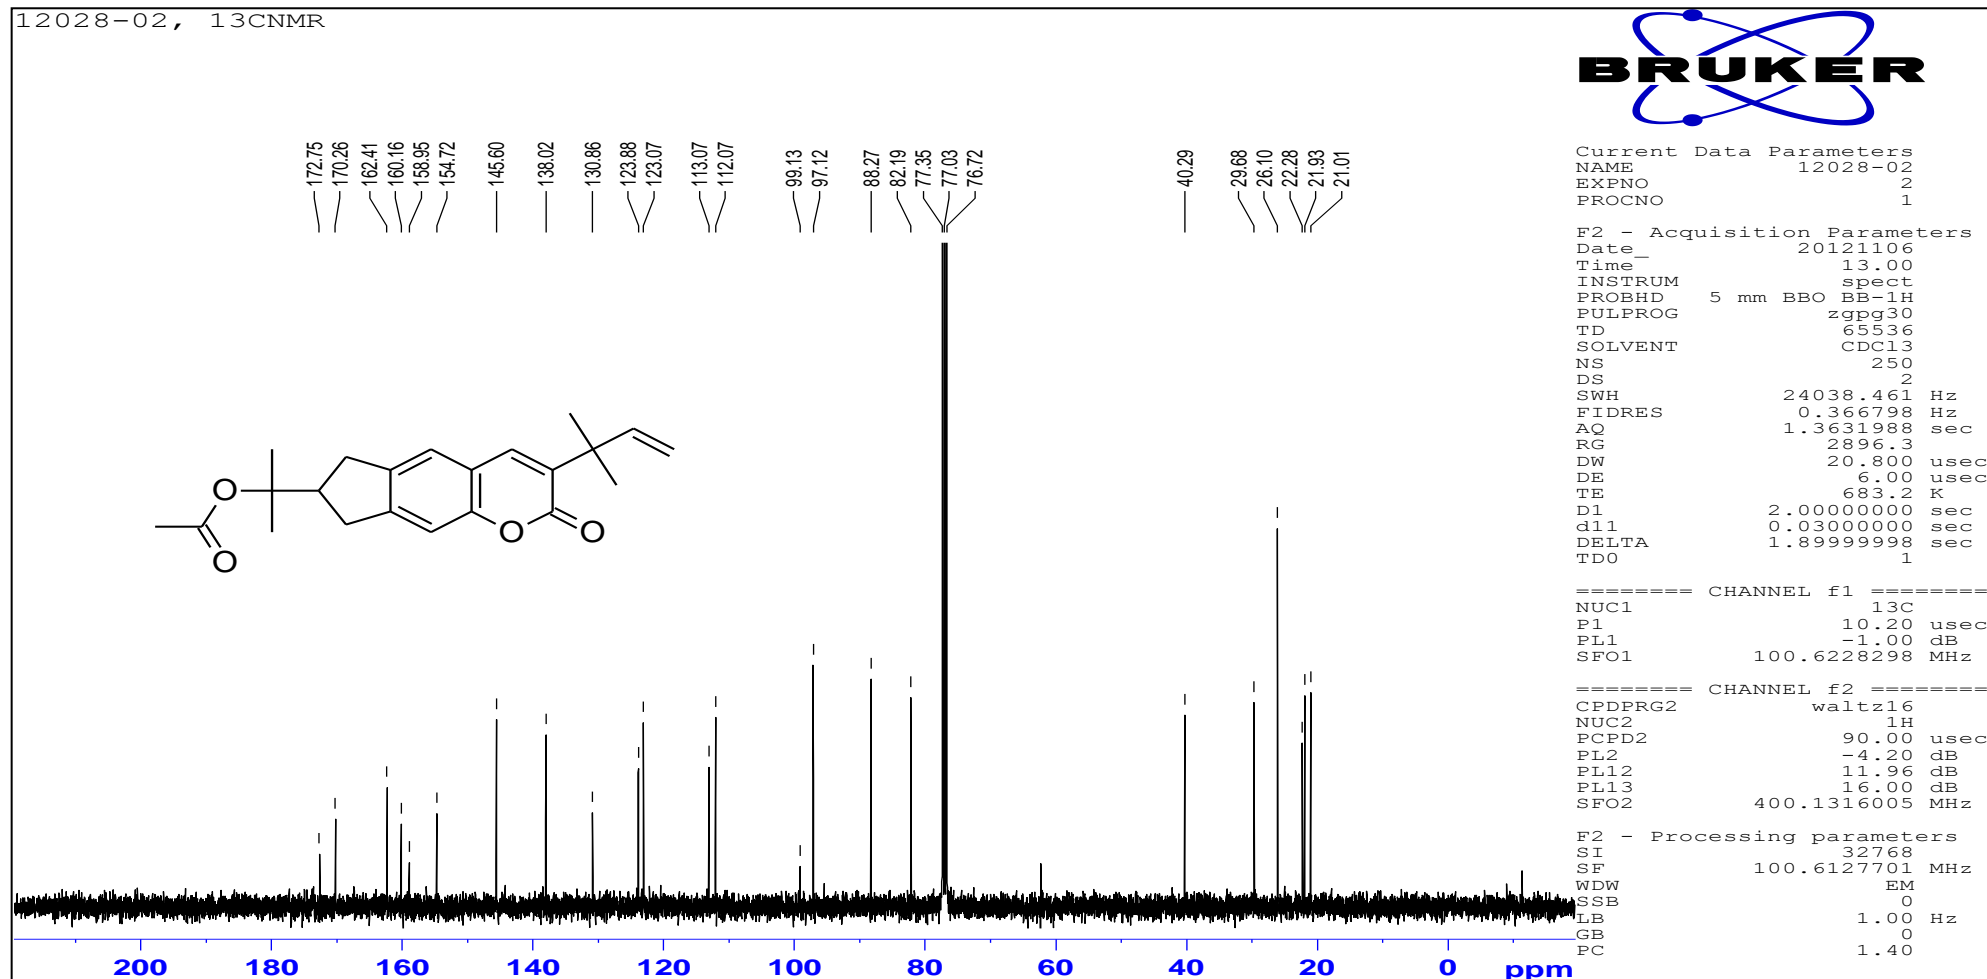

**Figure S5.** <sup>13</sup>C-NMR spectrum of 1. Obtained by a Bruker Spectrometer Model Advance DPX400, 9.4 Teslas. Operating frequency 100 MHz. (CDCl<sub>3</sub>).

# Spectroscopic analysis of Rutamarin 1

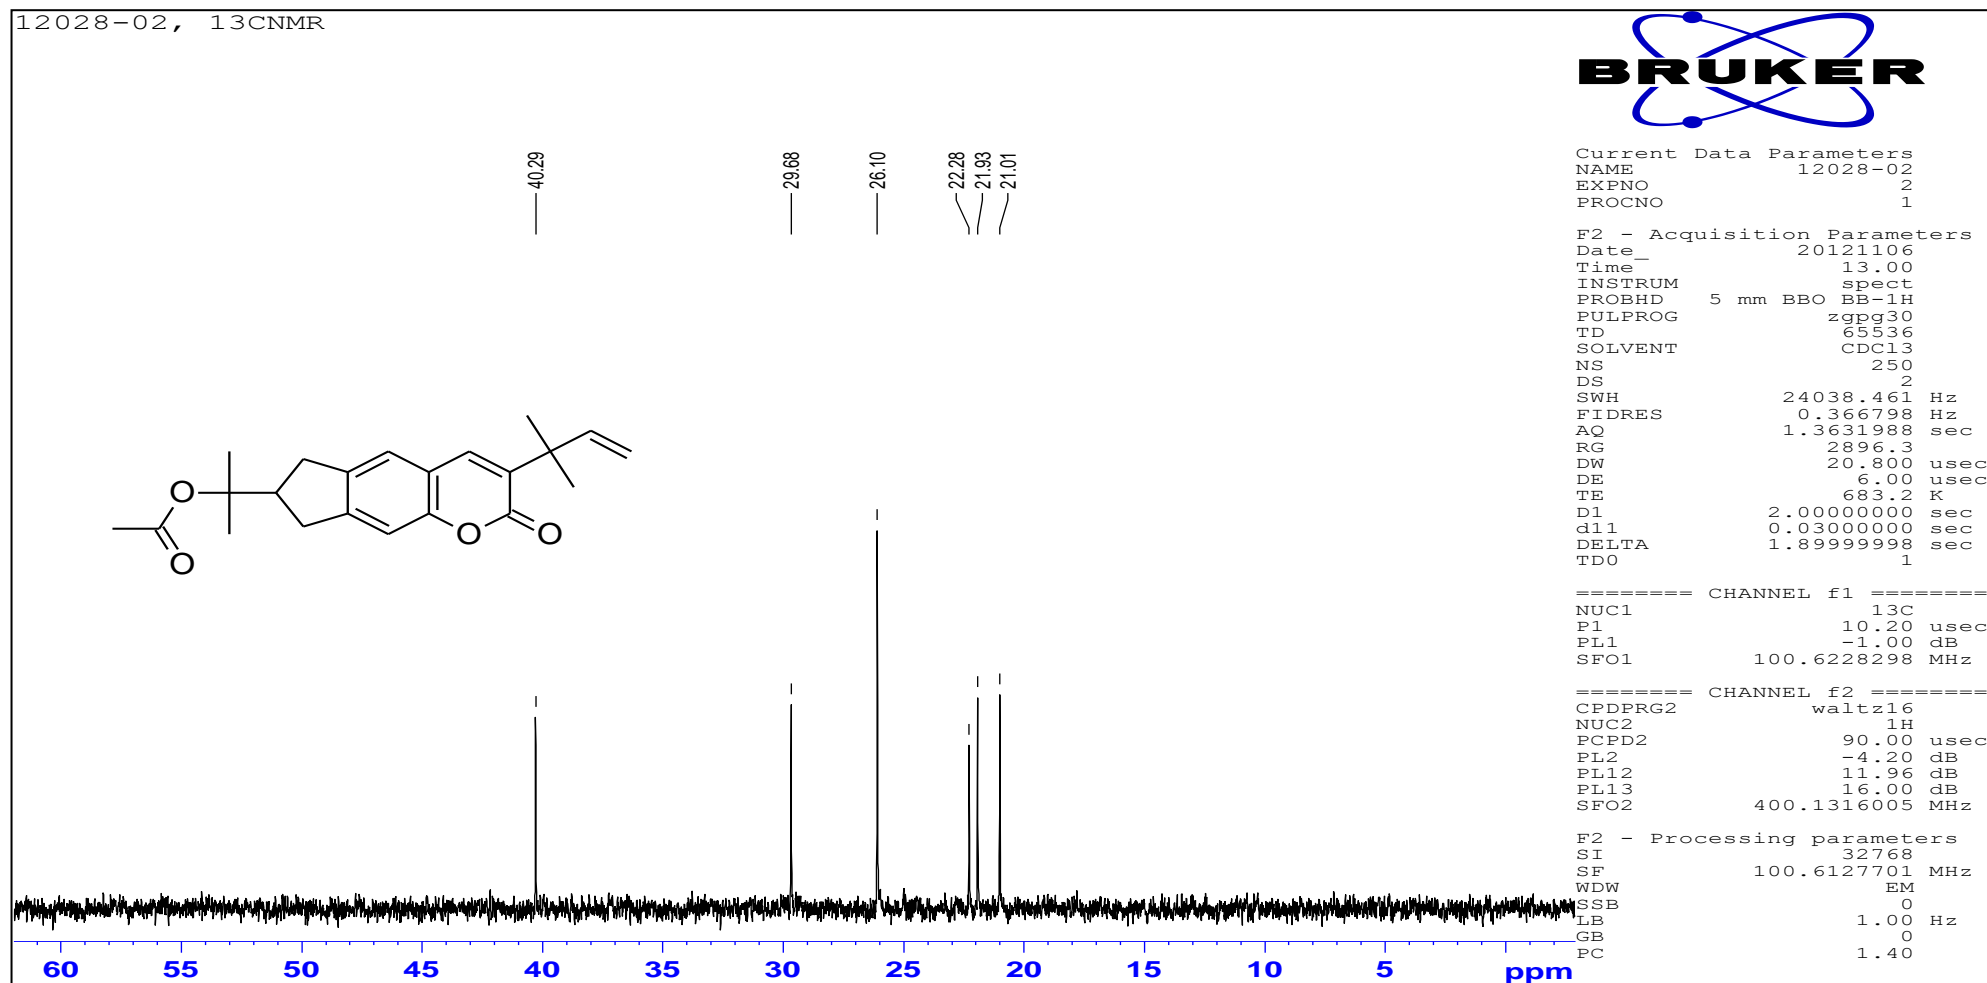

**Figure S6.** Expansion in the area from 0.5-60 ppm <sup>13</sup>C-NMR spectrum of **1**. Obtained by a Bruker Spectrometer Model Advance DPX400, 9.4 Teslas. Operating frequency 100 MHz. (CDCl<sub>3</sub>).

# Spectroscopic analysis of Rutamarin 1

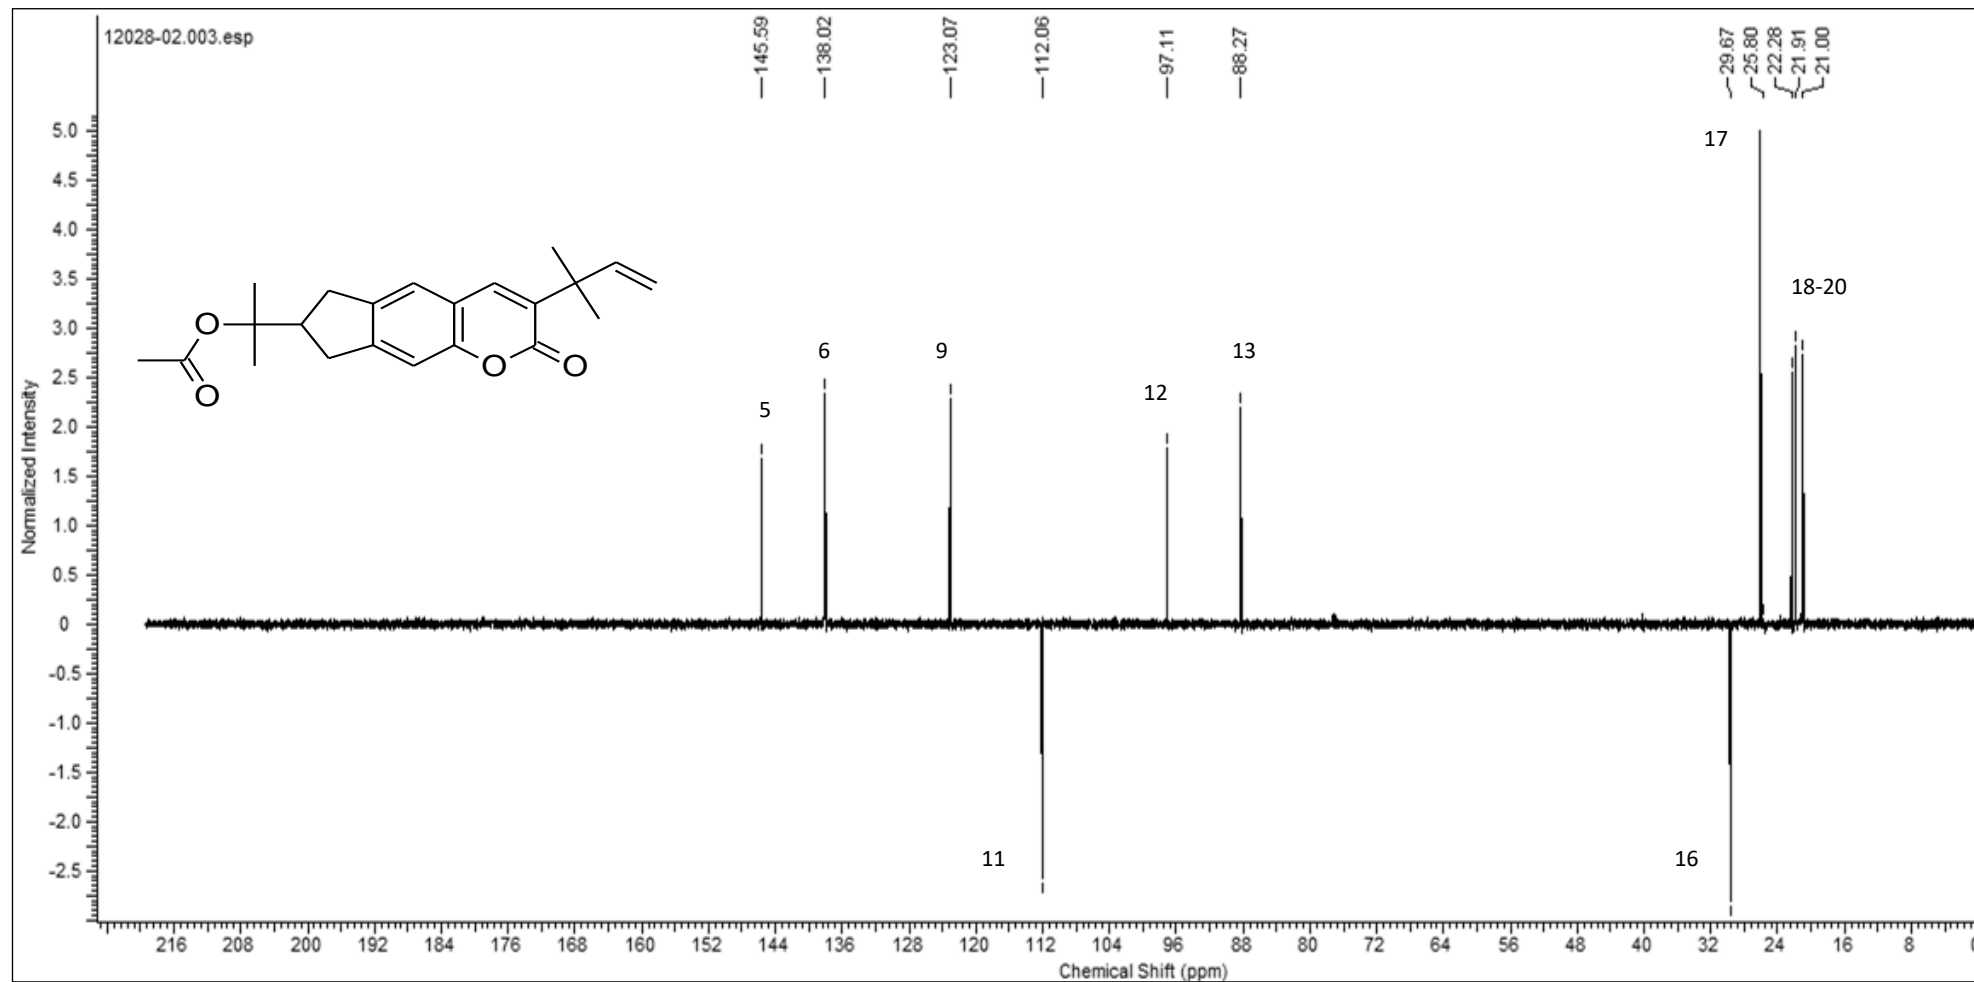

**Figure S7.** DEPT 135 spectrum from  $^{13}\text{C}$ -NMR spectrum of **1**. Obtained by a Bruker Spectrometer Model Advance DPX400, 9.4 Teslas. Operating frequency 100 MHz. ( $\text{CDCl}_3$ ).



# Spectroscopic analysis of Rutamarin 1

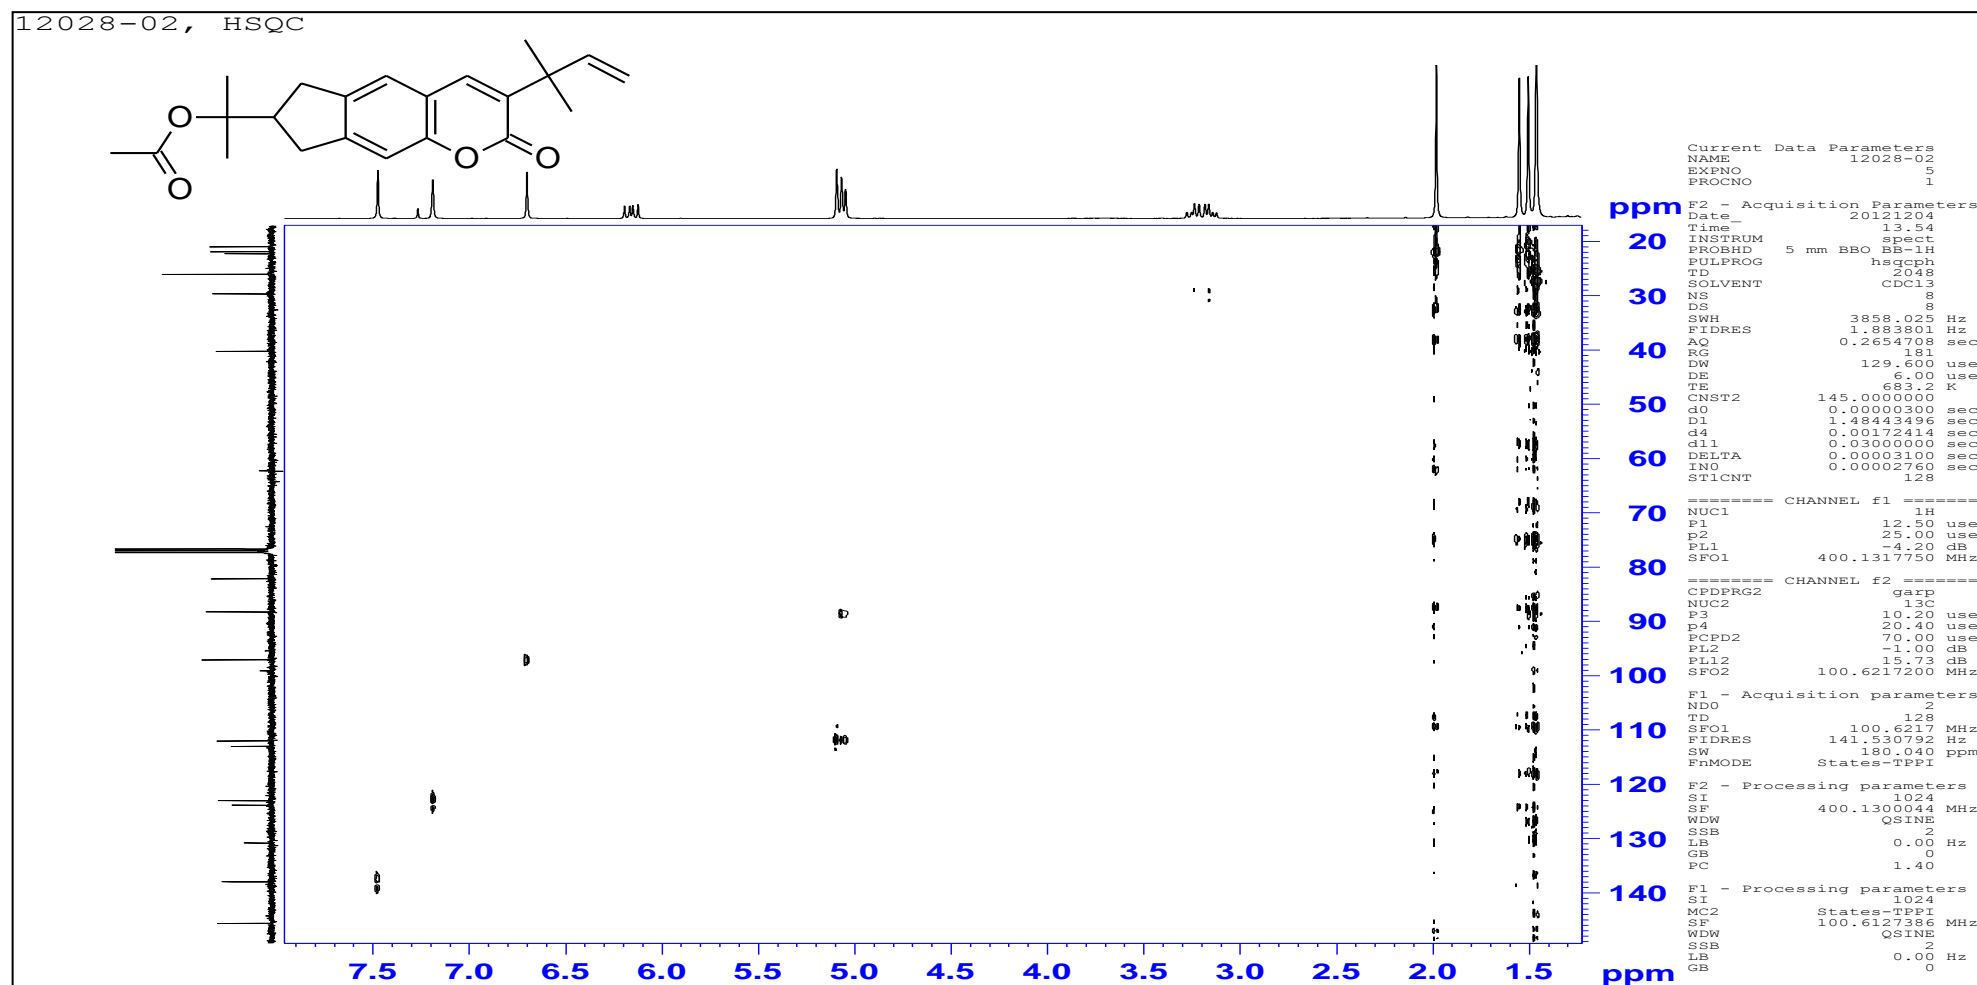

**Figure S8.** HSQC spectrum of 1. Obtained by a Bruker Spectrometer Model Advance DPX400, 9.4 Teslas. Operating frequency 400 MHz.(CDCl<sub>3</sub>).

# Spectroscopic analysis of Rutamarin 1

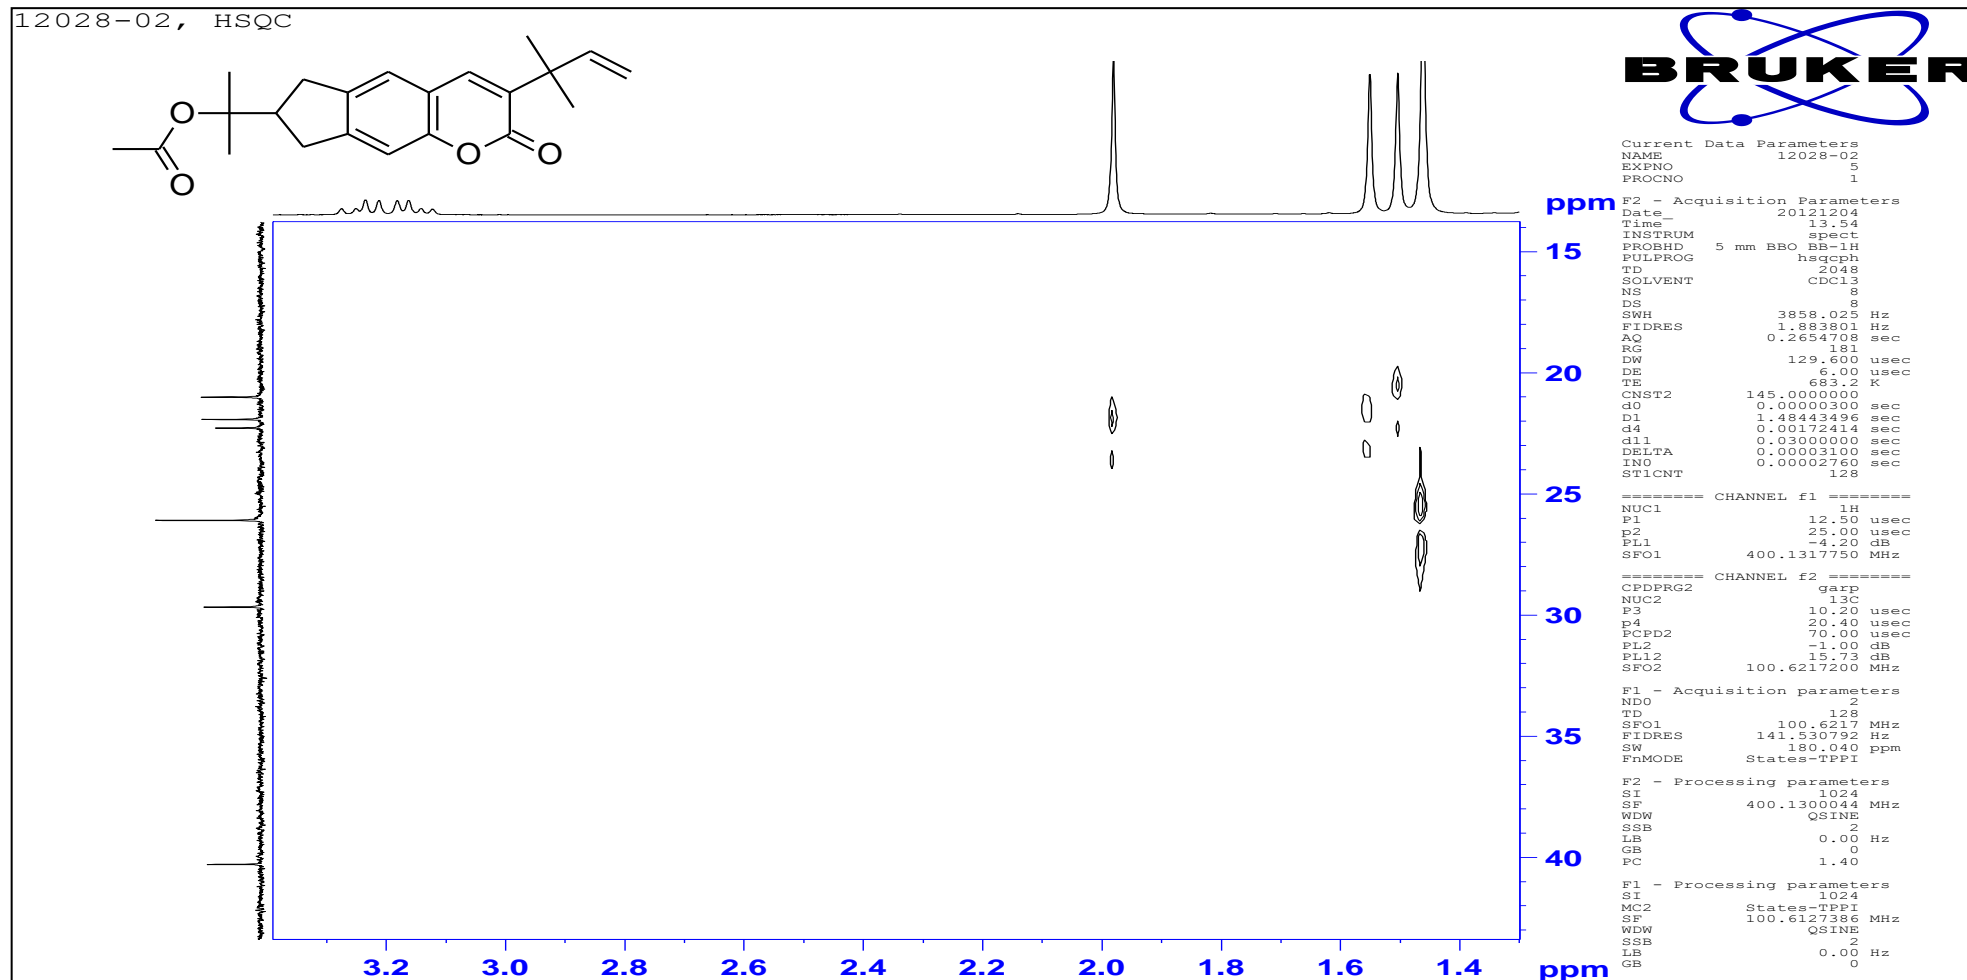

**Figure S9.** Expansion in the area  $^1\text{H}$ : 1.3-3.4 ppm,  $^{13}\text{C}$ : 15-45 ppm. HSQC spectrum of **1**. Obtained by a Bruker Spectrometer Model Advance DPX400, 9.4 Teslas. Operating frequency 400 MHz. ( $\text{CDCl}_3$ ).

# Spectroscopic analysis of Rutamarin 1

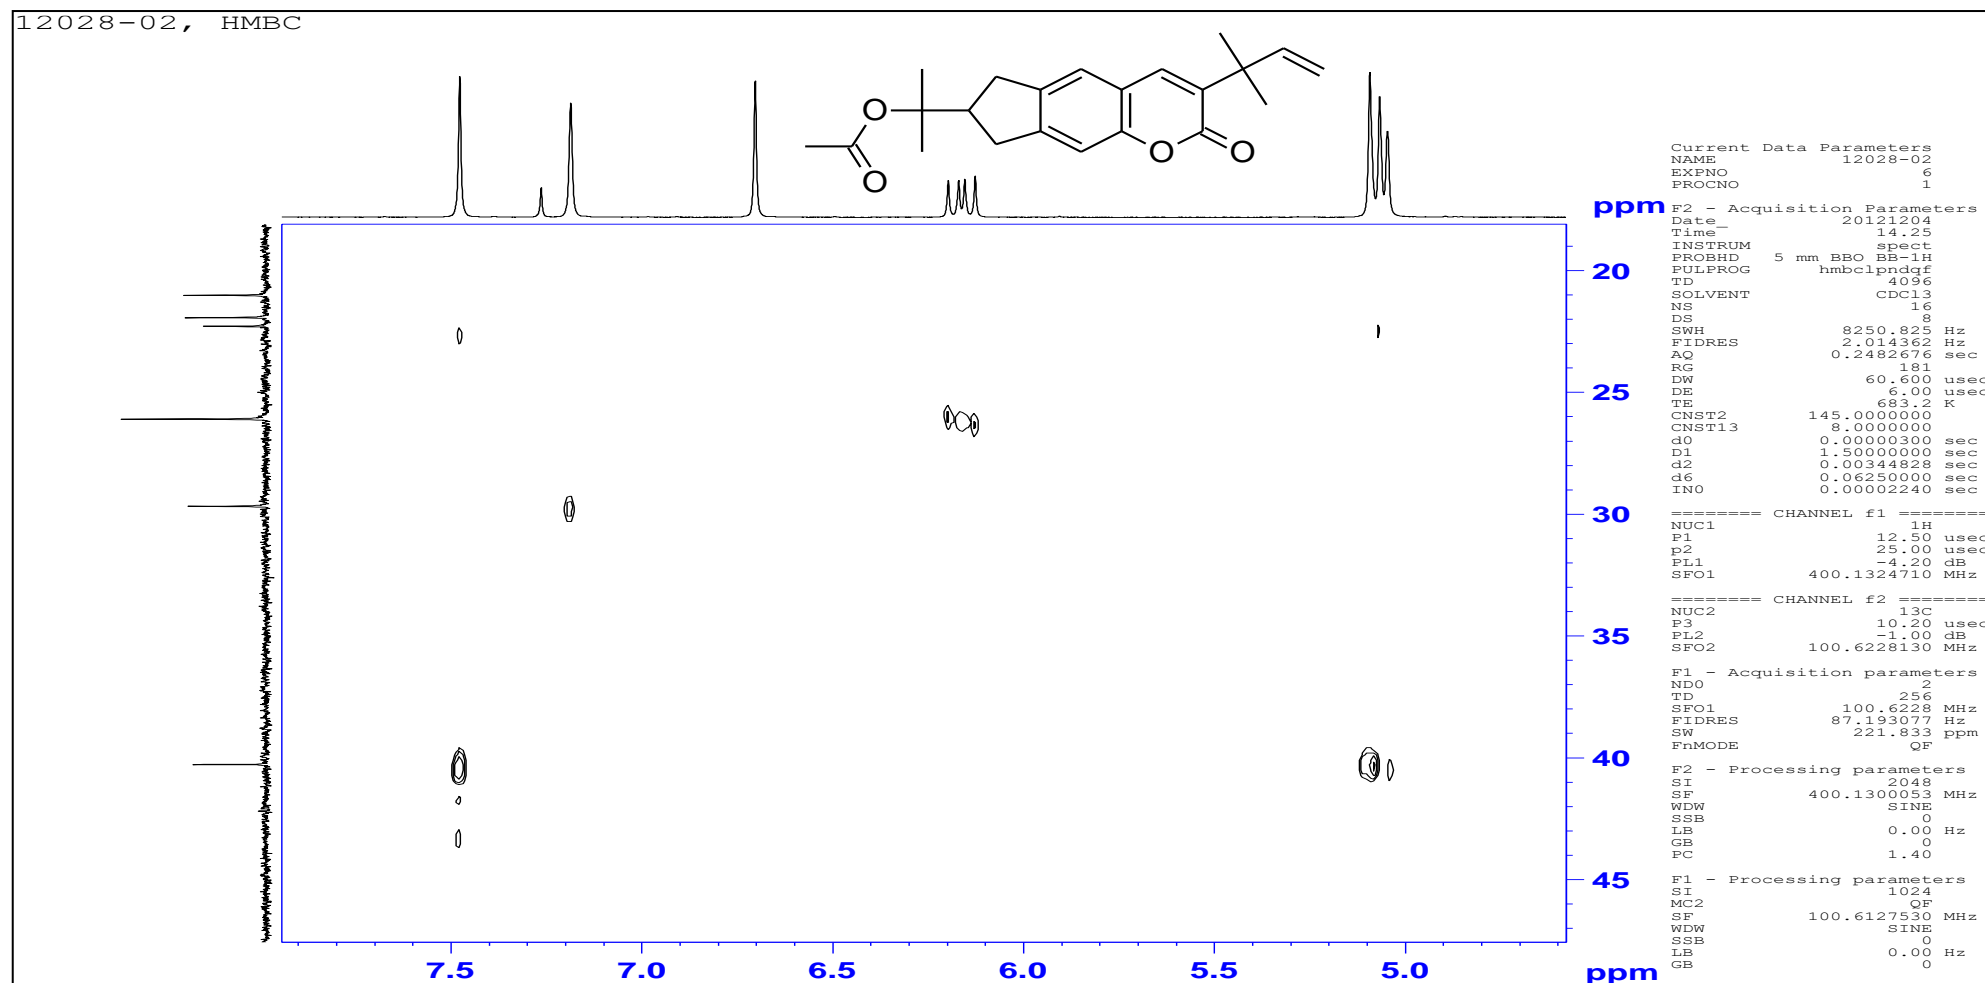

**Figure S10.** Expansion in the area  $^1\text{H}$ : 4.6-8.0 ppm,  $^{13}\text{C}$ : 20-50 ppm. HSQC spectrum of **1**. Obtained by a Bruker Spectrometer Model Advance DPX400, 9.4 Teslas. Operating frequency 400 MHz. ( $\text{CDCl}_3$ ).

# Spectroscopic analysis of Rutamarin 1

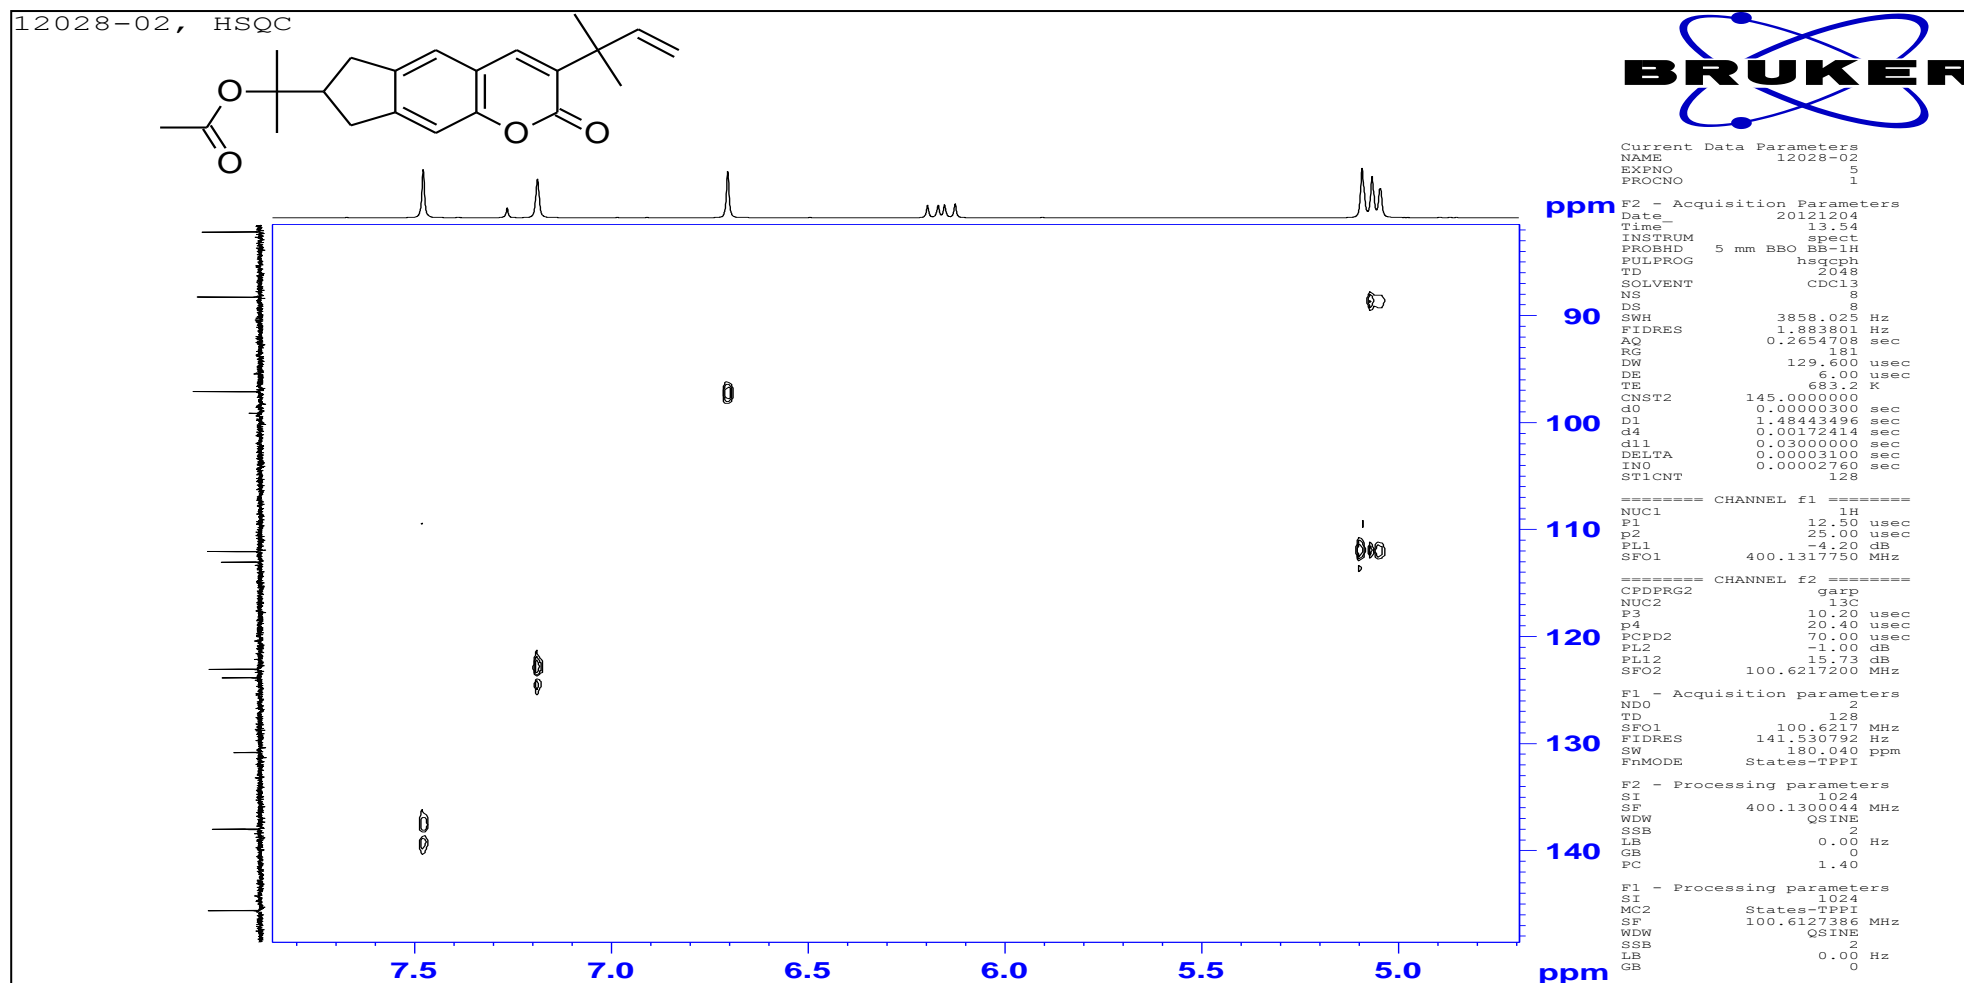

**Figure S11.** Expansion in the area  $^1\text{H}$ : 4.6-8.0 ppm,  $^{13}\text{C}$ : 80-150 ppm. HSQC spectrum of **1**. Obtained by a Bruker Spectrometer Model Advance DPX400, 9.4 Teslas. Operating frequency 400 MHz. ( $\text{CDCl}_3$ ).

# Spectroscopic analysis of Rutamarin 1

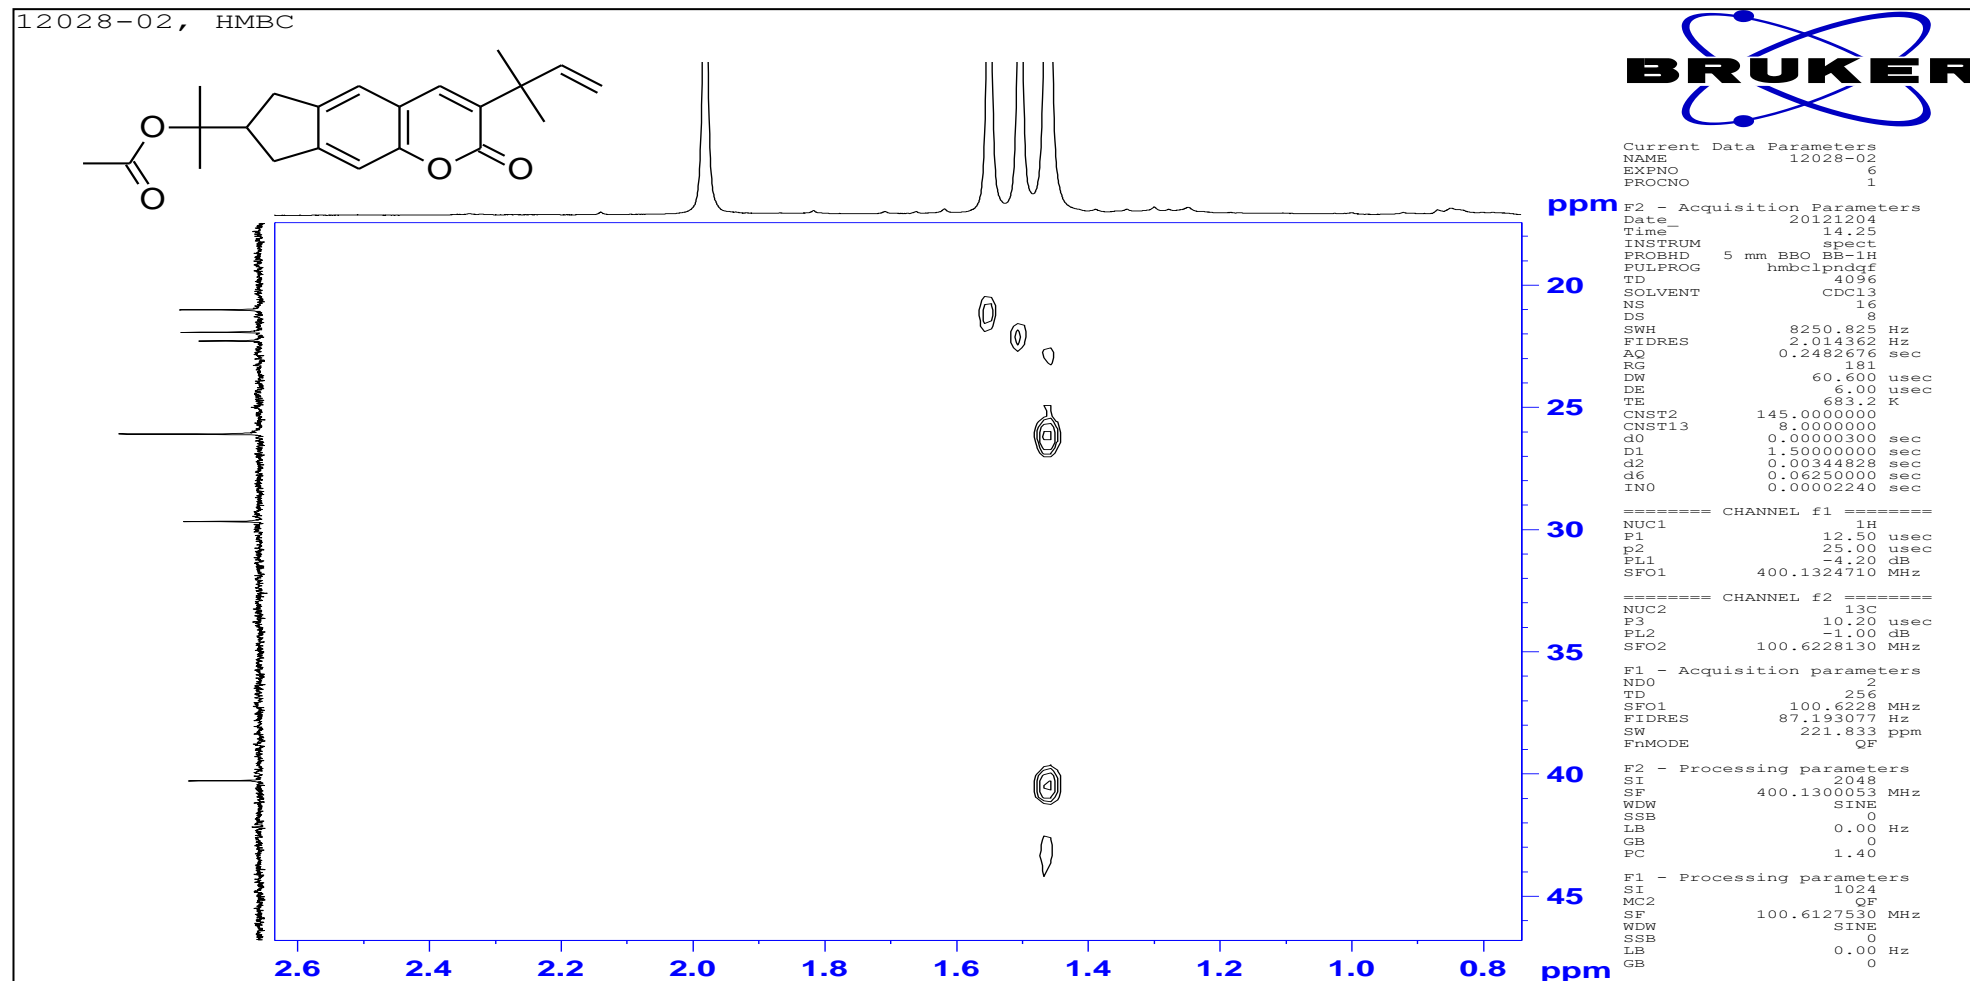

**Figure S12.** Expansion in the area  $^1\text{H}$ : 0.8-2.6 ppm,  $^{13}\text{C}$ : 15-50 ppm. HMBC spectrum of **1**. Obtained by a Bruker Spectrometer Model Advance DPX400, 9.4 Teslas. Operating frequency 400 MHz. ( $\text{CDCl}_3$ ).

# Spectroscopic analysis of Rutamarin 1

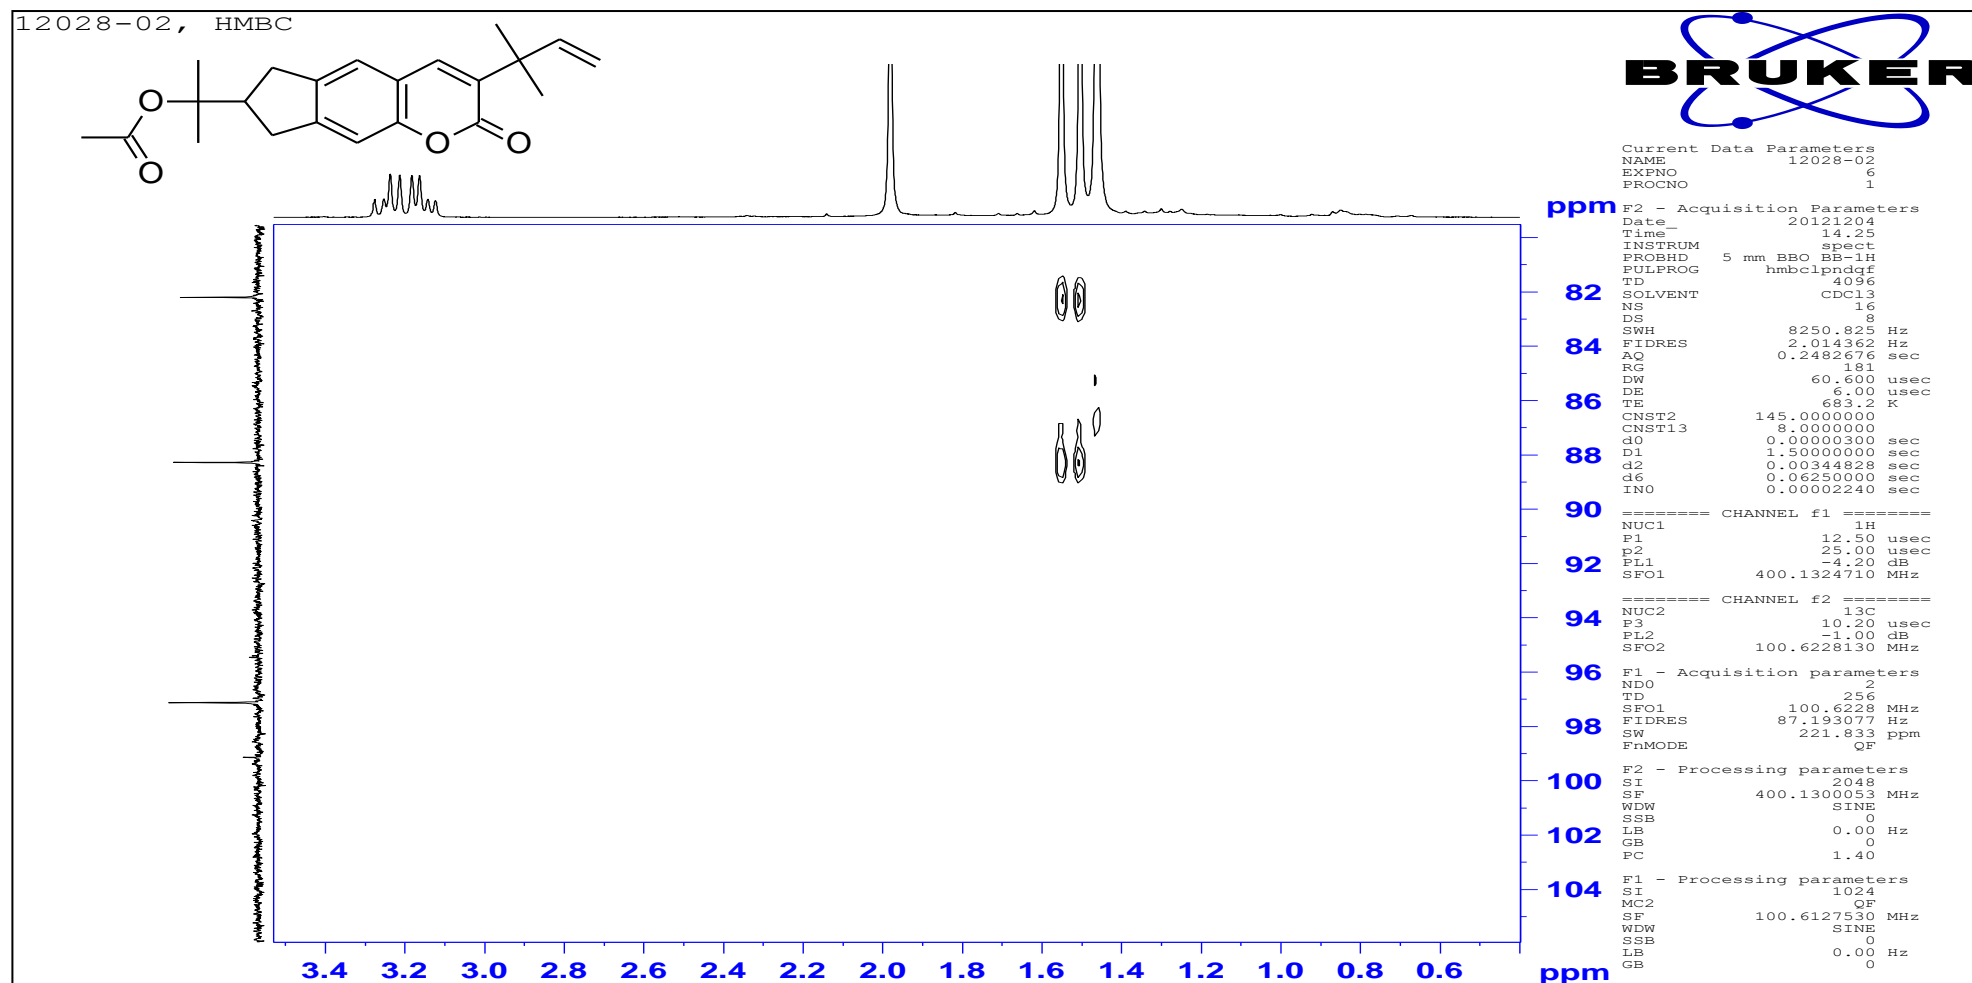

**Figure S13.** Expansion in the area  $^1\text{H}$ : 0.4-3.5 ppm,  $^{13}\text{C}$ : 80-106 ppm. HMBC spectrum of **1**. Obtained by a Bruker Spectrometer Model Advance DPX400, 9.4 Teslas. Operating frequency 400 MHz. ( $\text{CDCl}_3$ ).

# Spectroscopic analysis of Rutamarin 1

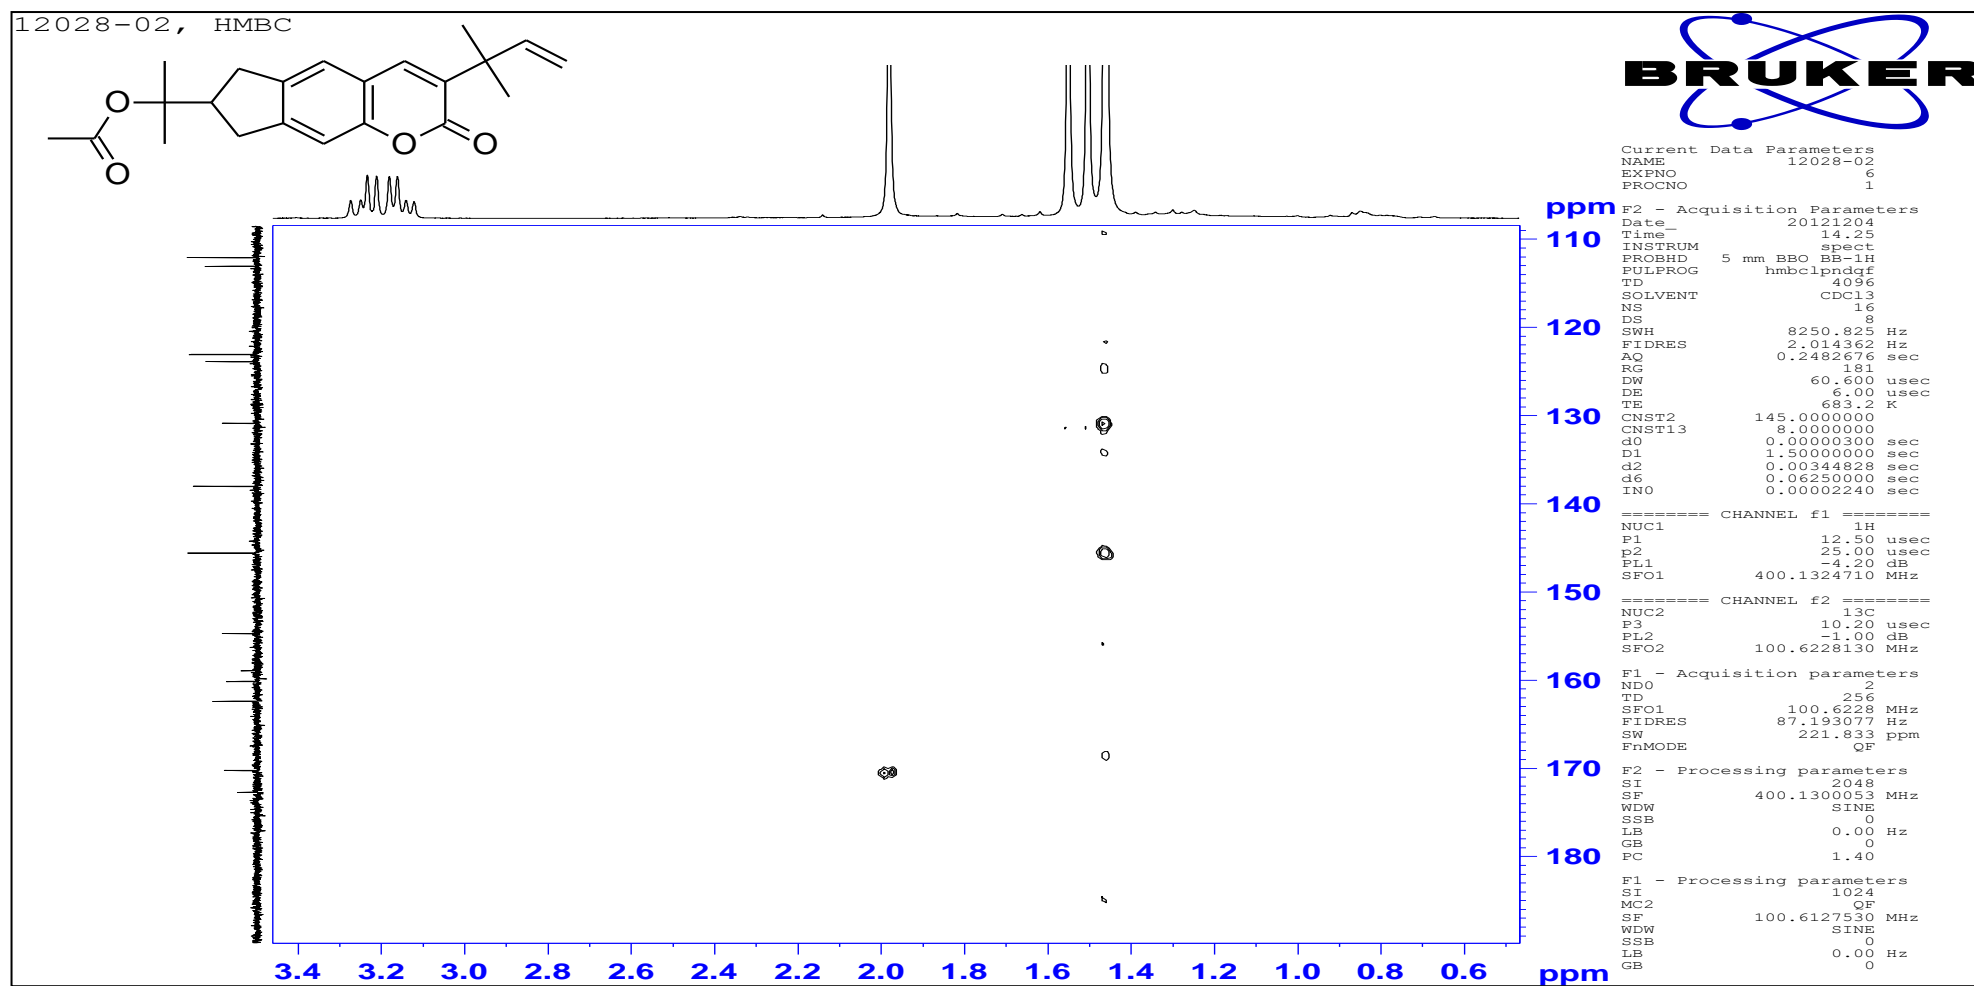

**Figure S14.** Expansion in the area  $^1\text{H}$ : 0.4-3.4 ppm,  $^{13}\text{C}$ : 110-190 ppm. HMBC spectrum of 1. Obtained by a Bruker Spectrometer Model Advance DPX400, 9.4 Teslas. Operating frequency 400 MHz. ( $\text{CDCl}_3$ ).

# Spectroscopic analysis of Rutamarin 1

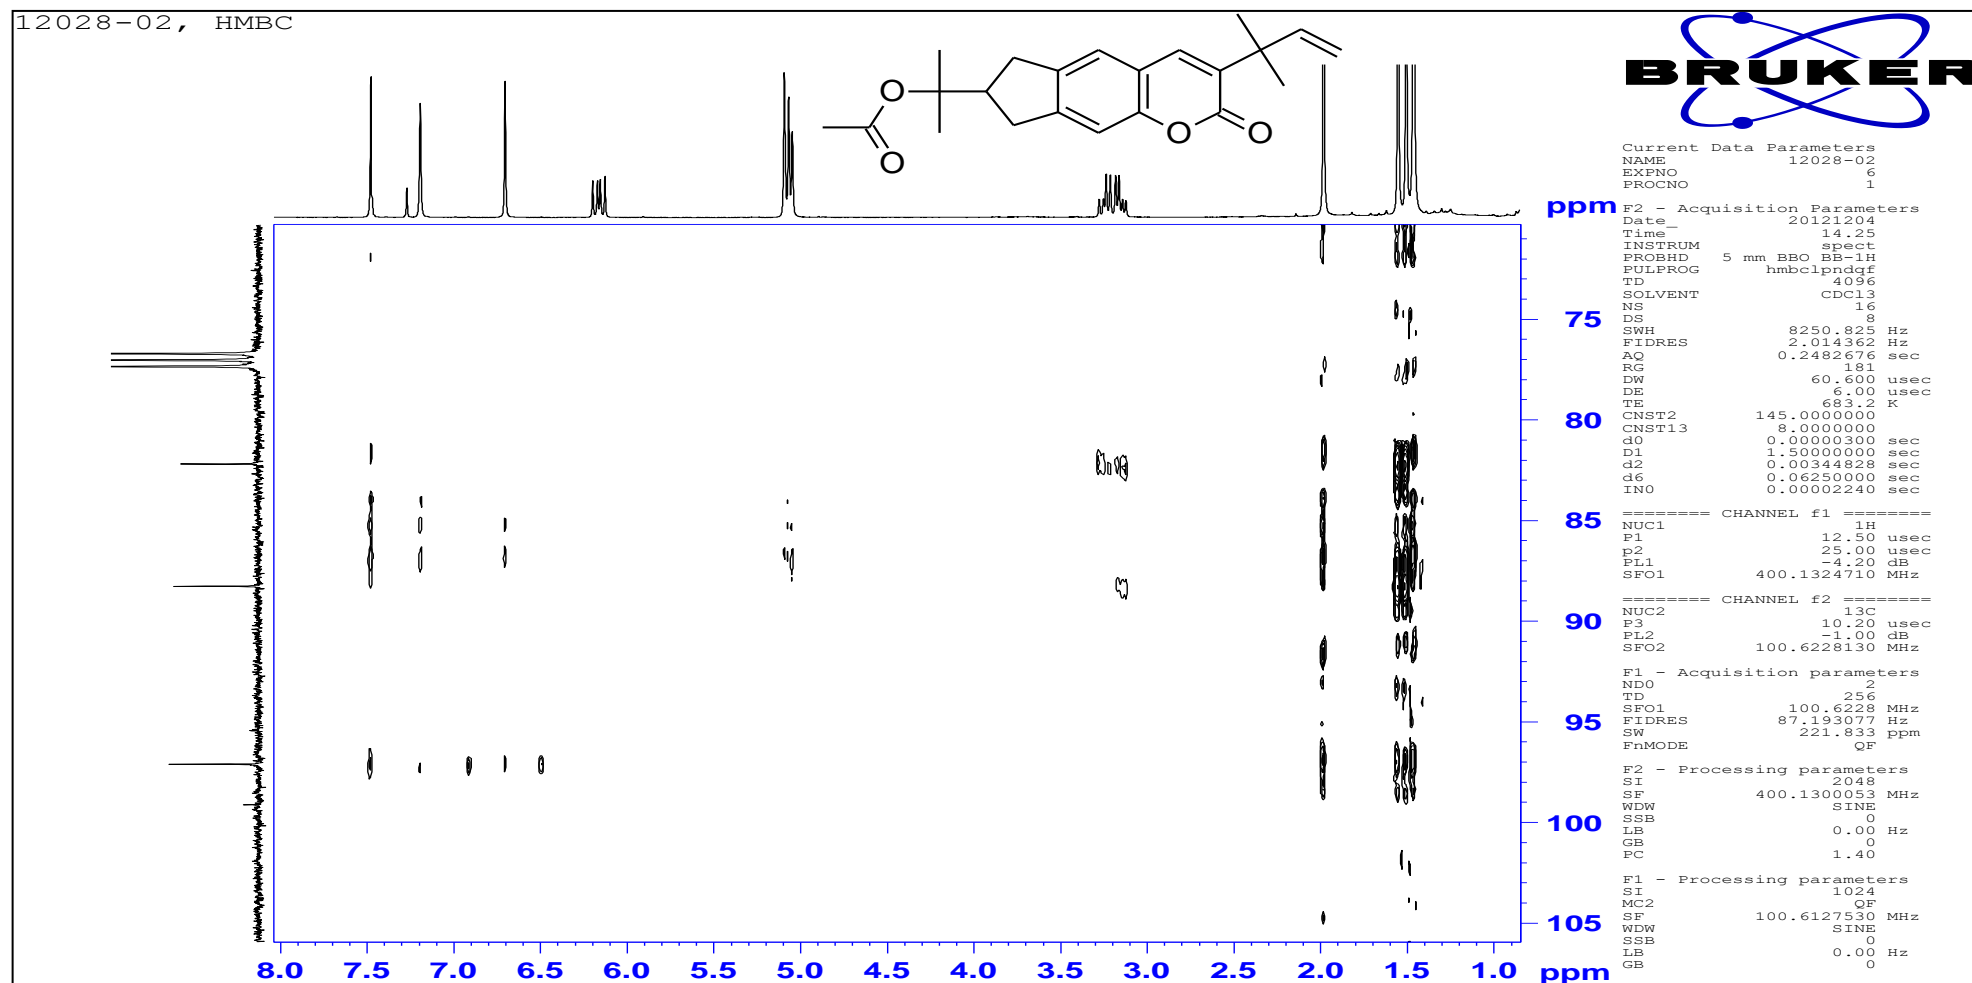

**Figure S15.** Expansion in the area  $^1\text{H}$ : 1.8-8.0 ppm,  $^{13}\text{C}$ : 70-105 ppm. HMBC spectrum of 1. Obtained by a Bruker Spectrometer Model Advance DPX400, 9.4 Teslas. Operating frequency 400 MHz. ( $\text{CDCl}_3$ ).



# Spectroscopic analysis of Rutamarin 1

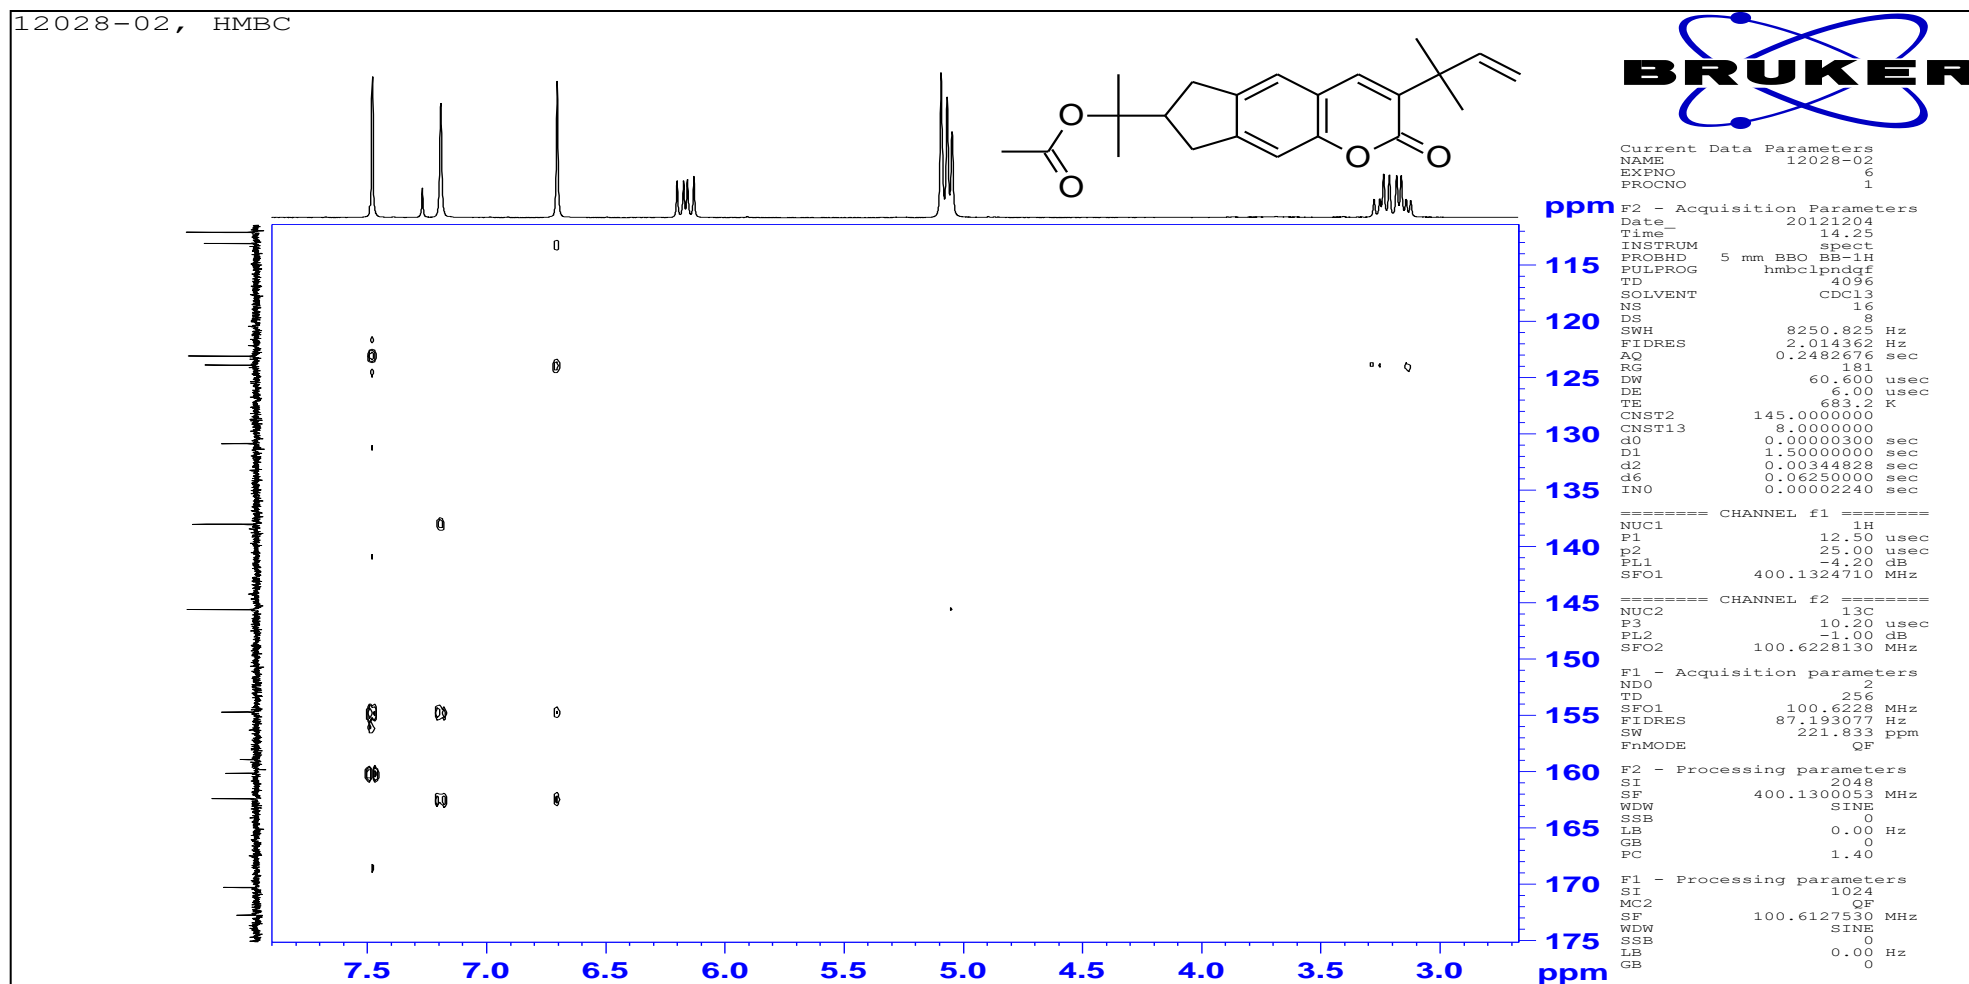

**Figure S16.** Expansion in the area  $^1\text{H}$ : 2.5-8.0 ppm,  $^{13}\text{C}$ : 110-175 ppm. HMBC spectrum of 1. Obtained by a Bruker Spectrometer Model Advance DPX400, 9.4 Teslas. Operating frequency 400 MHz. ( $\text{CDCl}_3$ ).

# Spectroscopic analysis of Chalepin 2

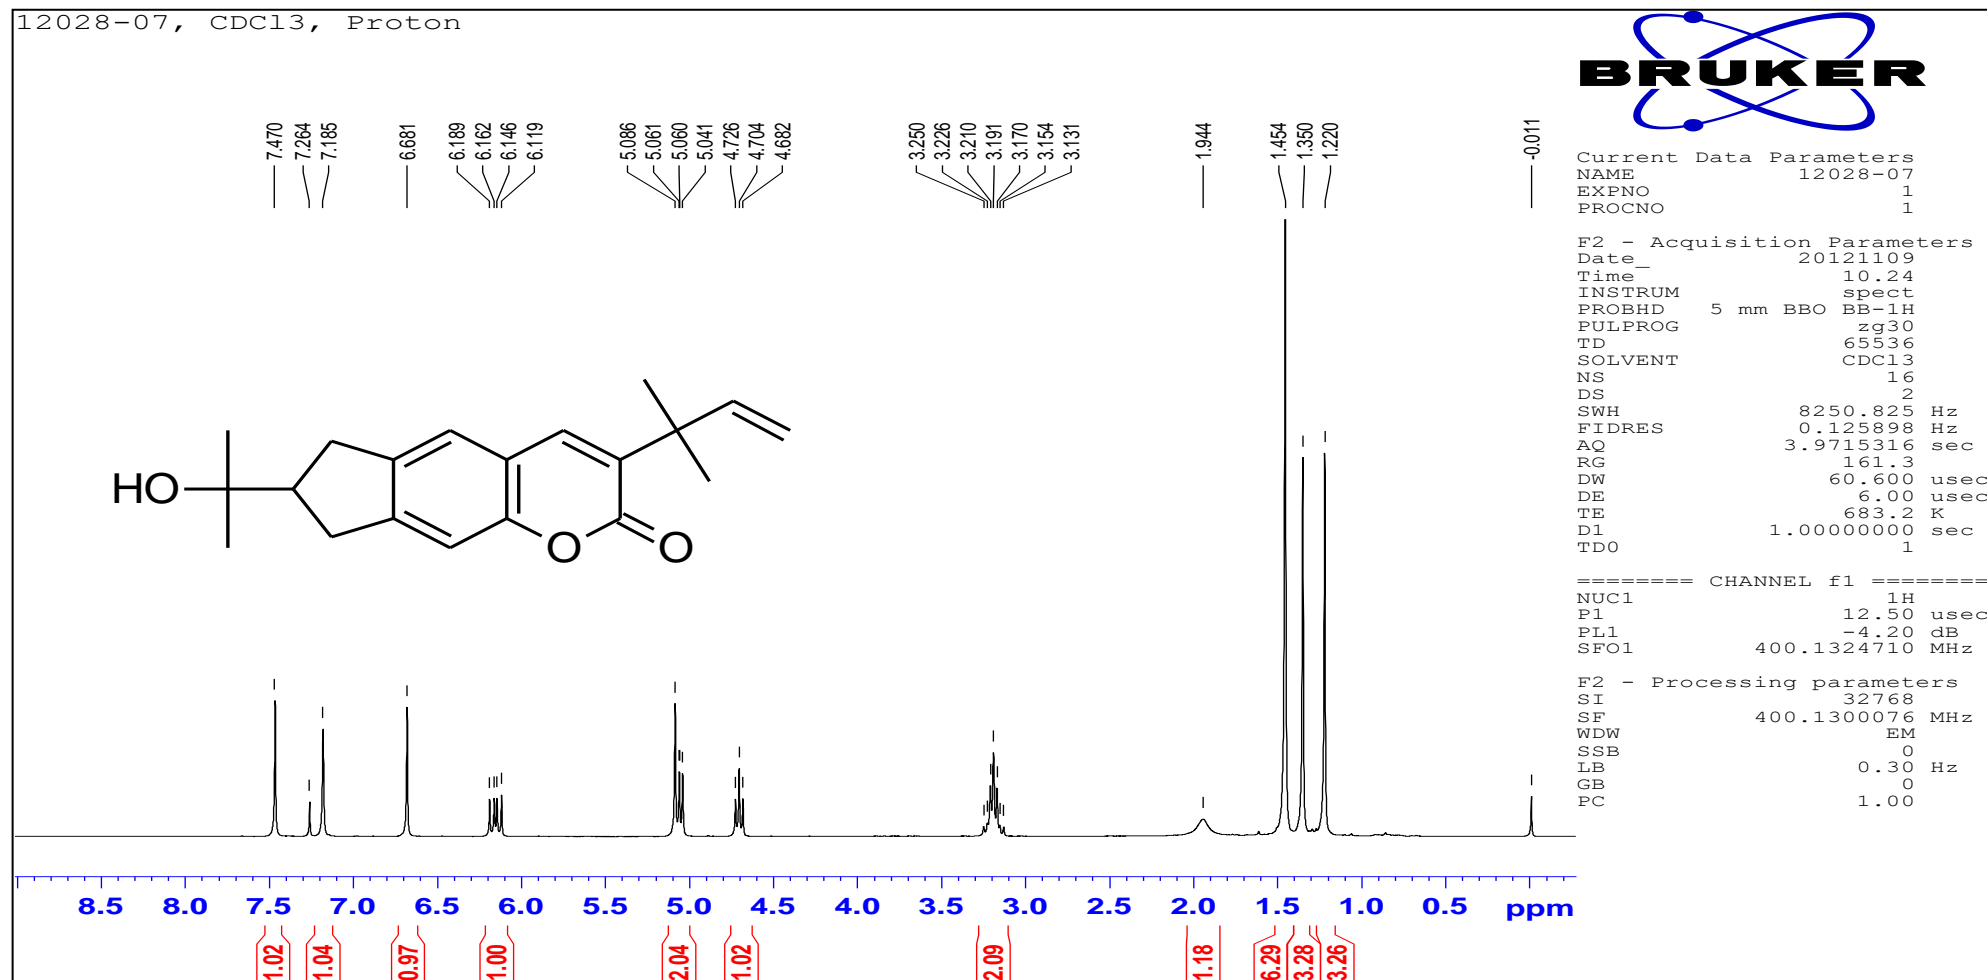

**Figure S17.** <sup>1</sup>H-NMR spectrum of **2**. Obtained by a Bruker Spectrometer Model Advance DPX400, 9.4 Teslas. Operating frequency 400 MHz. (CDCl<sub>3</sub>).

# Spectroscopic analysis of Chalepin 2

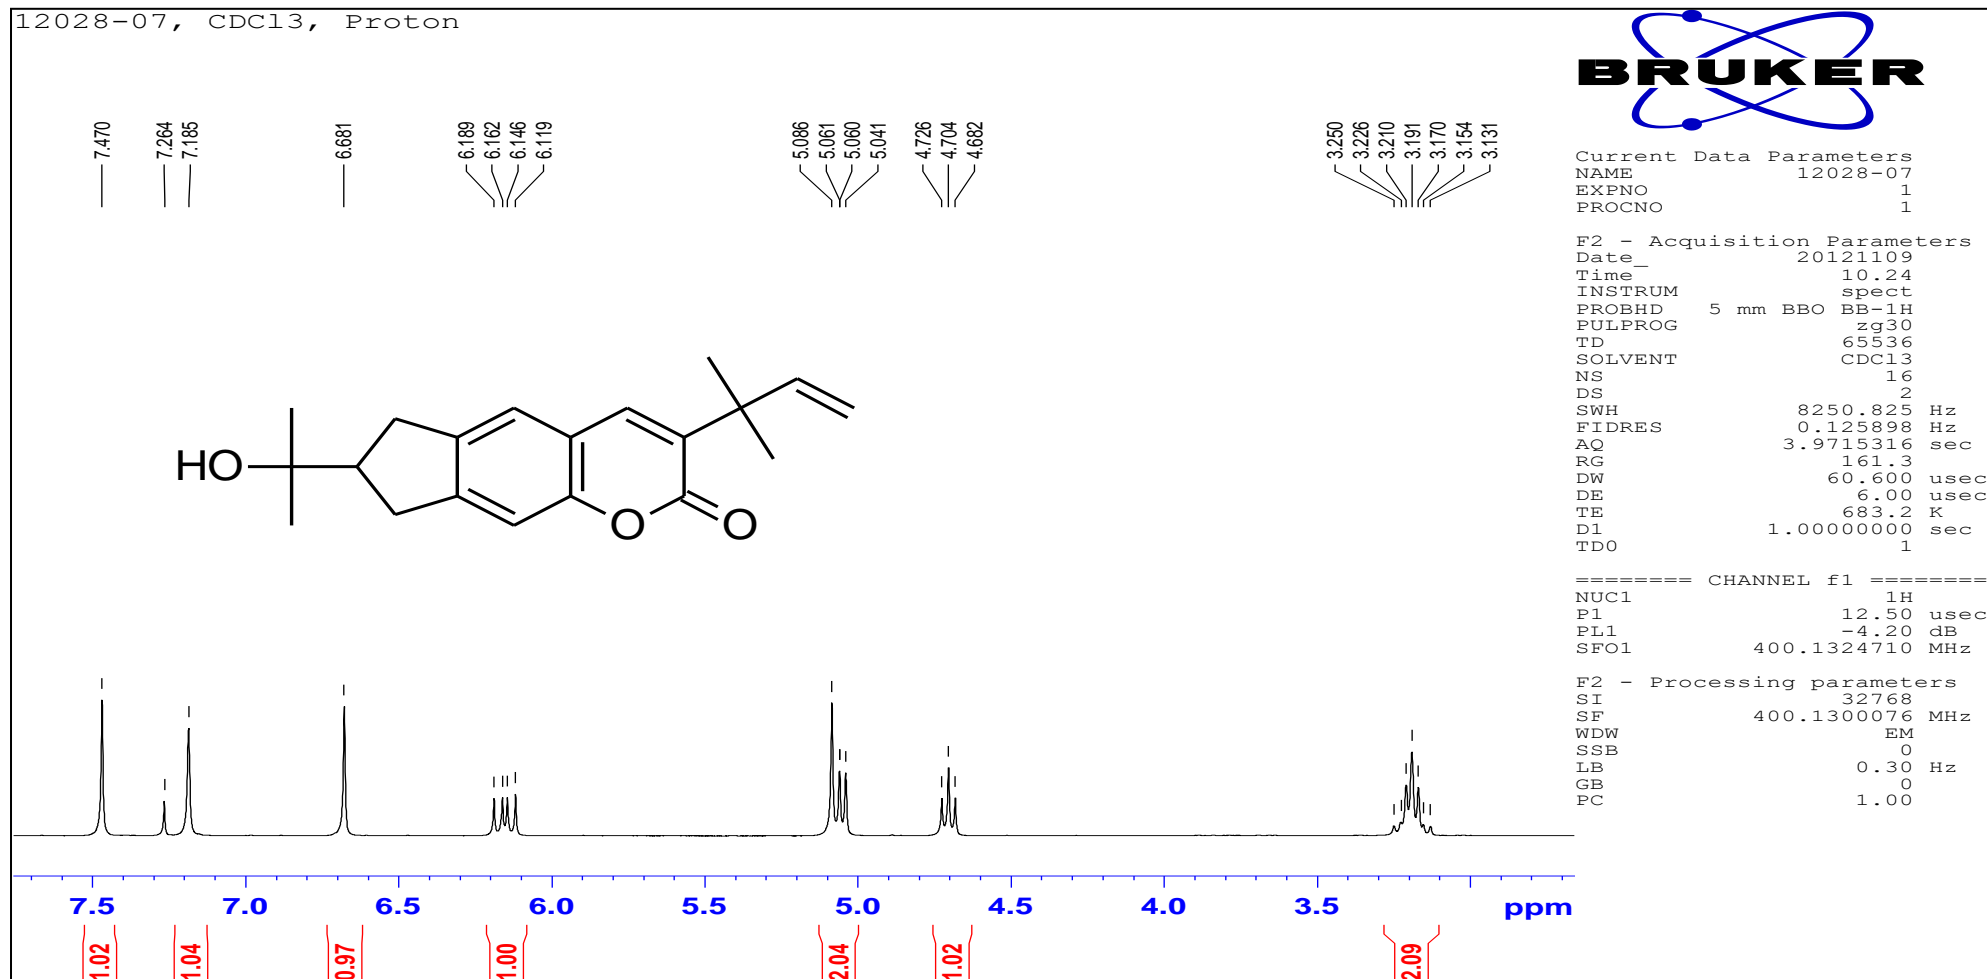

**Figure S18.** Expansion in the area from 2.5-8.0 ppm. <sup>1</sup>H-NMR spectrum of **2**. Obtained by a Bruker Spectrometer Model Advance DPX400, 9.4 Teslas. Operating frequency 400 MHz. (CDCl<sub>3</sub>).

## Spectroscopic analysis of Chalepin 2

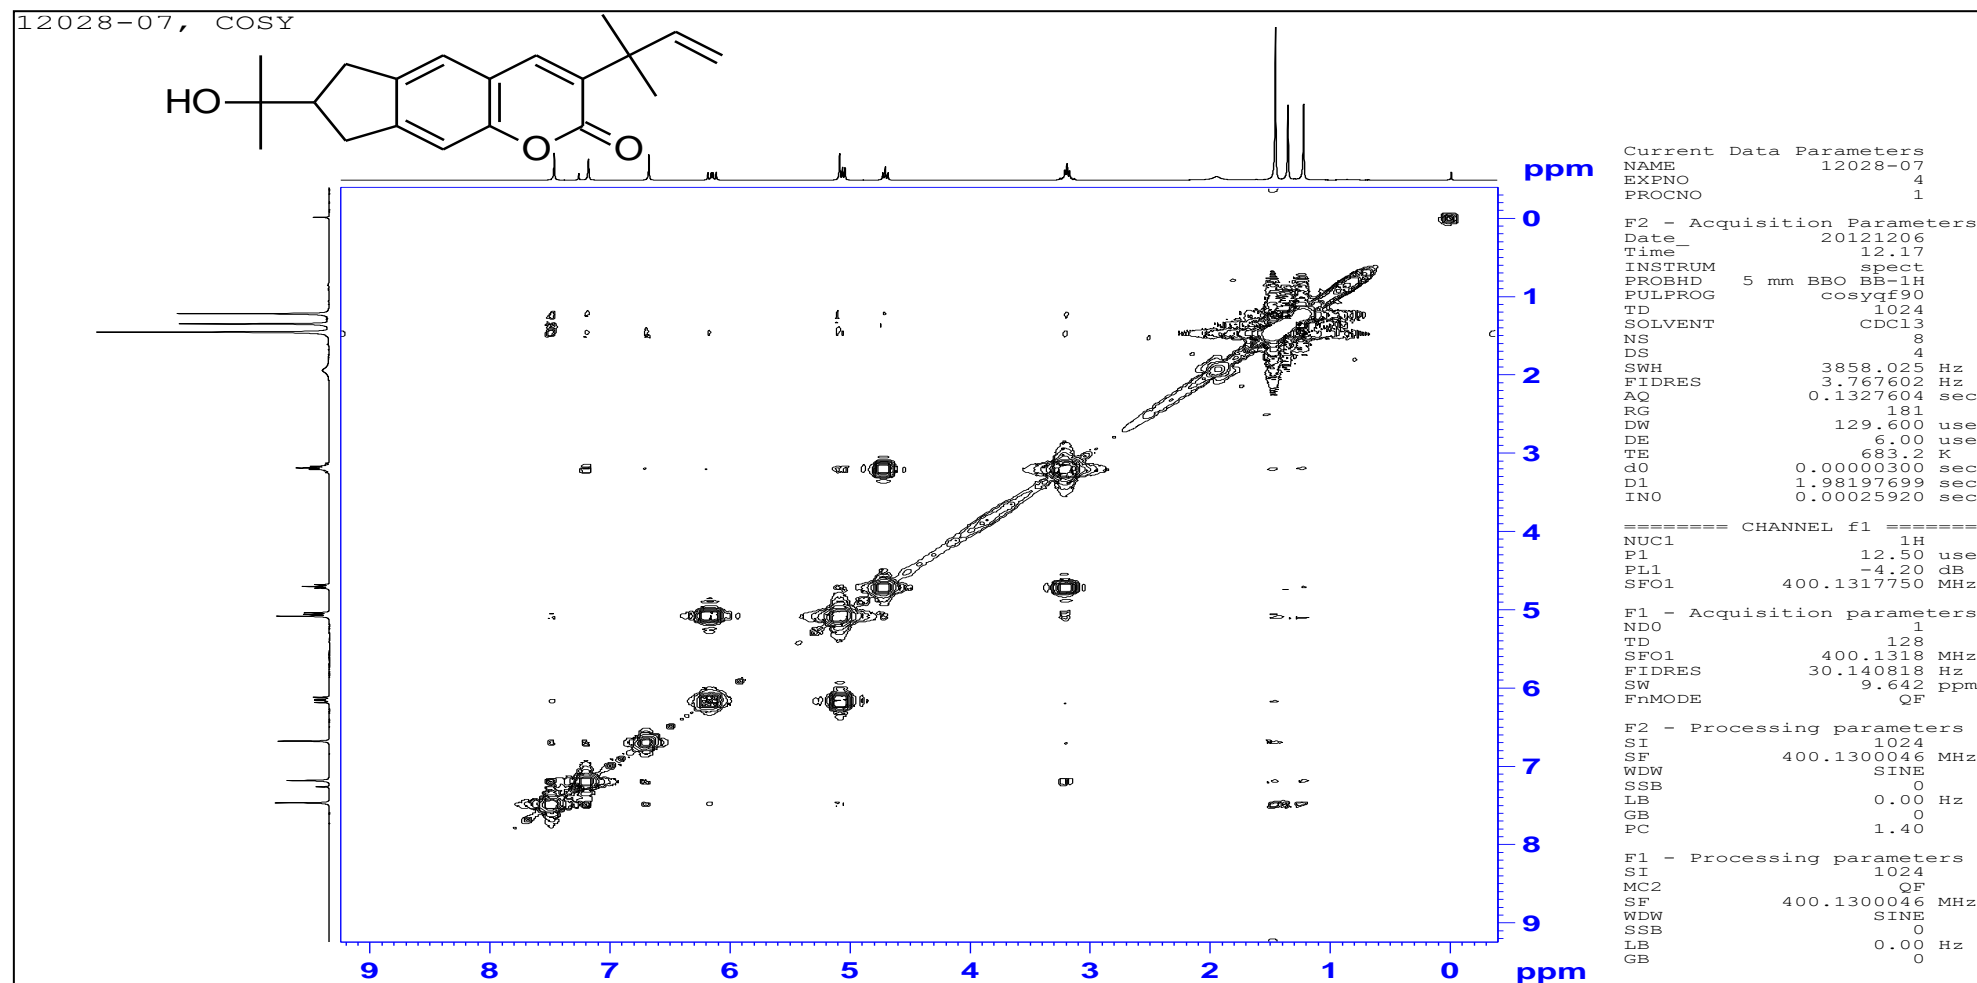

**Figure S19.** COSY spectrum of **2**. Obtained by a Bruker Spectrometer Model Advance DPX400, 9.4 Teslas. Operating frequency 400 MHz. (CDCl<sub>3</sub>).

## Spectroscopic analysis of Chalepin 2

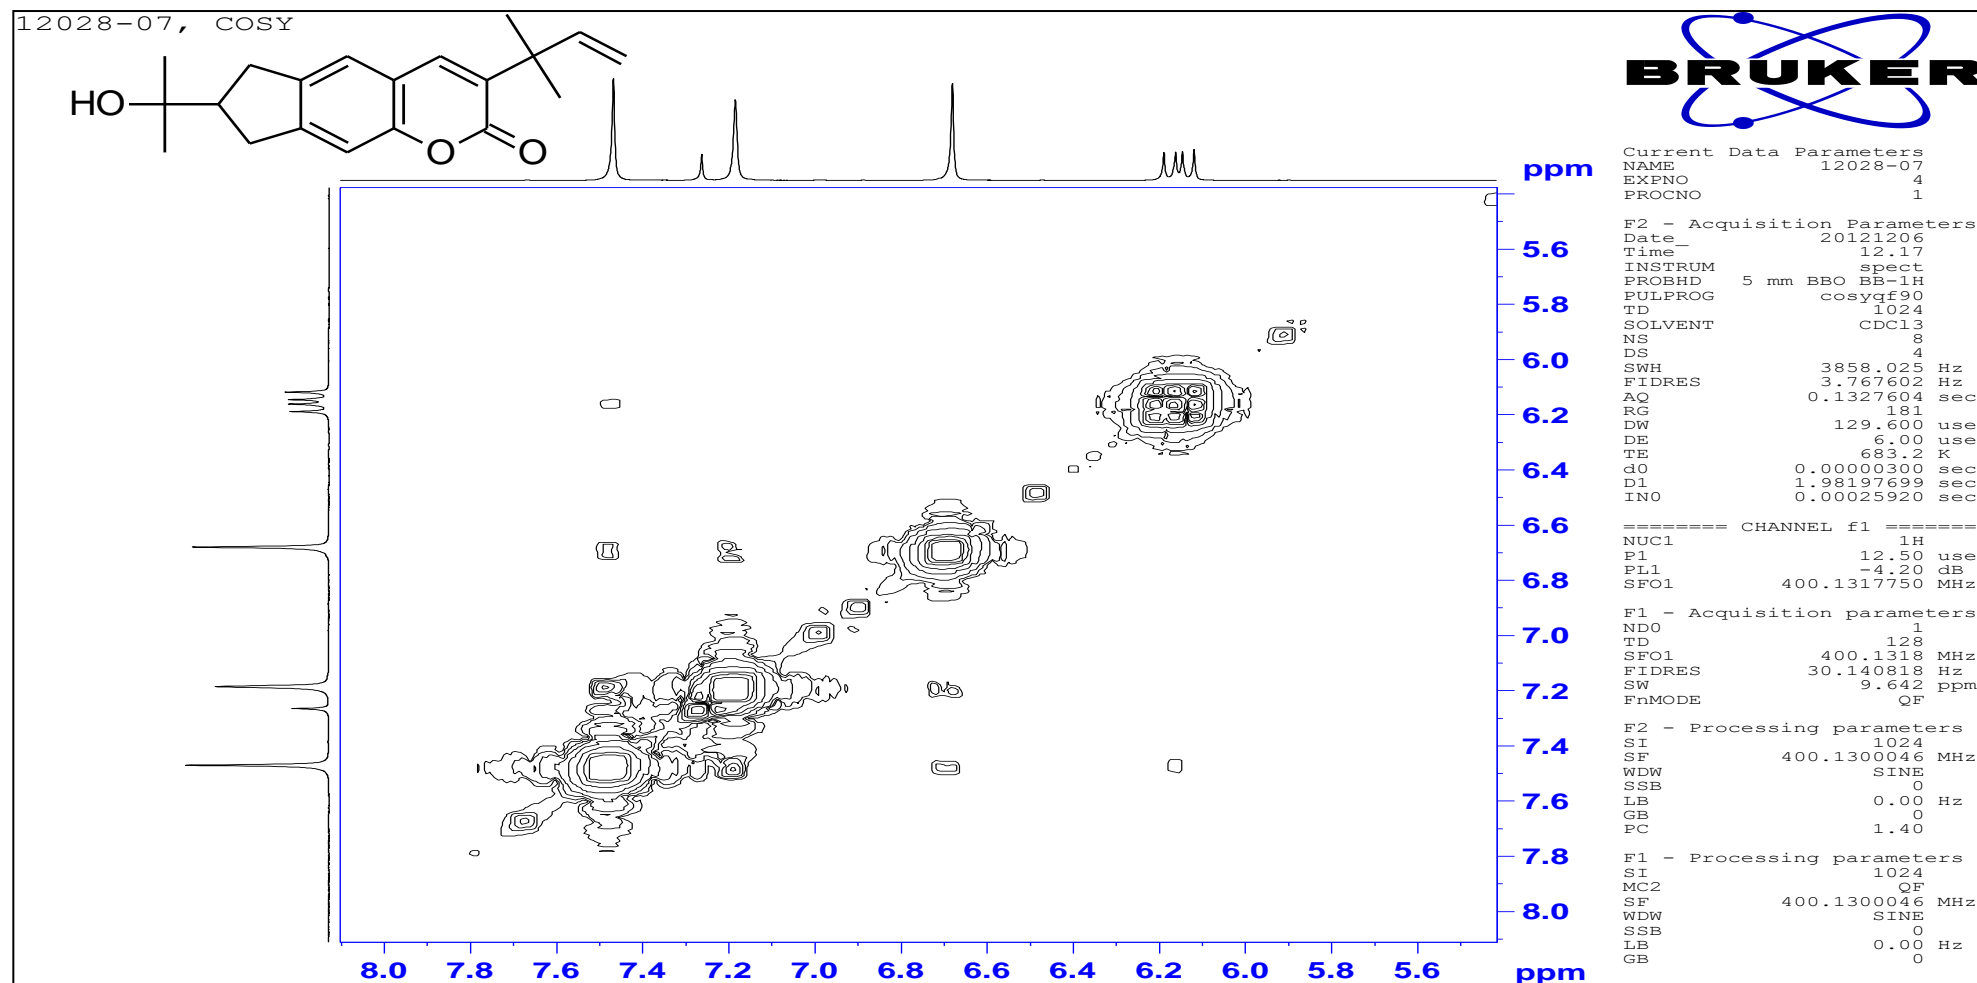

**Figure S20.** Expansion in the area  $^1\text{H}$ : 5.6-8.0ppm,  $^1\text{H}$ : 5.6-8.0 ppm. COSY spectrum of **2**. Obtained by a Bruker Spectrometer Model Advance DPX400, 9.4 Teslas. Operating frequency 400 MHz. ( $\text{CDCl}_3$ ).

# Spectroscopic analysis of Chalepin 2

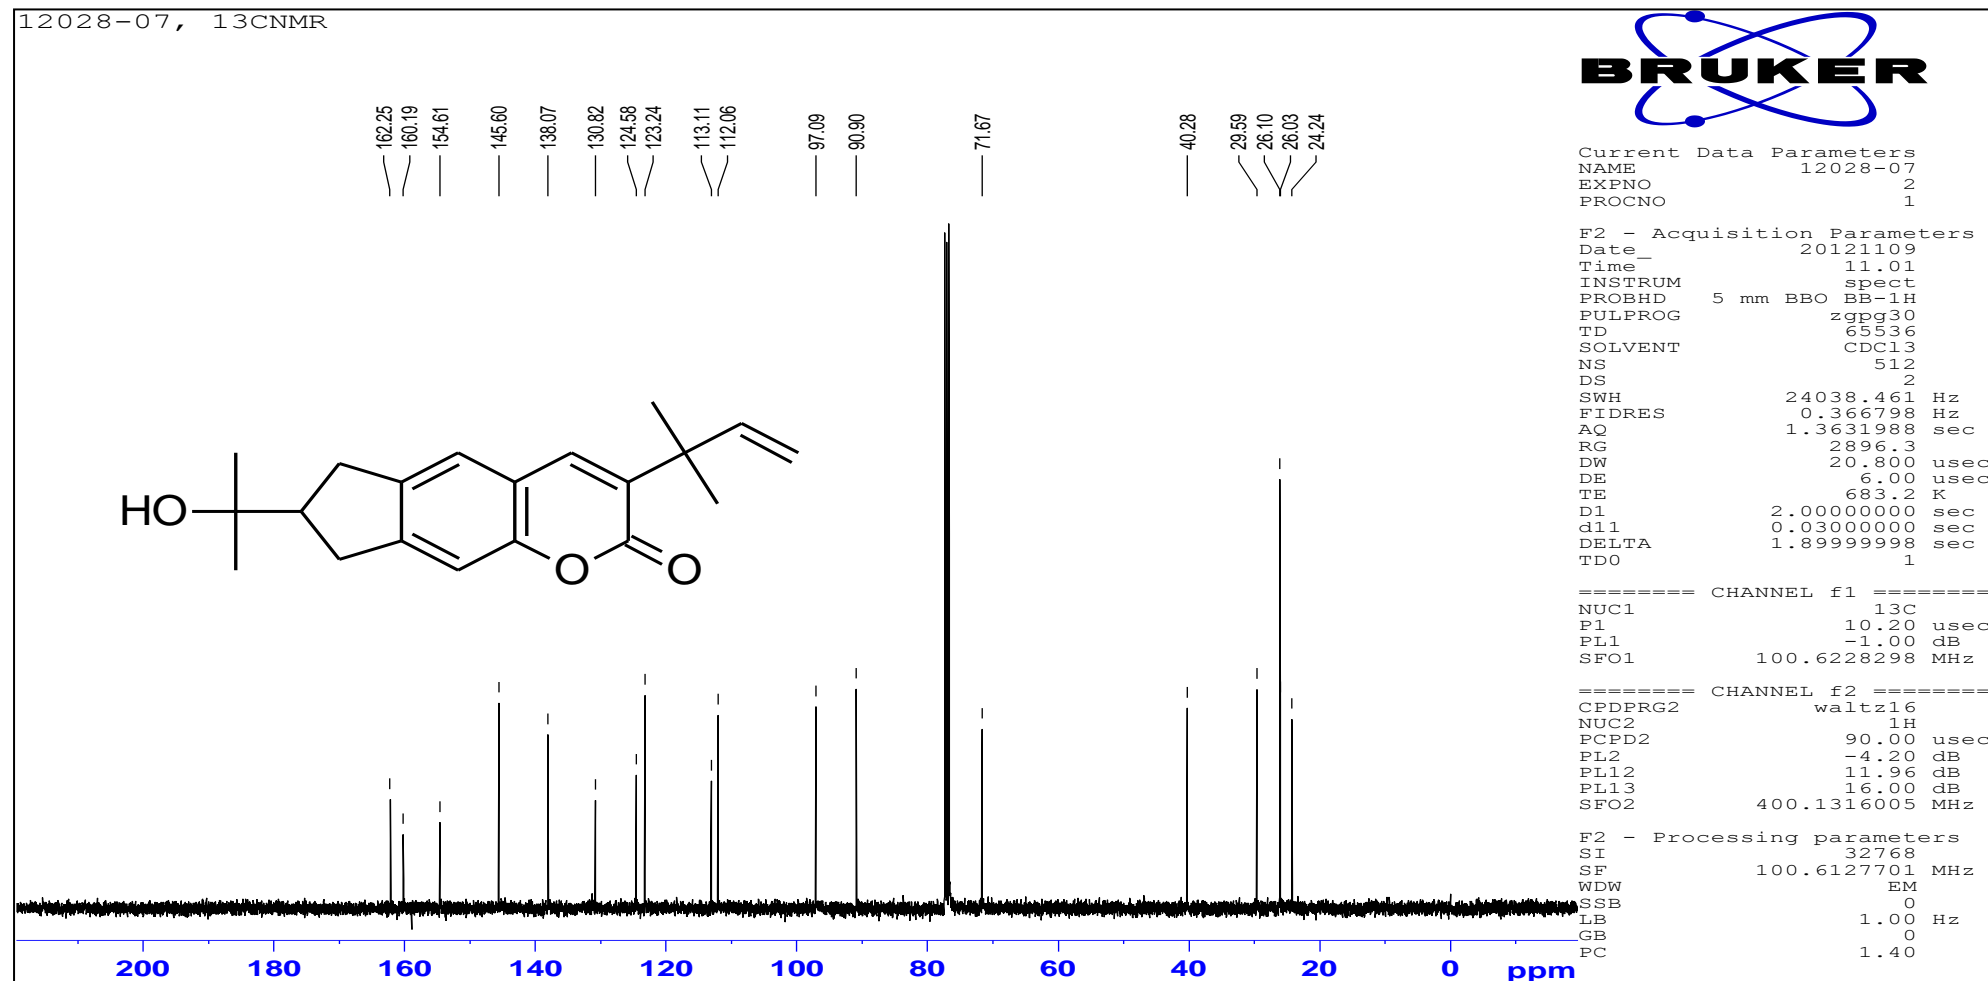

**Figure S21.** <sup>13</sup>C-NMR spectrum of **2**. Obtained by a Bruker Spectrometer Model Advance DPX400, 9.4 Teslas. Operating frequency 100 MHz. (CDCl<sub>3</sub>).

# Spectroscopic analysis of Chalepin 2

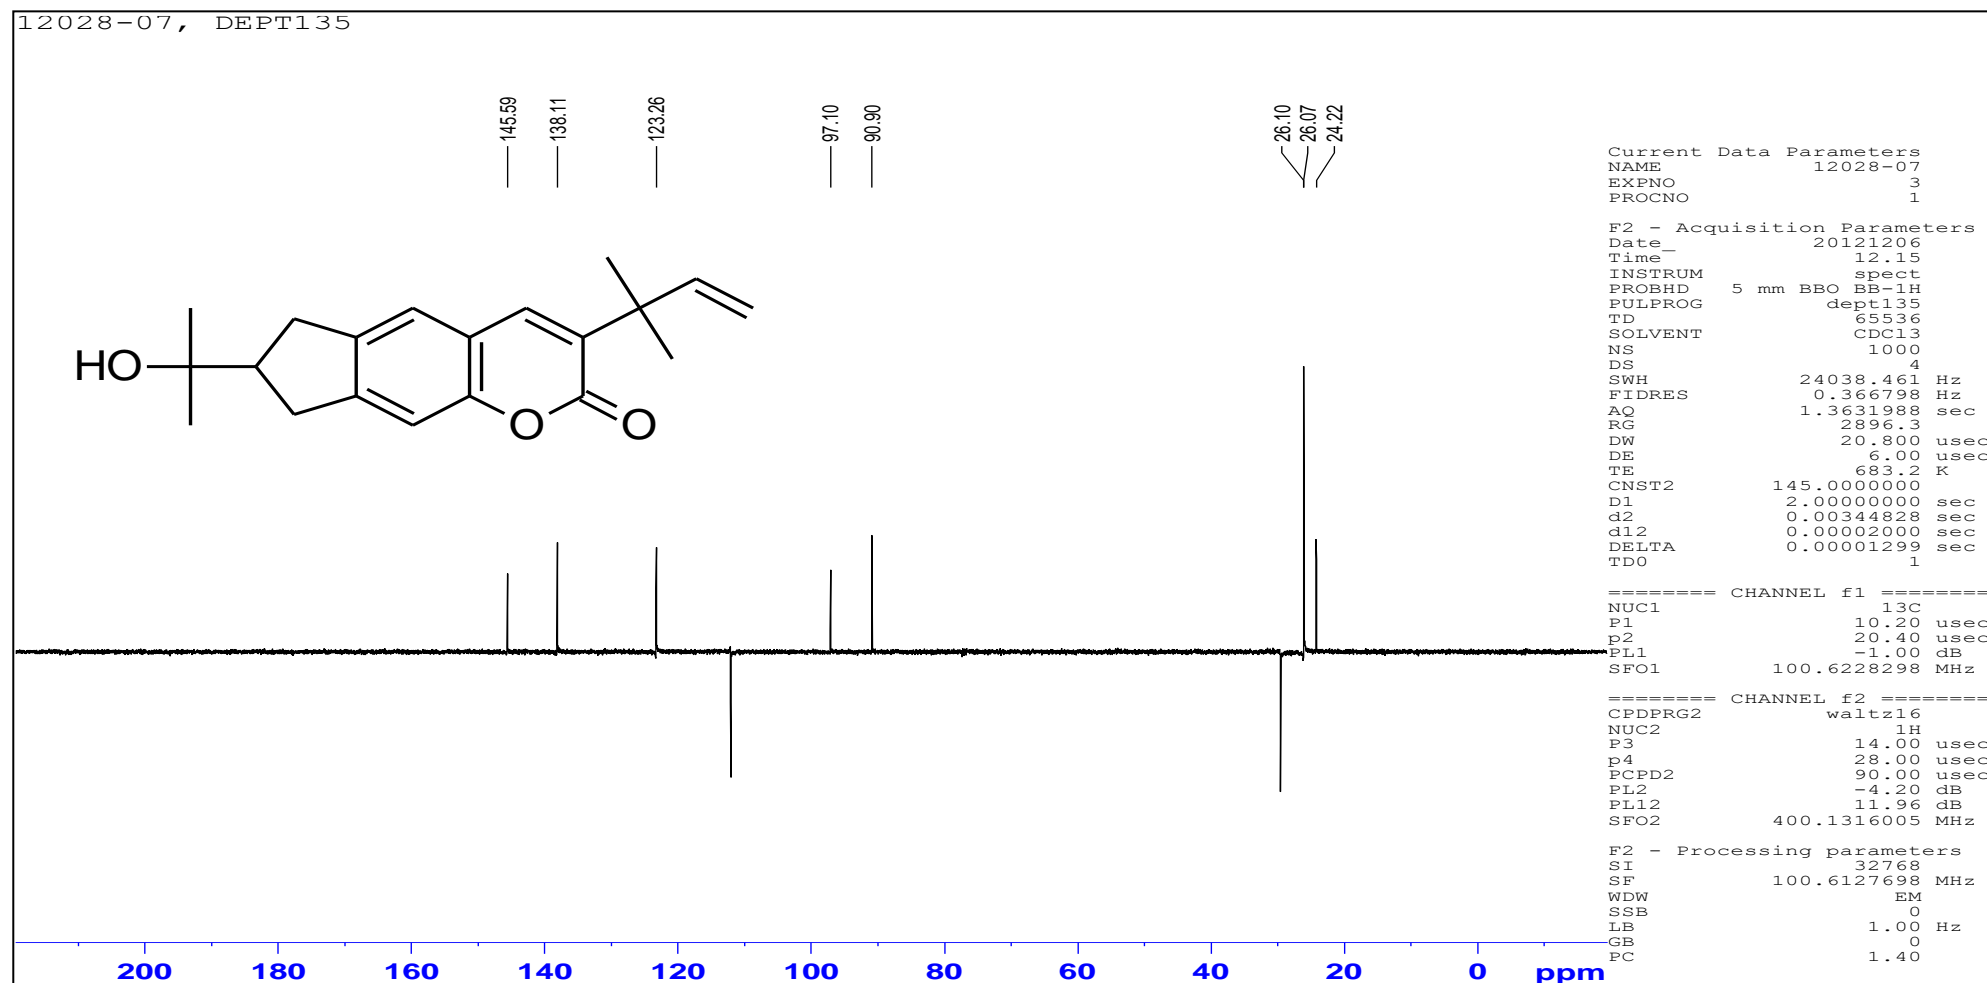

**Figure S22.** DEPT 135 spectrum from  $^{13}\text{C}$ -NMR spectrum of **2**. Obtained by a Bruker Spectrometer Model Advance DPX400, 9.4 Teslas. Operating frequency 100 MHz. ( $\text{CDCl}_3$ ).

# Spectroscopic analysis of Chalepin 2

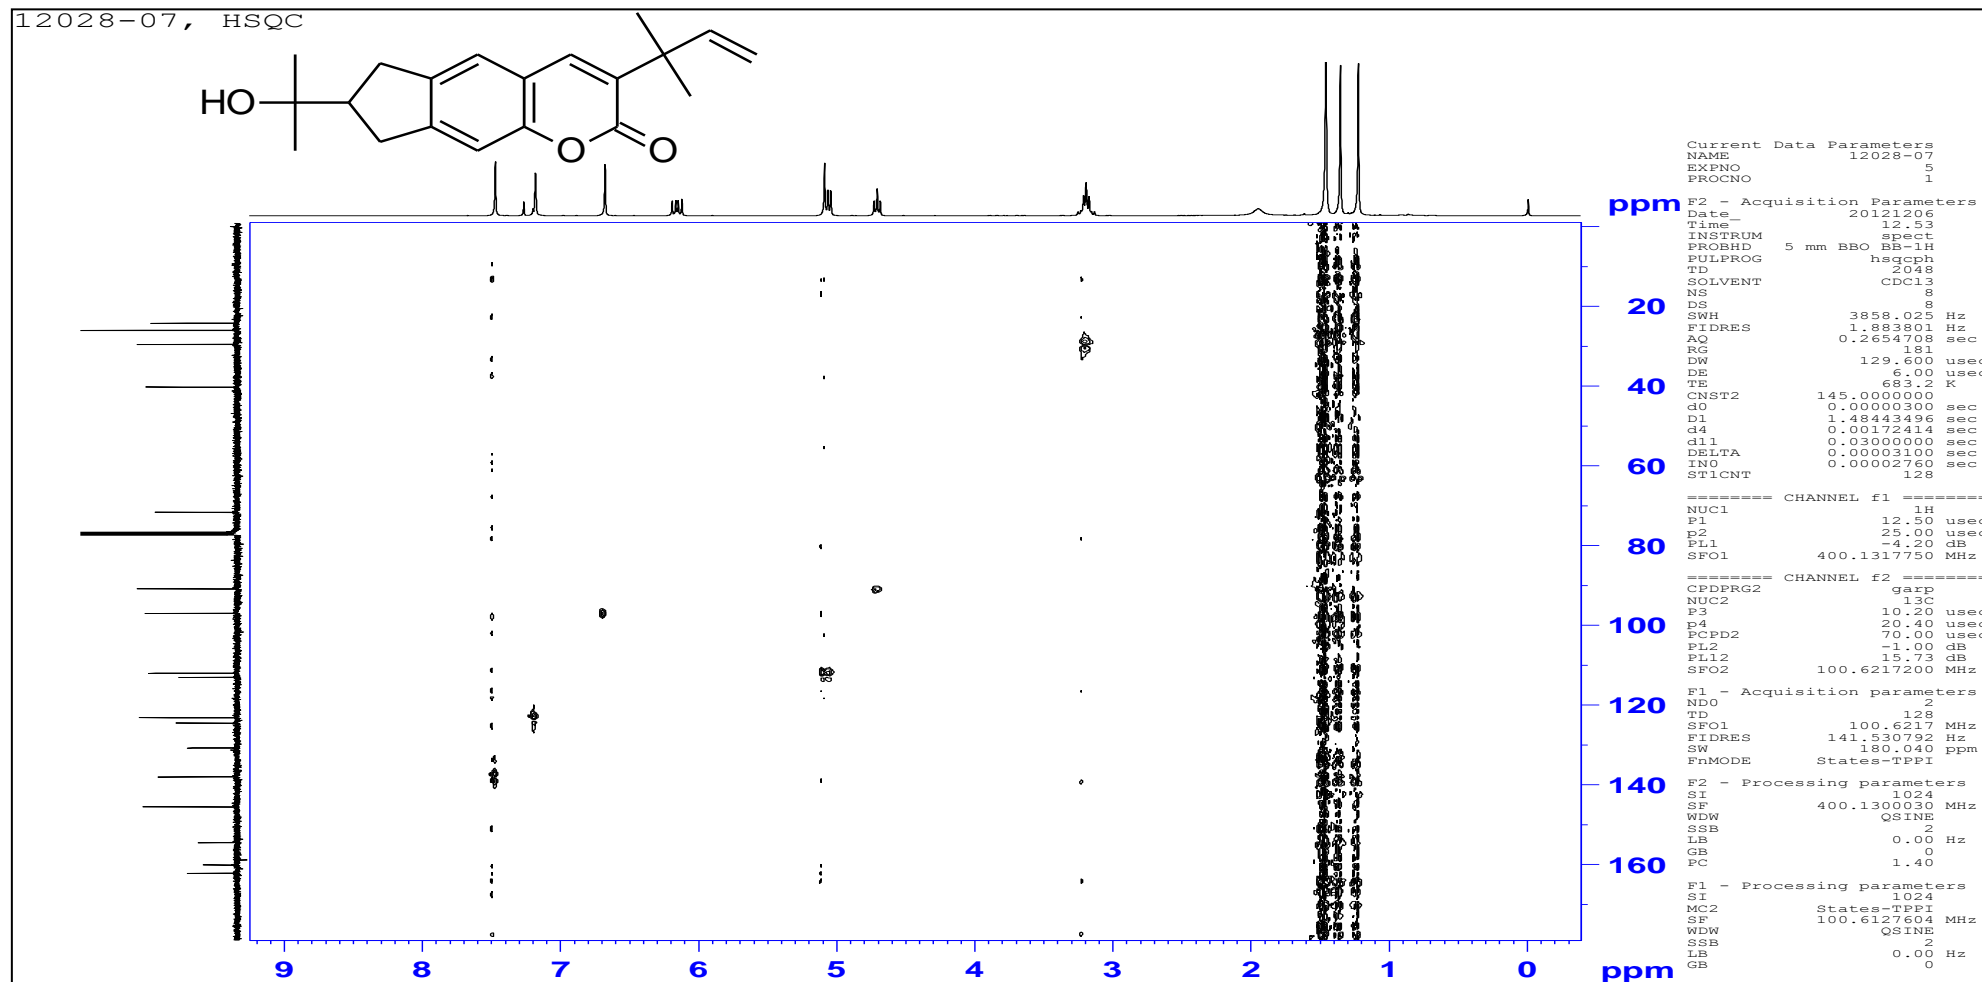

**Figure S23.** HSQC spectrum of **2**. Obtained by a Bruker Spectrometer Model Advance DPX400, 9.4 Teslas. Operating frequency 400 MHz. (CDCl<sub>3</sub>).



# Spectroscopic analysis of Chalepin 2

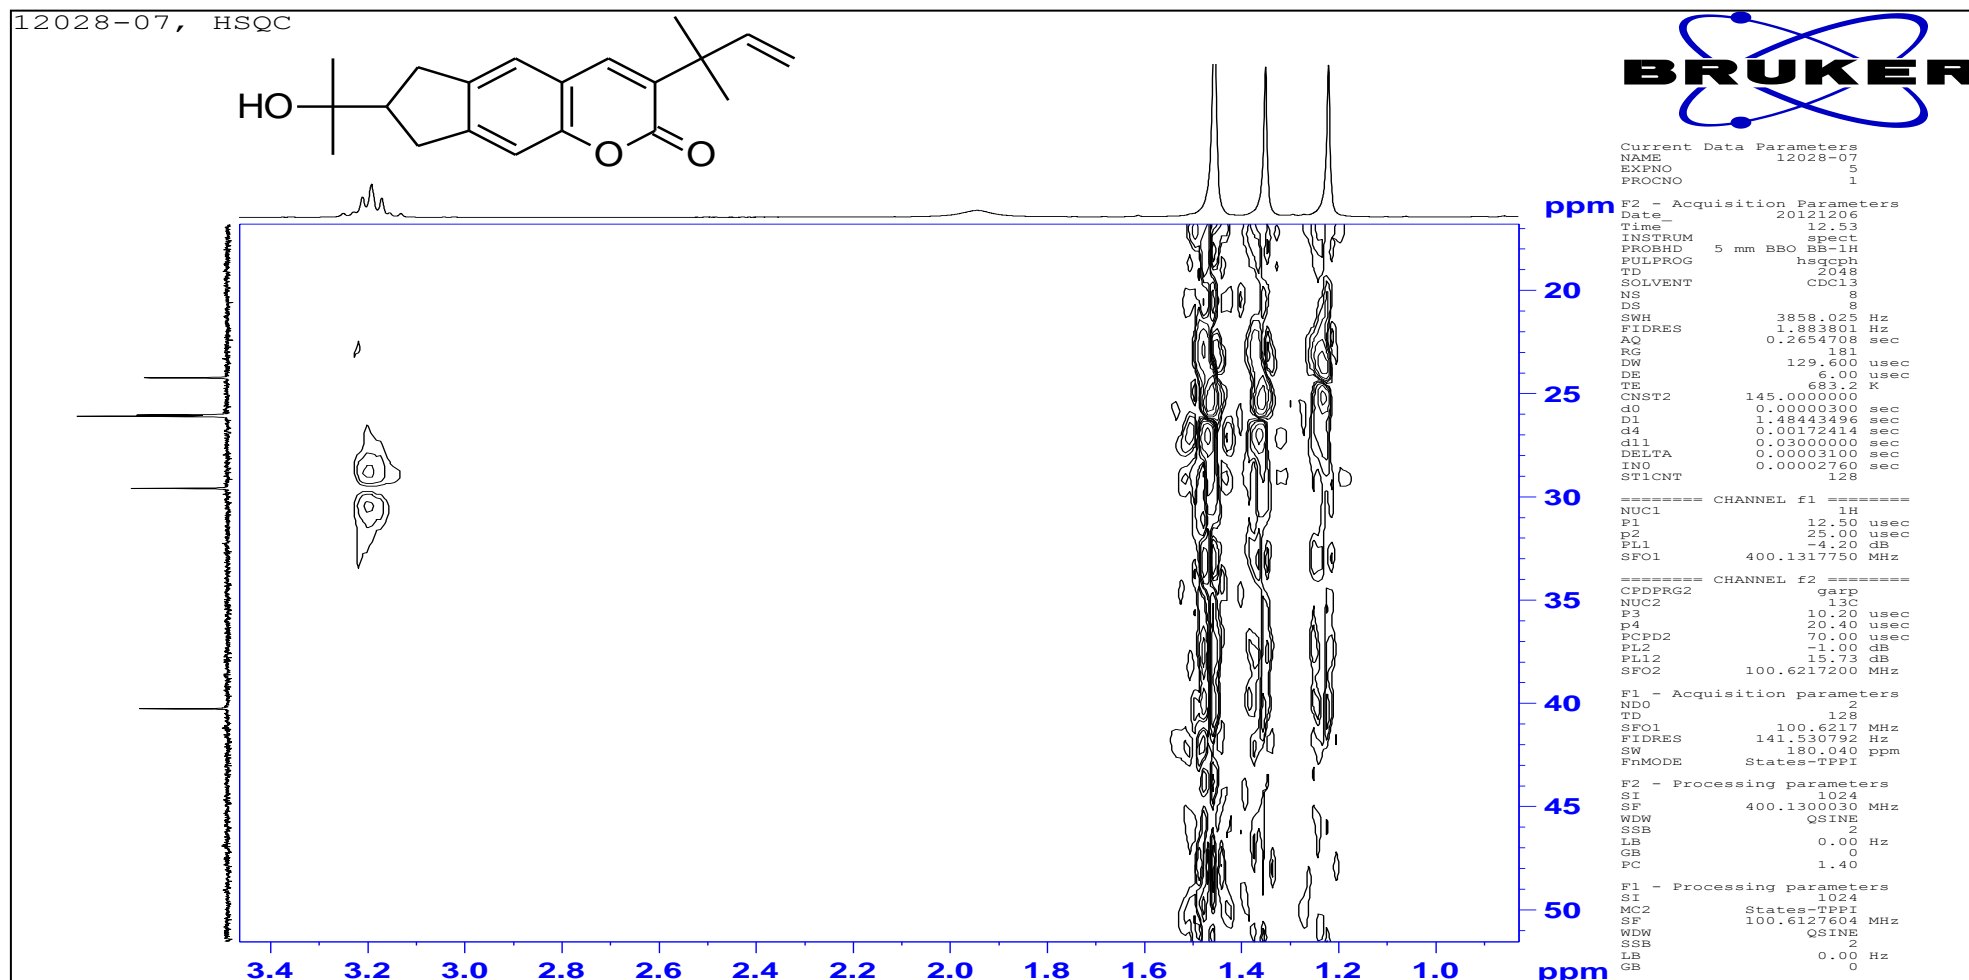

**Figure S24.** Expansion in the area  $^1\text{H}$ : 1.0-3.4 ppm,  $^{13}\text{C}$ : 15-50 ppm. HSQC spectrum of **2**. Obtained by a Bruker Spectrometer Model Advance DPX400, 9.4 Teslas. Operating frequency 400 MHz. ( $\text{CDCl}_3$ ).

# Spectroscopic analysis of Chalepin 2

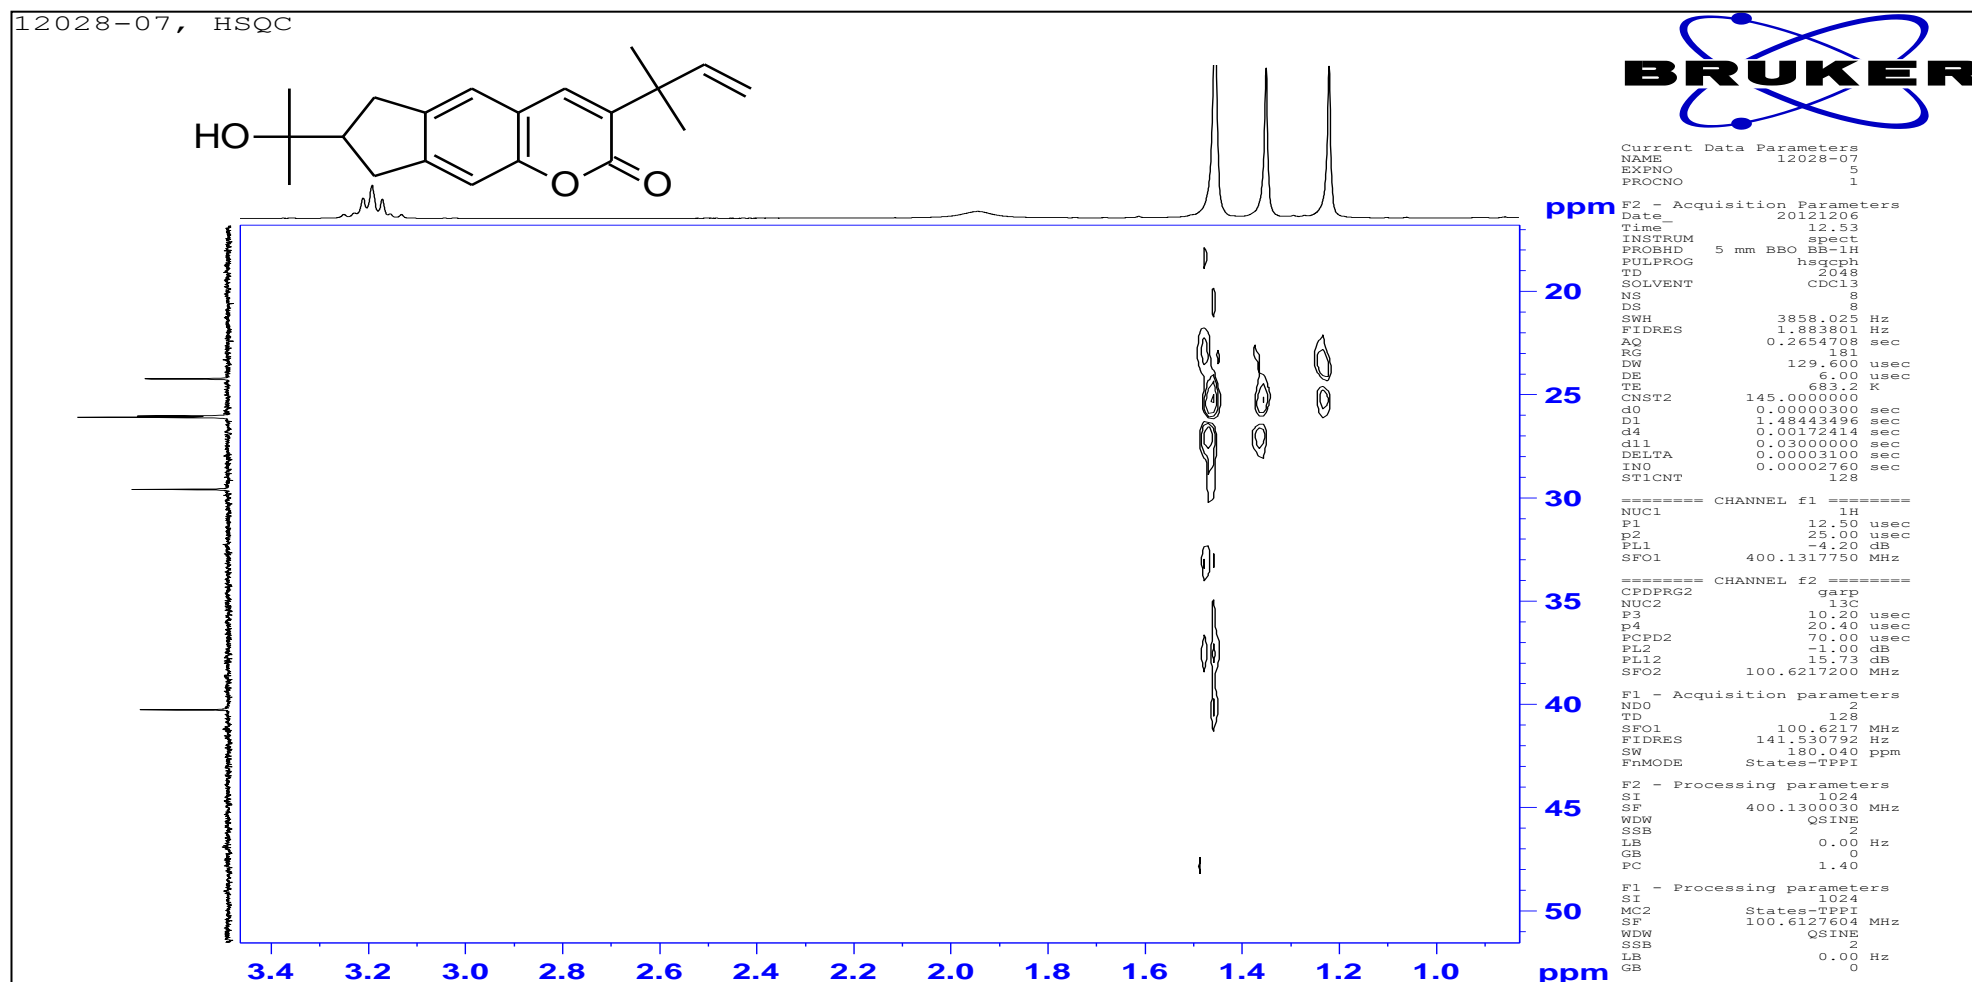

**Figure S25.** Expansion in the area  $^1\text{H}$ : 1.0-3.4 ppm,  $^{13}\text{C}$ : 15-50 ppm. HSQC spectrum of **2**. Obtained by a Bruker Spectrometer Model Advance DPX400, 9.4 Teslas. Operating frequency 400 MHz. ( $\text{CDCl}_3$ ).

# Spectroscopic analysis of Chalepin 2

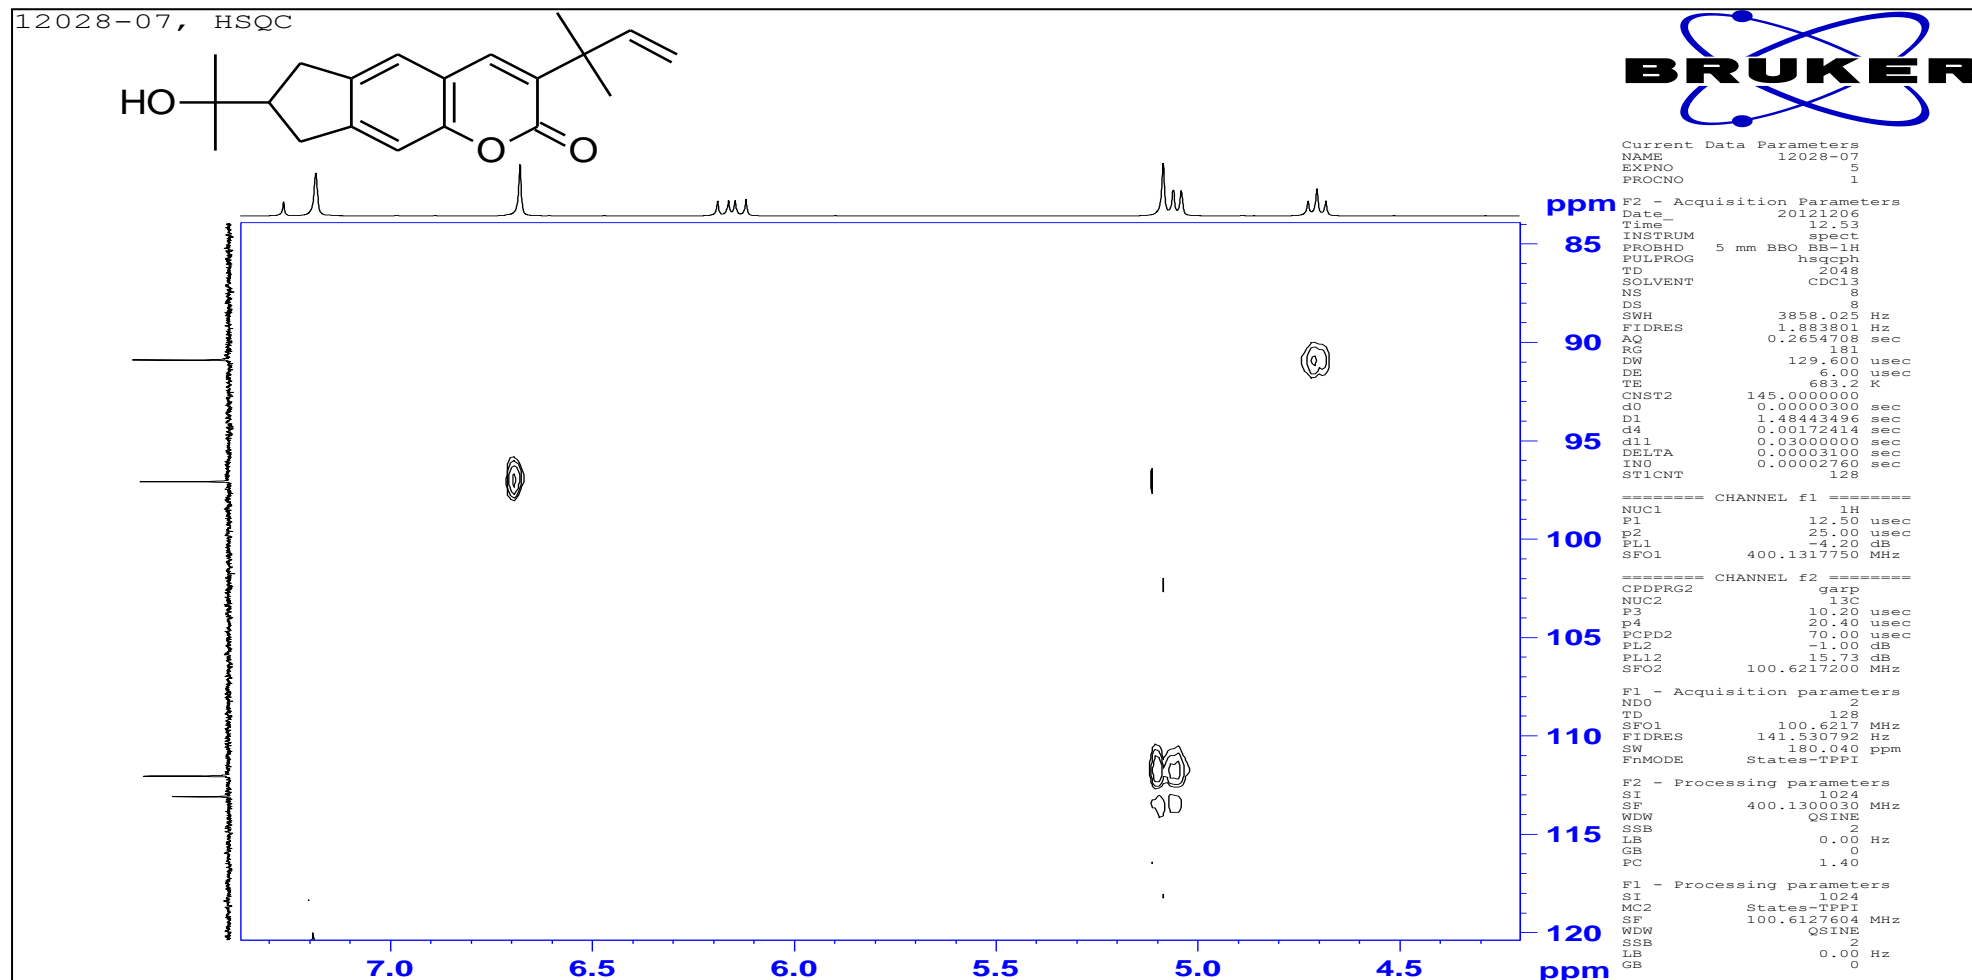

**Figure S26.** Expansion in the area  $^1\text{H}$ : 4.0-7.5 ppm,  $^{13}\text{C}$ : 85-120 ppm. HSQC spectrum of **2**. Obtained by a Bruker Spectrometer Model Advance DPX400, 9.4 Teslas. Operating frequency 400 MHz. ( $\text{CDCl}_3$ ).

# Spectroscopic analysis of Chalepin 2

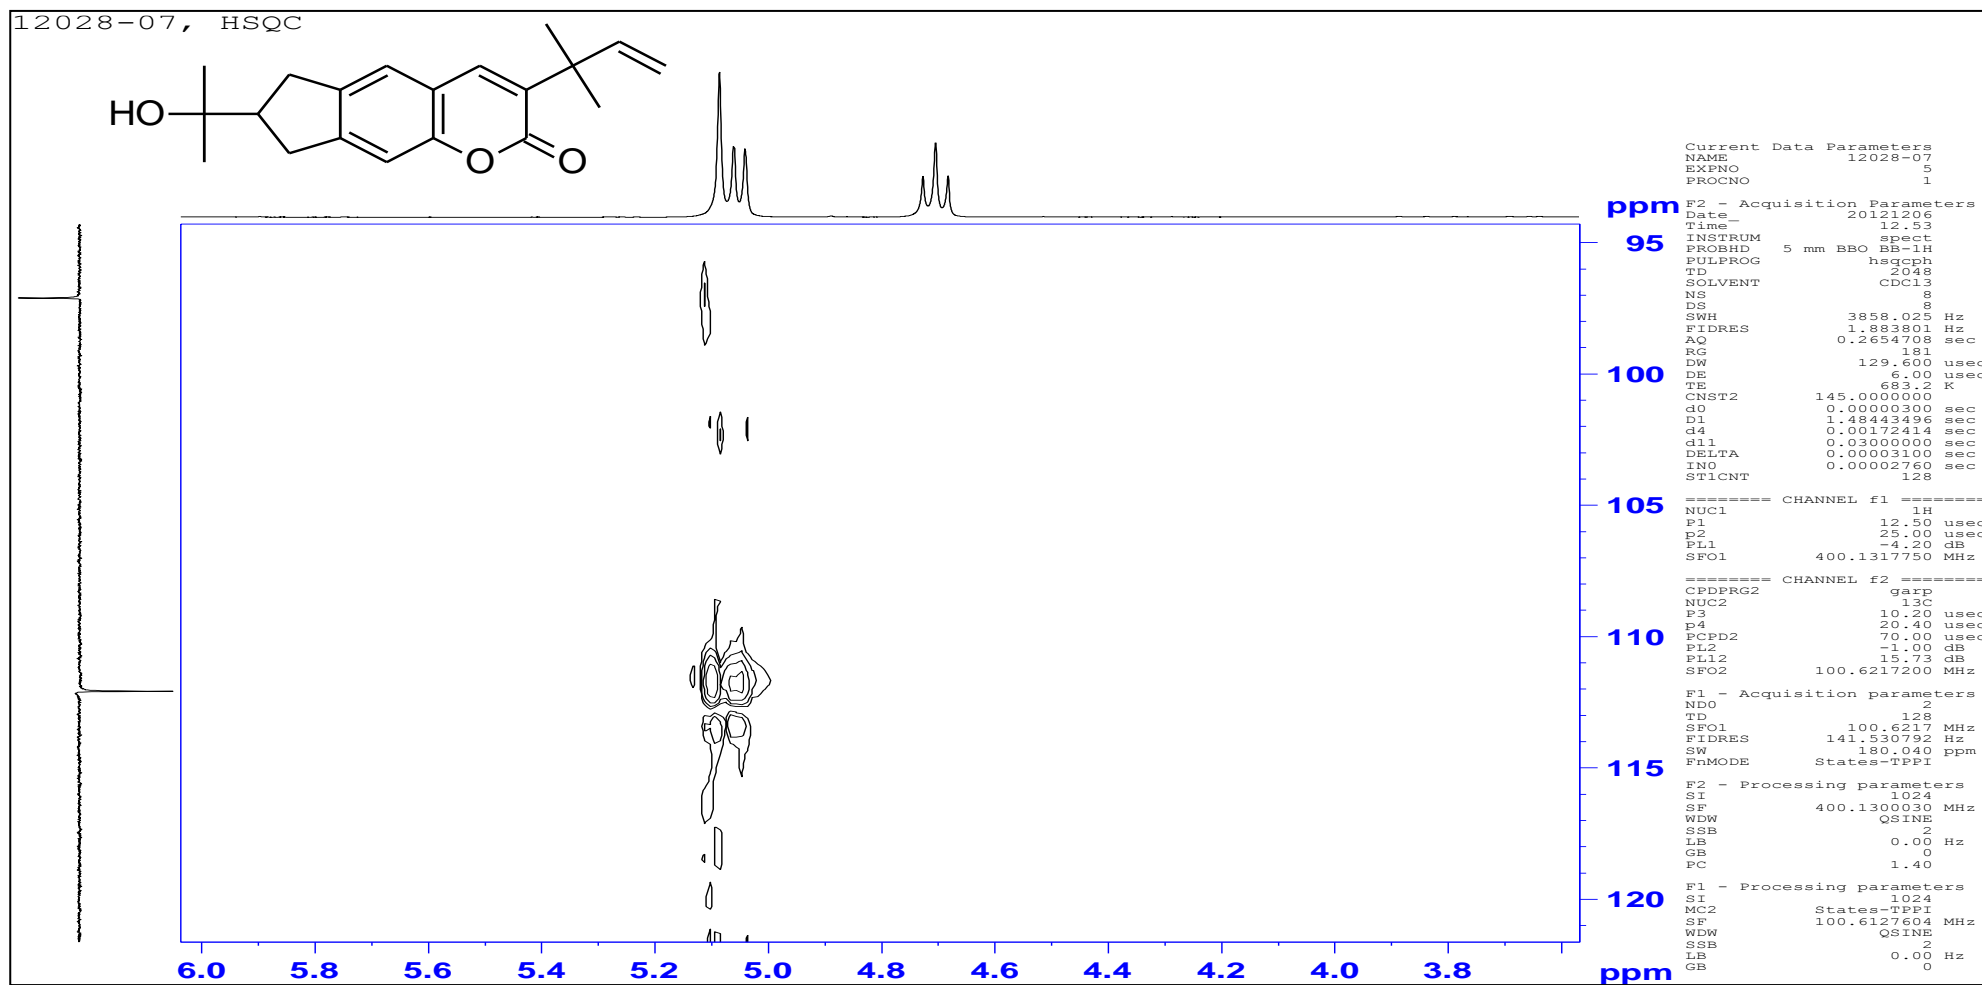

**Figure S27.** Expansion in the area  $^1\text{H}$ : 3.6-6.0 ppm,  $^{13}\text{C}$ : 95-120 ppm. HSQC spectrum of **2**. Obtained by a Bruker Spectrometer Model Advance DPX400, 9.4 Teslas. Operating frequency 400 MHz. ( $\text{CDCl}_3$ ).

# Spectroscopic analysis of Chalepin 2

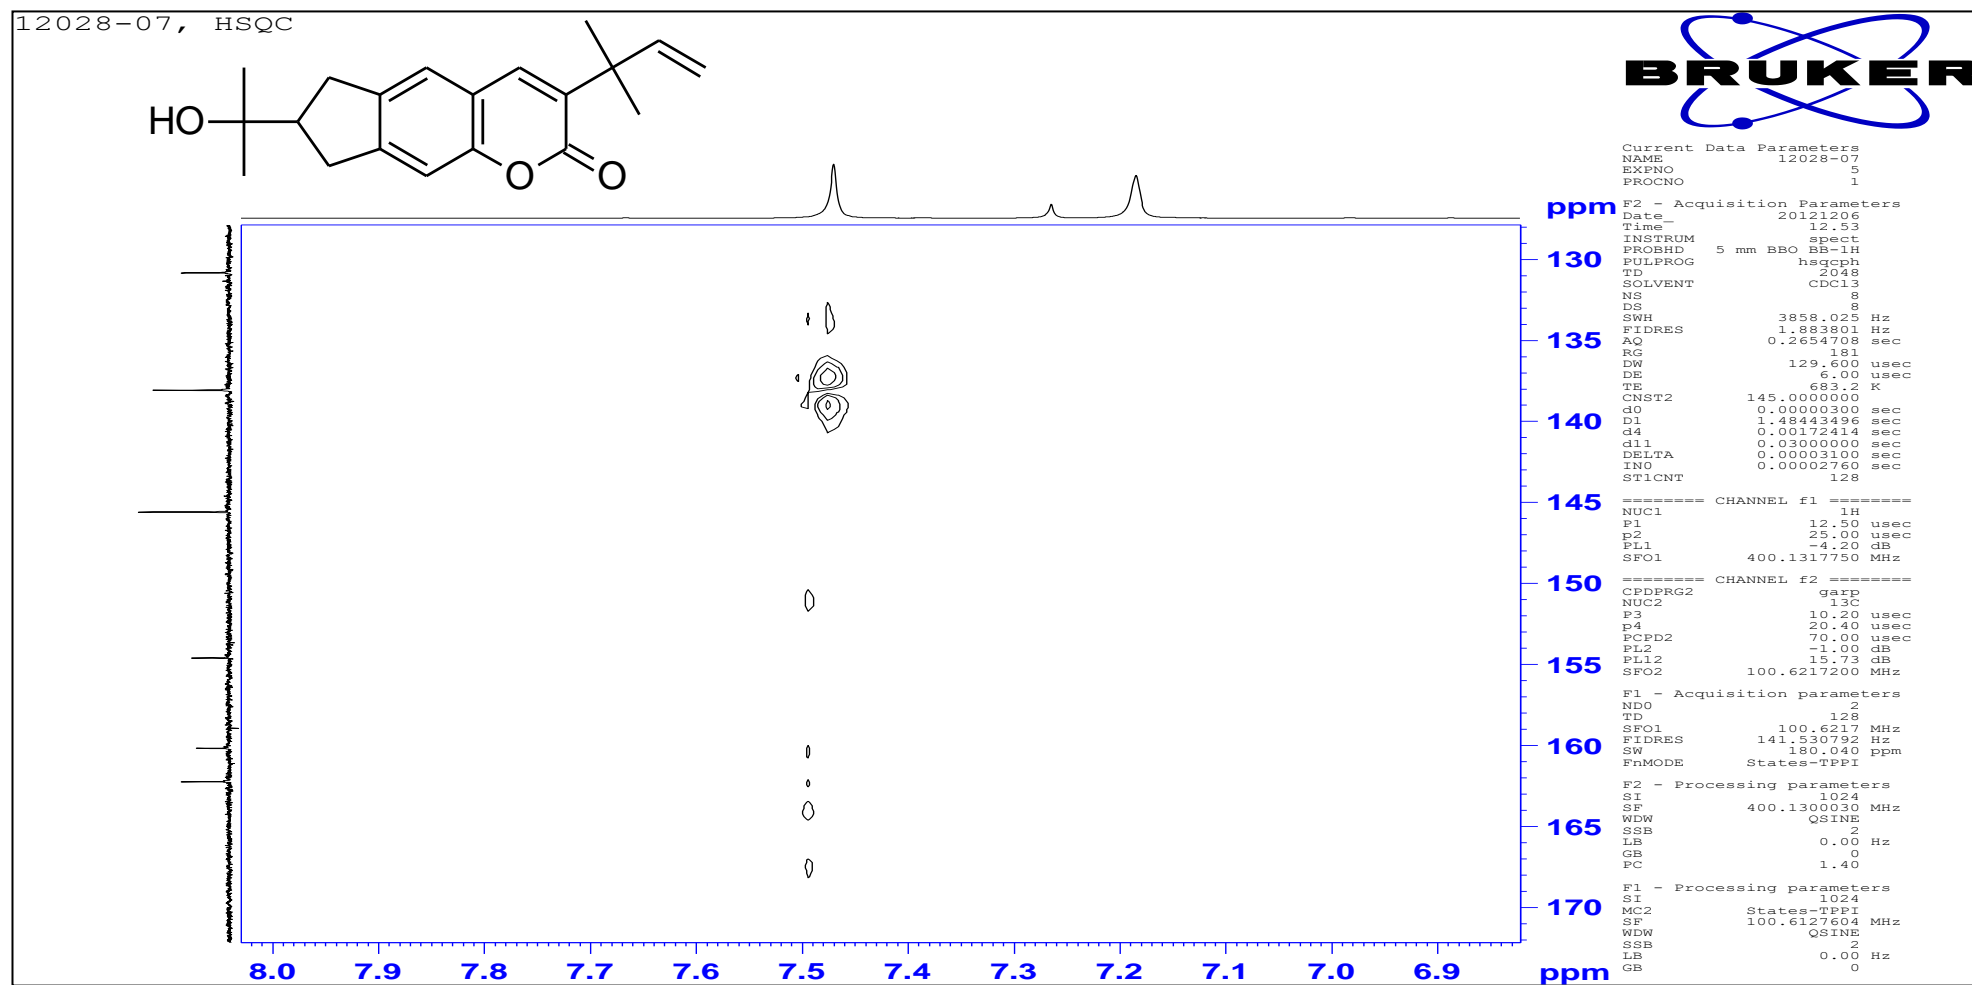

**Figure S28.** Expansion in the area  $^1\text{H}$ : 6.8-8.0 ppm,  $^{13}\text{C}$ : 130-170 ppm. HSQC spectrum of **2**. Obtained by a Bruker Spectrometer Model Advance DPX400, 9.4 Teslas. Operating frequency 400 MHz. ( $\text{CDCl}_3$ ).

# Spectroscopic analysis of Chalepin 2

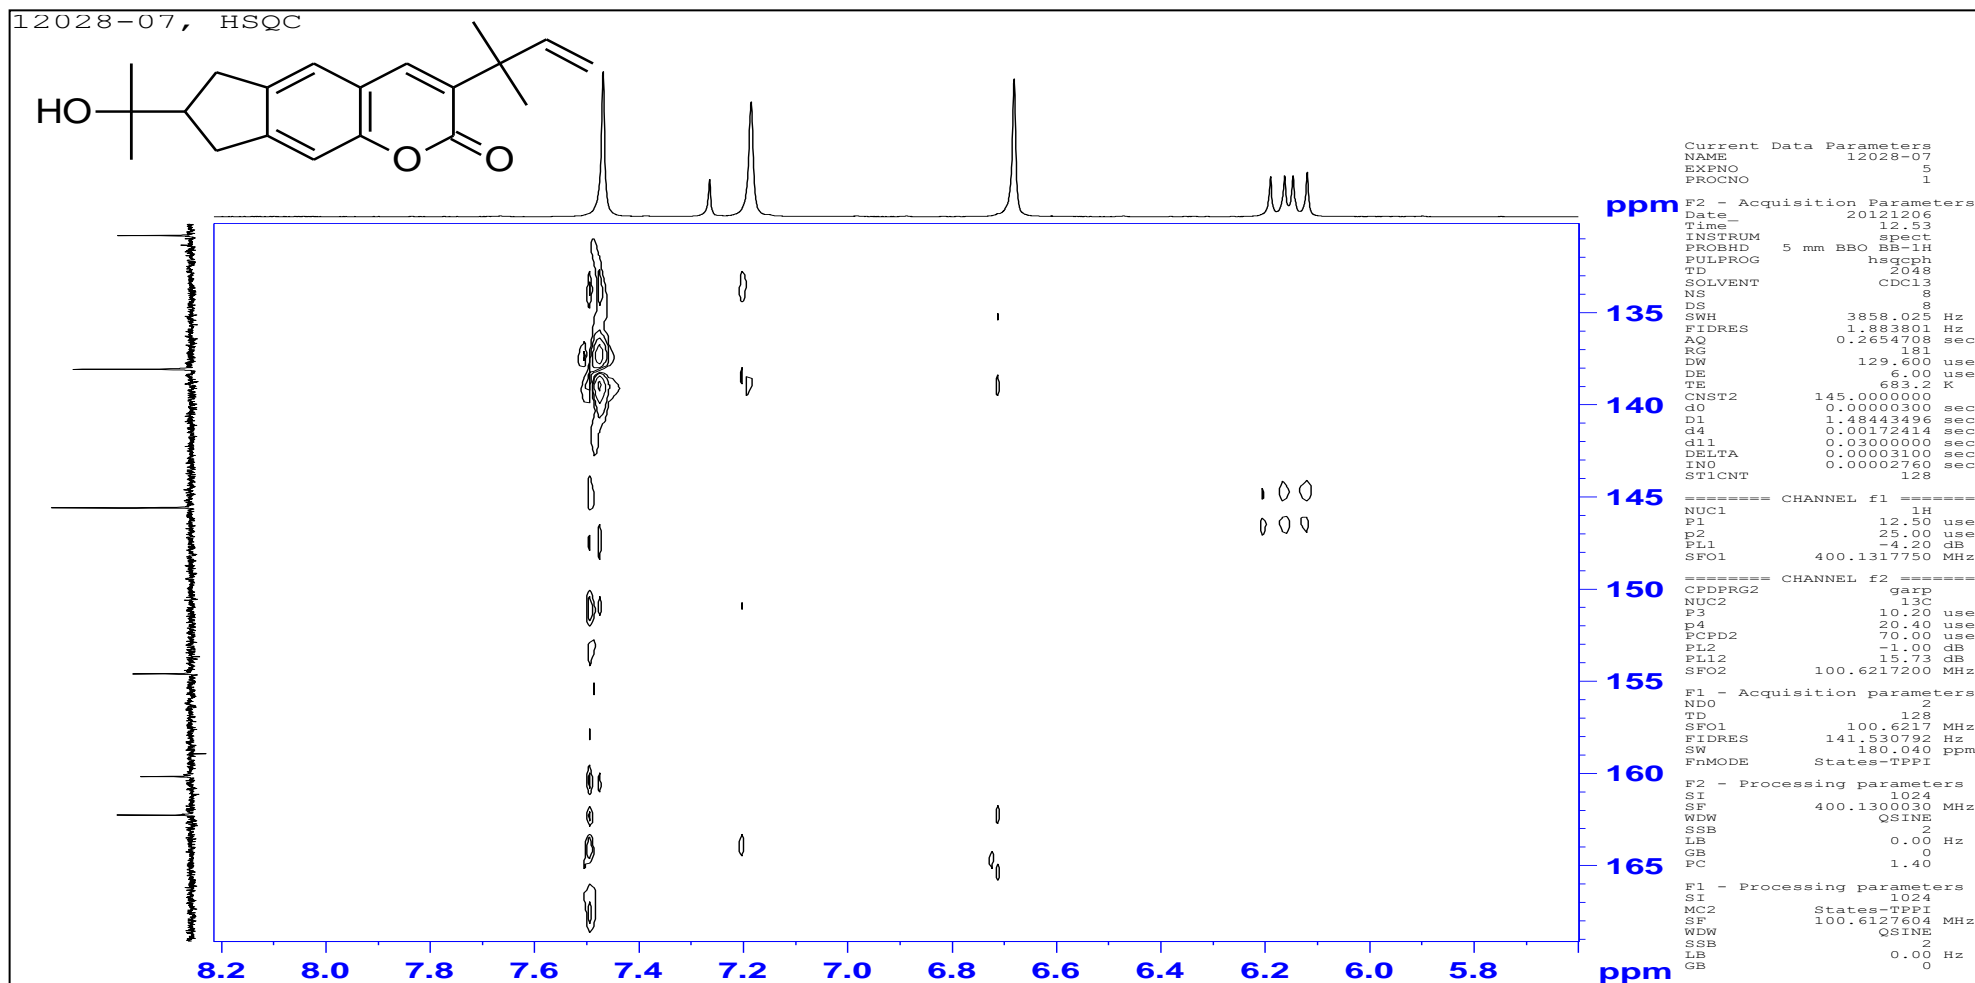

**Figure S29.** Expansion in the area  $^1\text{H}$ : 5.6-8.2 ppm,  $^{13}\text{C}$ : 130-170 ppm. HSQC spectrum of **2**. Obtained by a Bruker Spectrometer Model Advance DPX400, 9.4 Teslas. Operating frequency 400 MHz. ( $\text{CDCl}_3$ ).

## Spectroscopic analysis of Chalepin 2

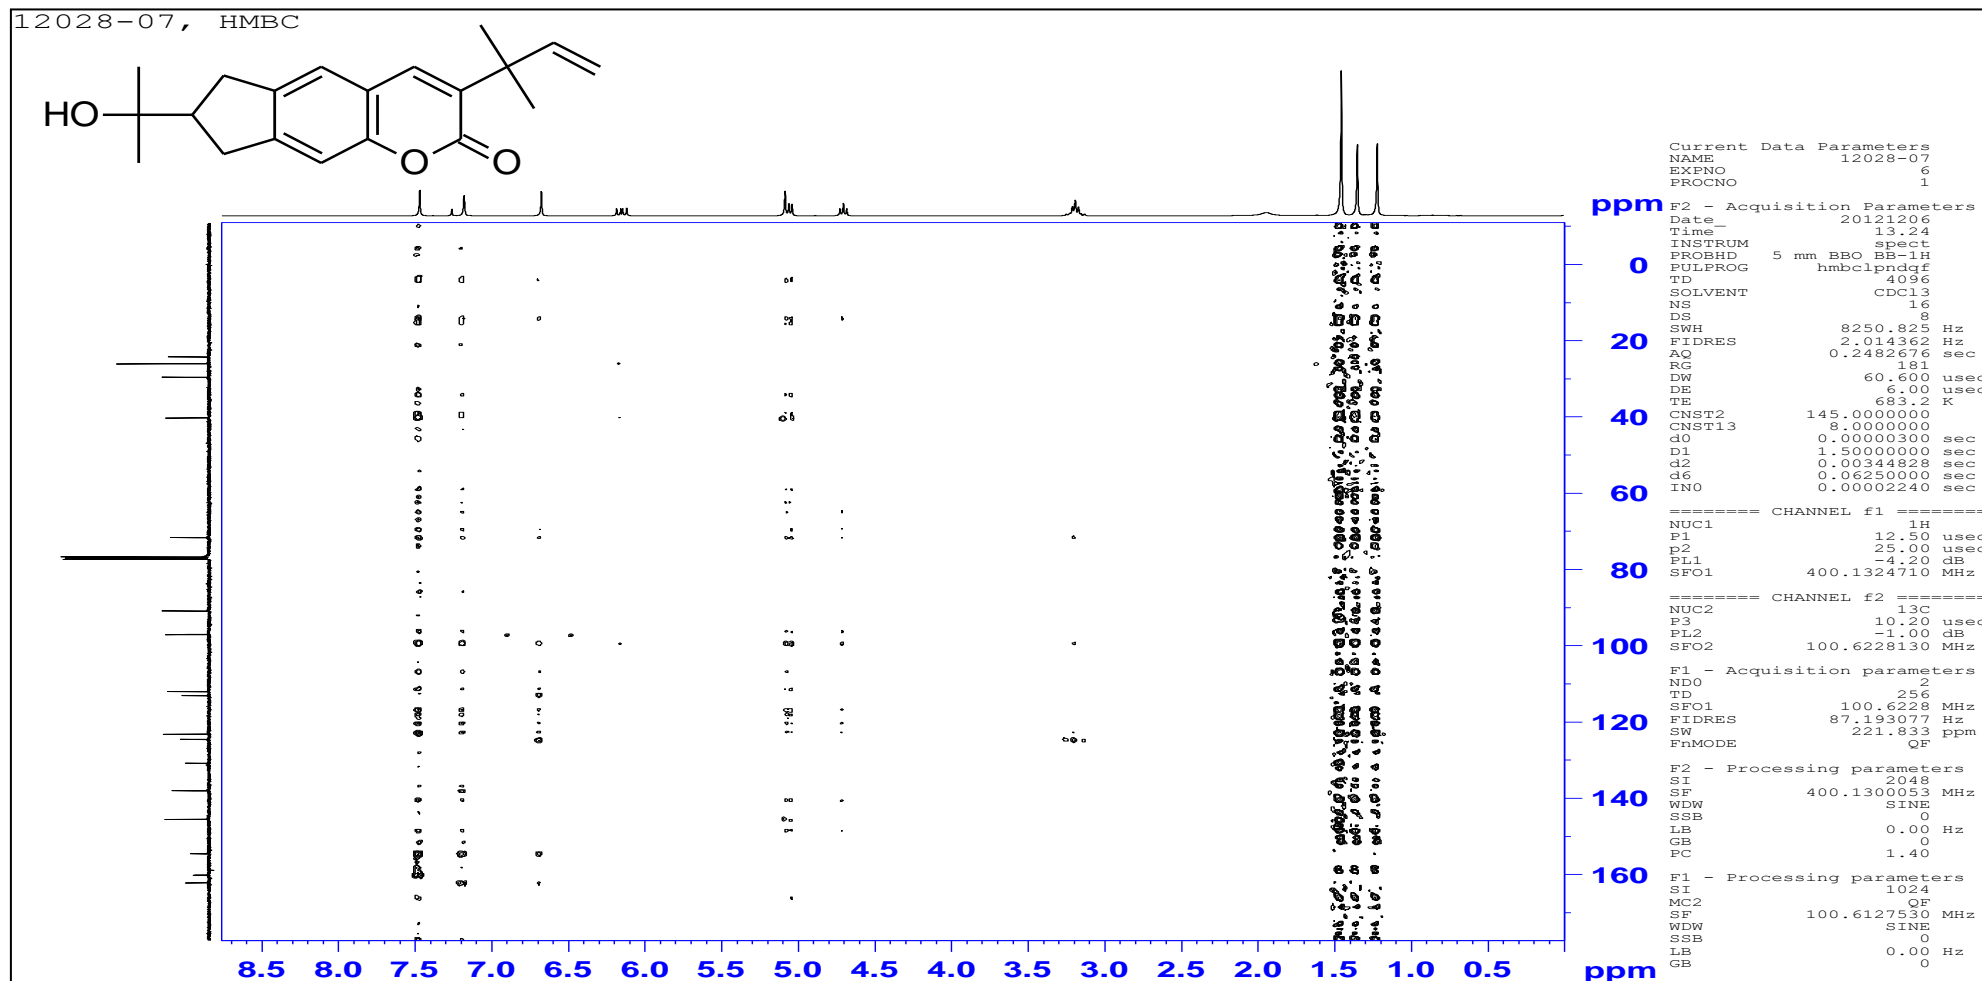

**Figure S30.** HMBC spectrum of **2**. Obtained by a Bruker Spectrometer Model Advance DPX400, 9.4 Teslas. Operating frequency 400 MHz. (CDCl<sub>3</sub>).

# Spectroscopic analysis of Chalepin 2

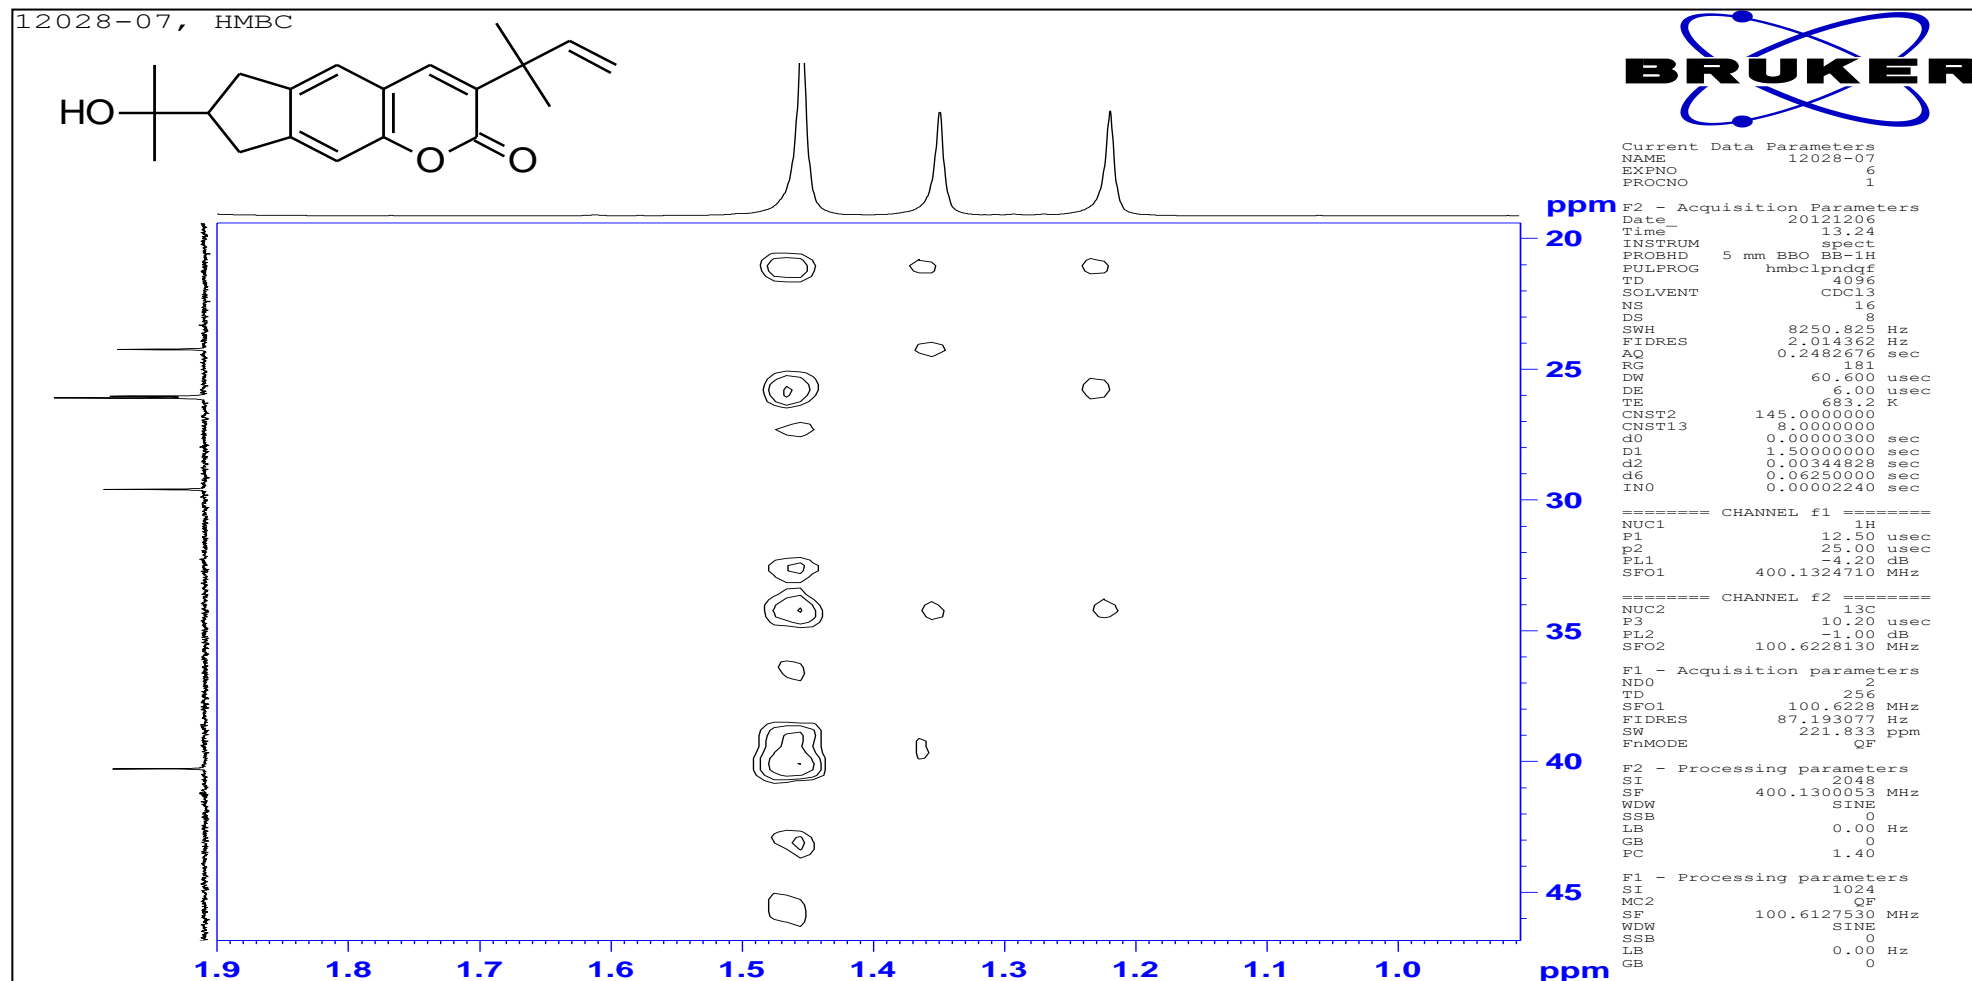

**Figure S31.** Expansion in the area  $^1\text{H}$ : 0.9-1.9 ppm,  $^{13}\text{C}$ : 20-45 ppm. HMBC spectrum of **2**. Obtained by a Bruker Spectrometer Model Advance DPX400, 9.4 Teslas. Operating frequency 400 MHz. ( $\text{CDCl}_3$ ).



# Spectroscopic analysis of Chalepin 2

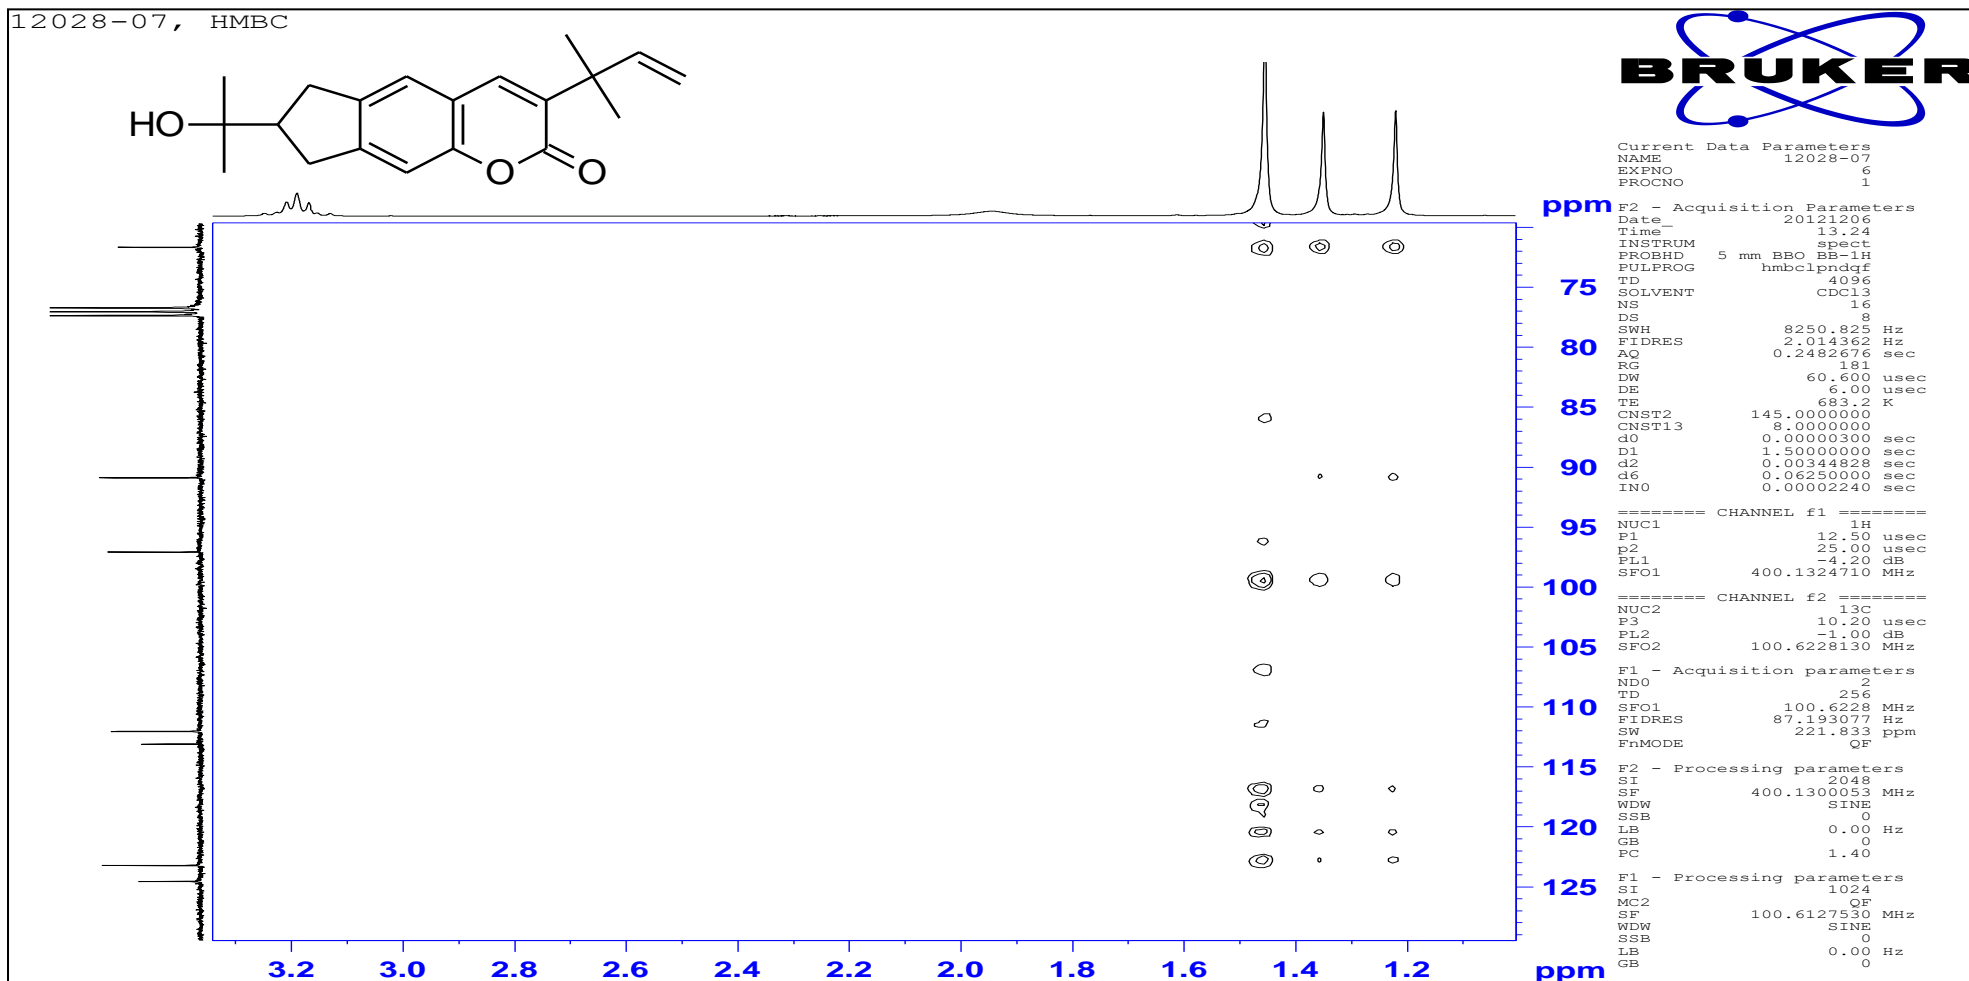

**Figure S32.** Expansion in the area  $^1\text{H}$ : 1.0-3.4 ppm,  $^{13}\text{C}$ : 70-130 ppm. HMBC spectrum of **2**. Obtained by a Bruker Spectrometer Model Advance DPX400, 9.4 Teslas. Operating frequency 400 MHz. ( $\text{CDCl}_3$ ).

# Spectroscopic analysis of Chalepin 2

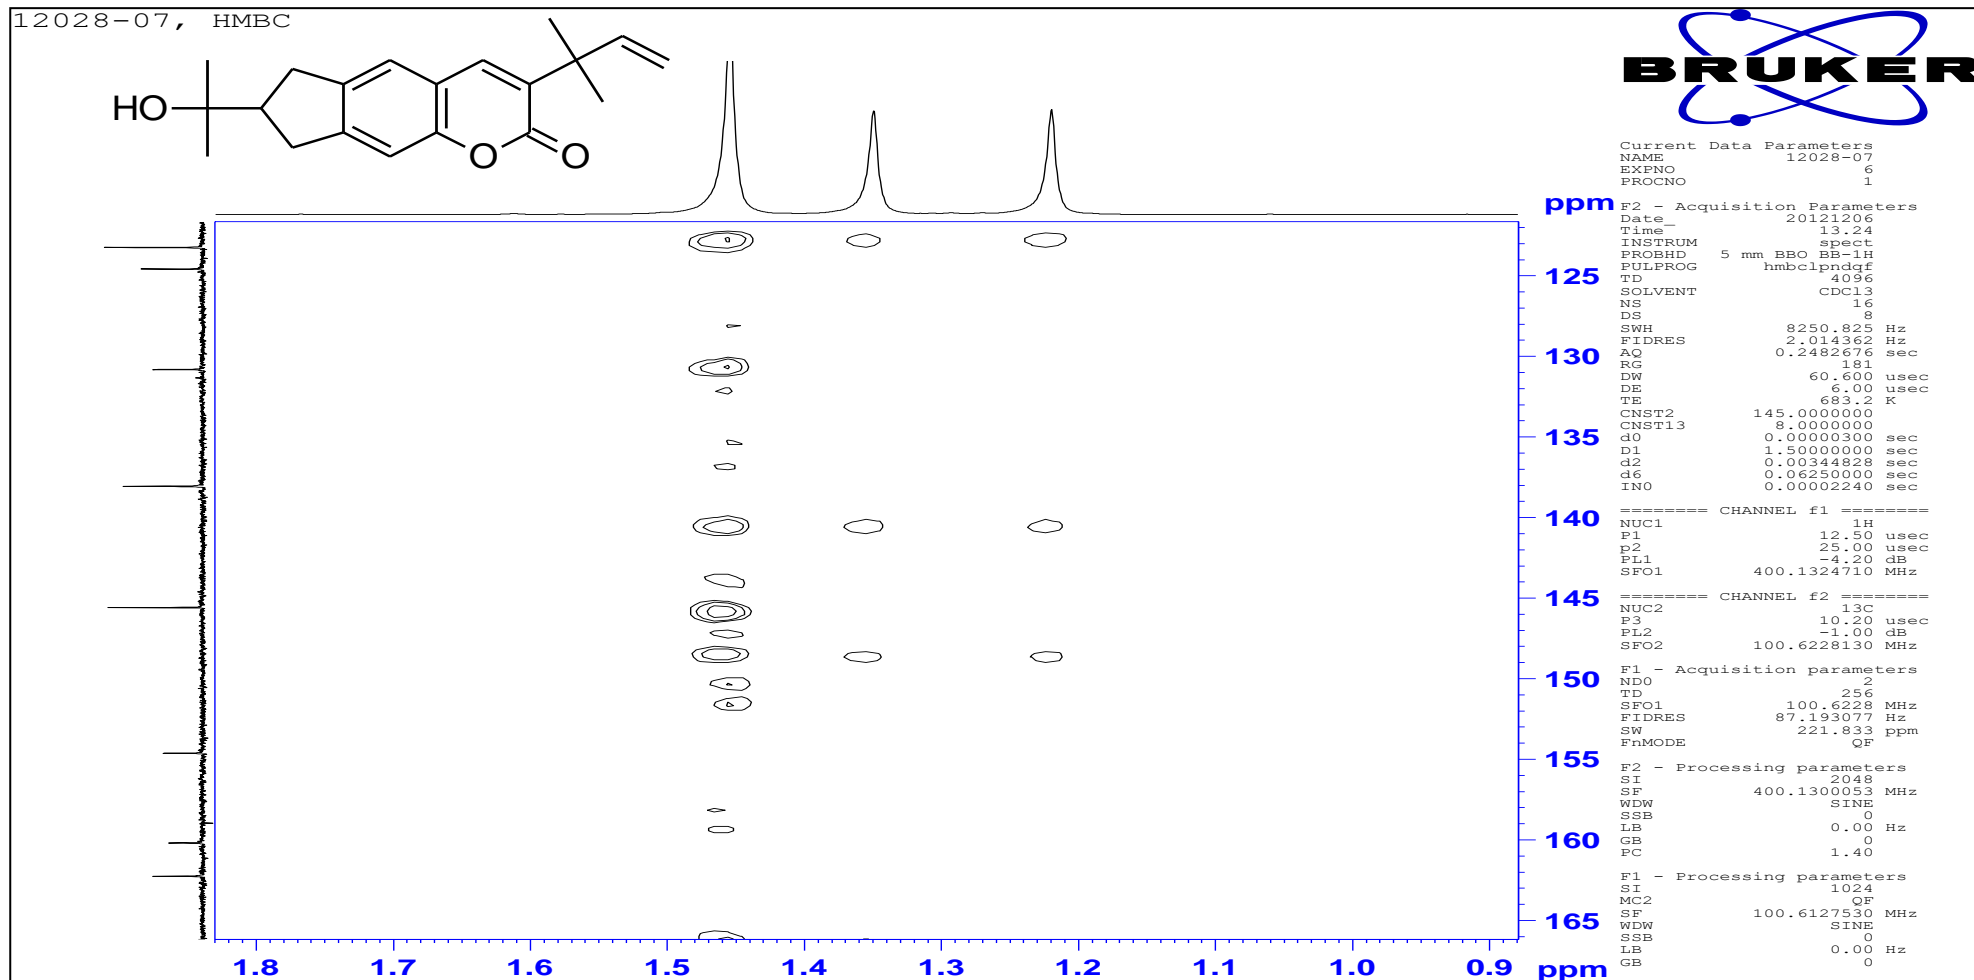

**Figure S33.** Expansion in the area  $^1\text{H}$ : 0.9-1.8 ppm,  $^{13}\text{C}$ : 120-185 ppm. HMBC spectrum of **2**. Obtained by a Bruker Spectrometer Model Advance DPX400, 9.4 Teslas. Operating frequency 400 MHz. ( $\text{CDCl}_3$ ).

# Spectroscopic analysis of Chalepin 2

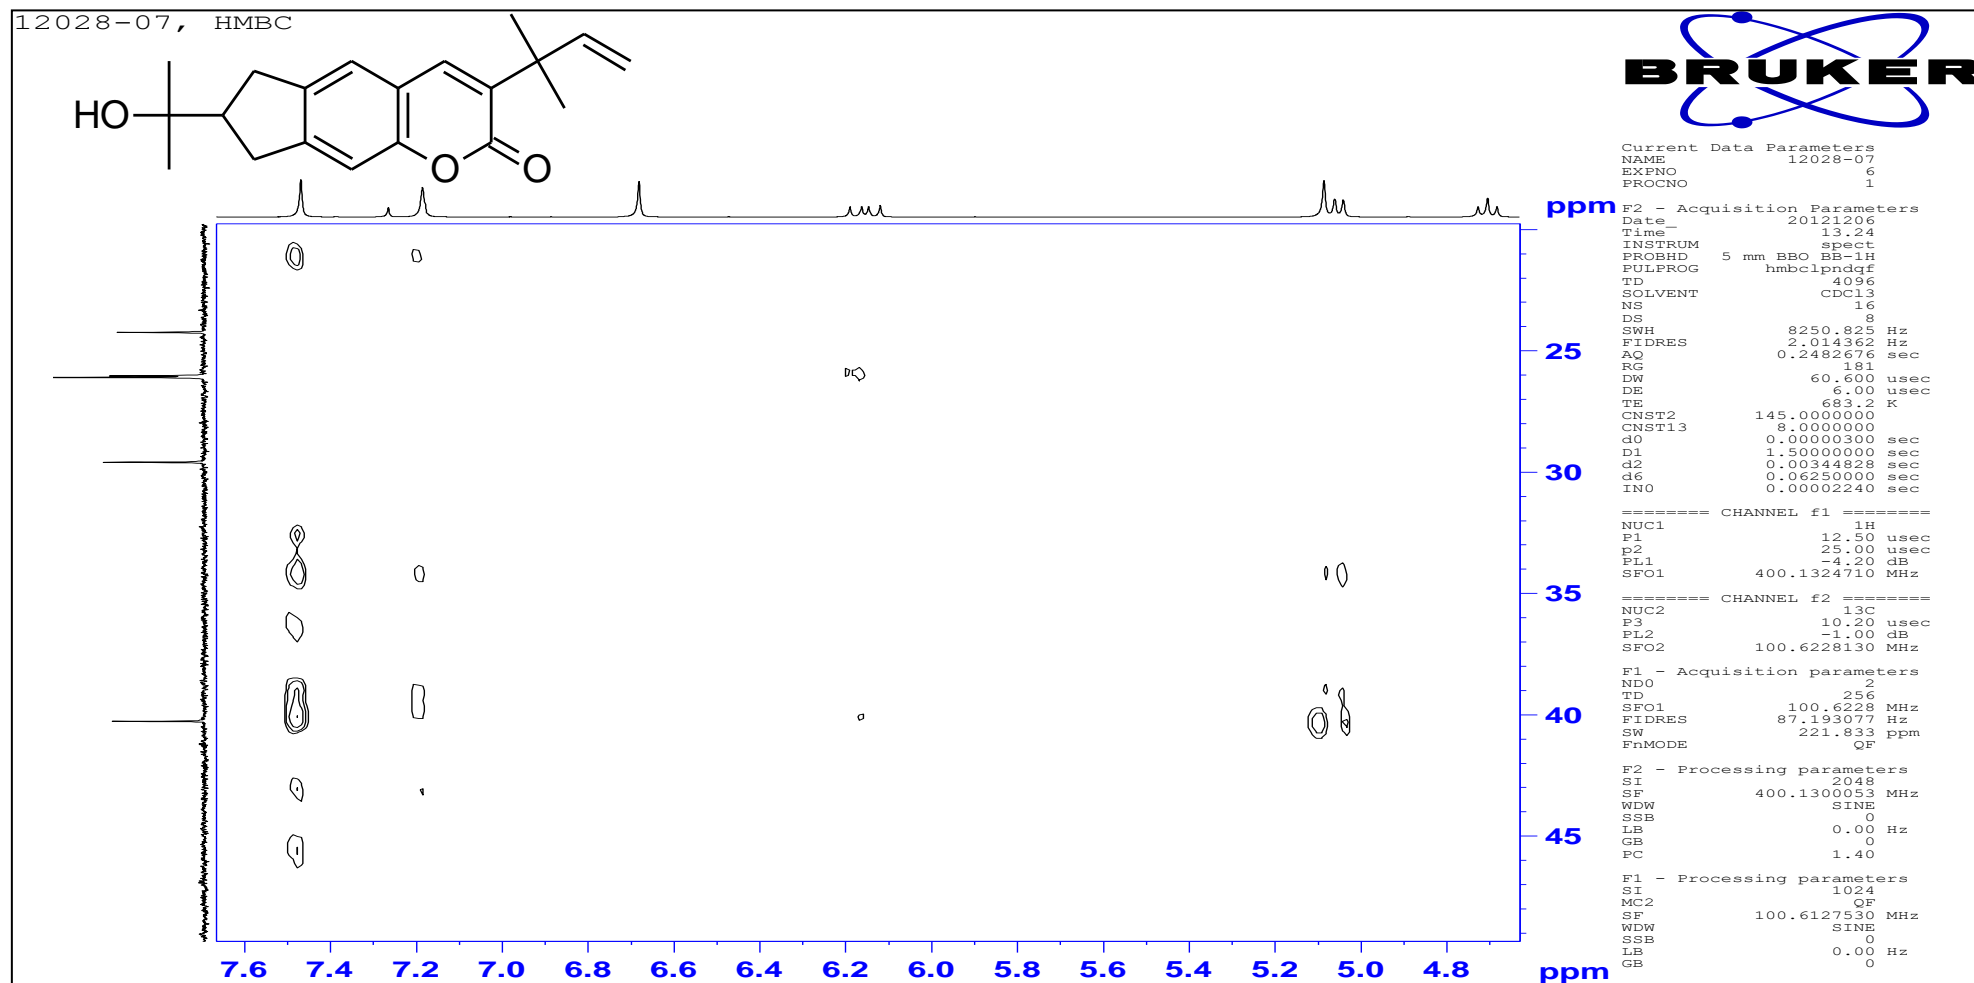

**Figure S34.** Expansion in the area  $^1\text{H}$ : 4.6-7.6 ppm,  $^{13}\text{C}$ : 20-50 ppm. HMBC spectrum of **2**. Obtained by a Bruker Spectrometer Model Advance DPX400, 9.4 Teslas. Operating frequency 400 MHz. ( $\text{CDCl}_3$ ).

# Spectroscopic analysis of Chalepin 2

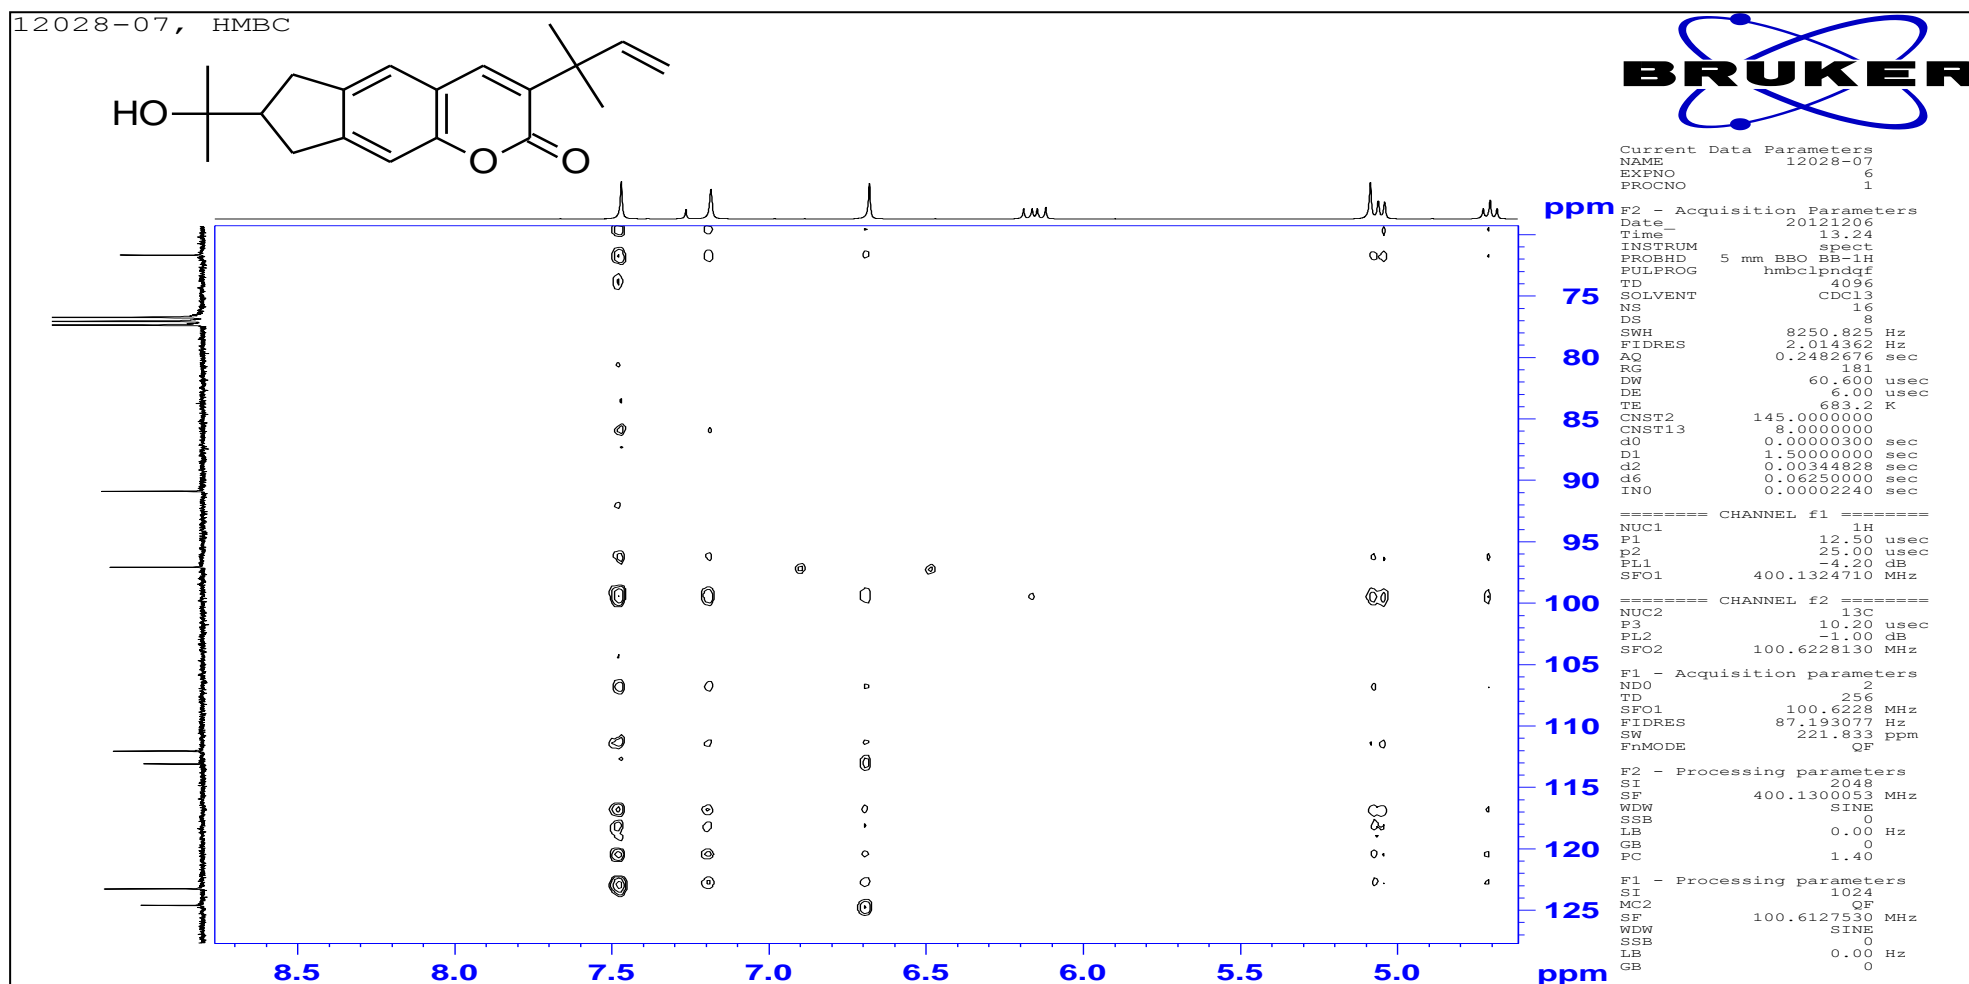

**Figure S35.** Expansion in the area  $^1\text{H}$ : 4.6-8.5 ppm,  $^{13}\text{C}$ : 70-128 ppm. HMBC spectrum of **2**. Obtained by a Bruker Spectrometer Model Advance DPX400, 9.4 Teslas. Operating frequency 400 MHz. ( $\text{CDCl}_3$ ).

# Spectroscopic analysis of Chalepin 2

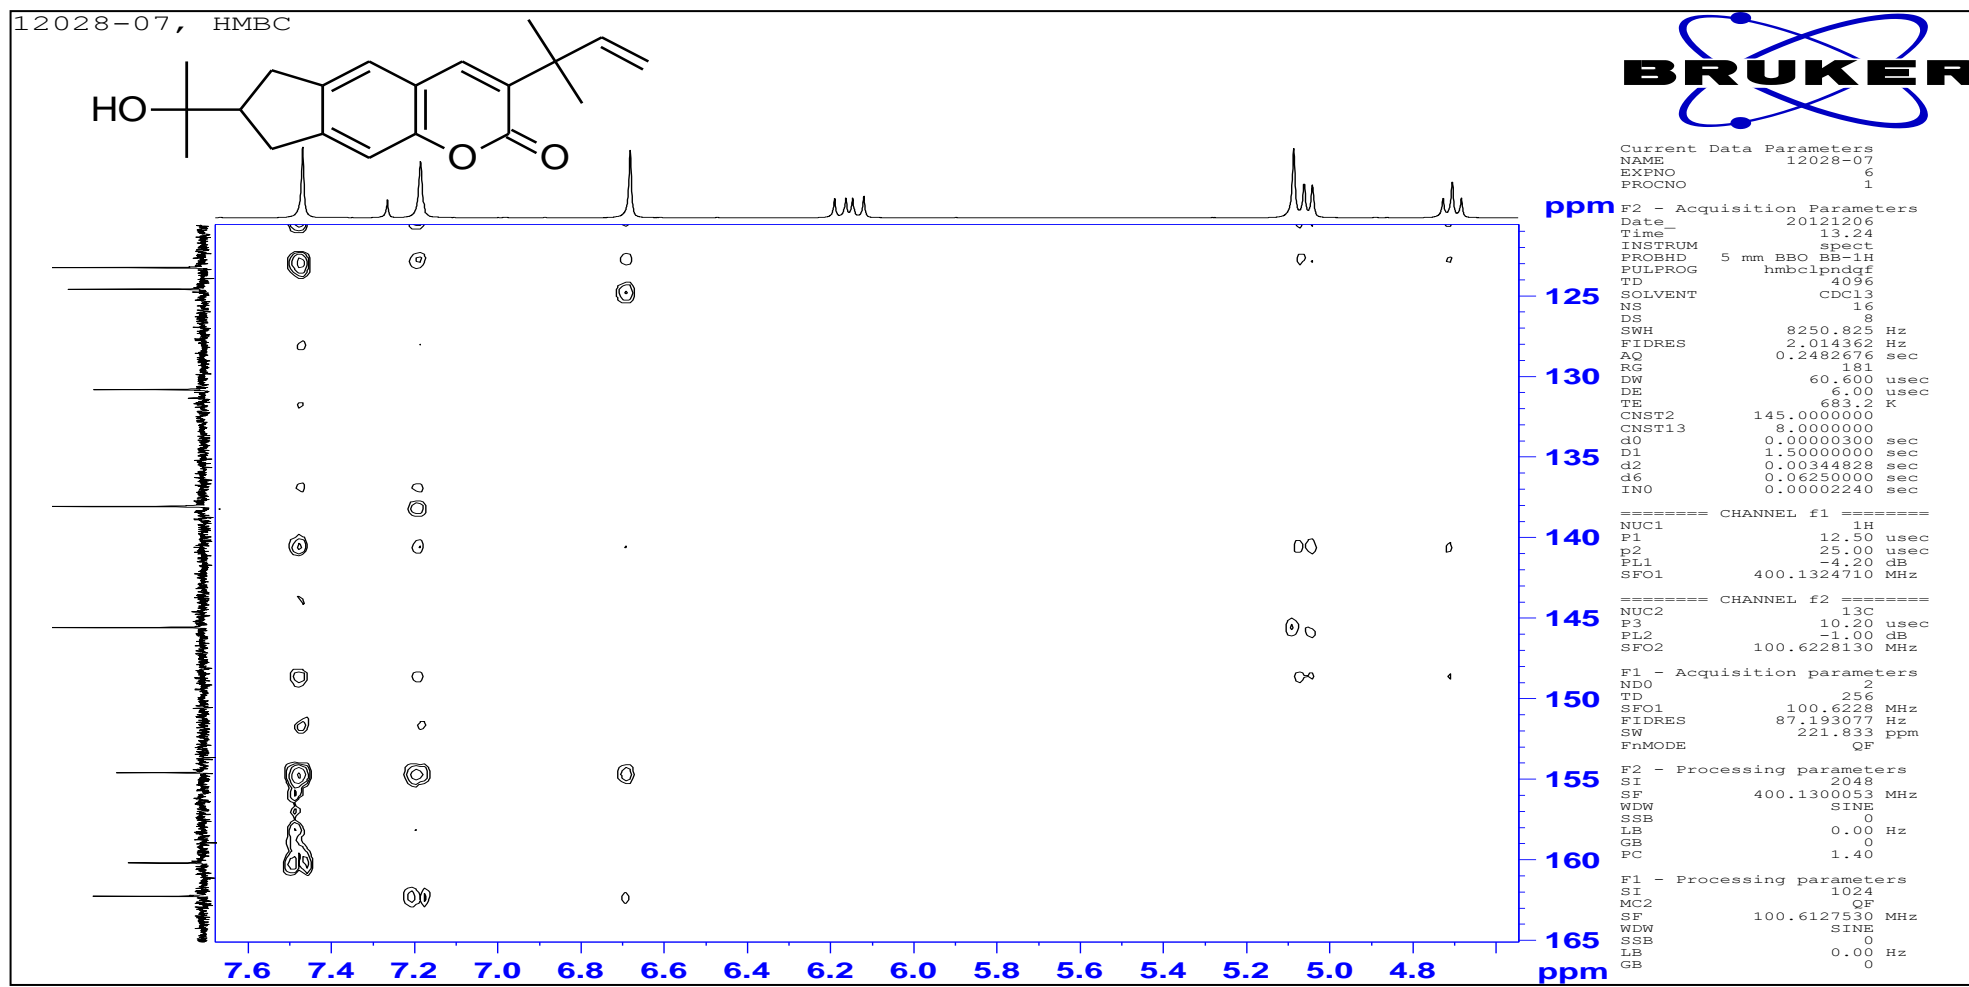

**Figure S36.** Expansion in the area  $^1\text{H}$ : 4.6-7.6 ppm,  $^{13}\text{C}$ : 120-165 ppm. HMBC spectrum of **2**. Obtained by a Bruker Spectrometer Model Advance DPX400, 9.4 Teslas. Operating frequency 400 MHz. ( $\text{CDCl}_3$ ).

Rutamarin (**1**) was recovered as a white amorphous solid (m. p. 104 °C; Lit. 107–109 °C; [1]. Spectroscopy data of this compound corresponded to a previous compound reported as rutamarin, **1** [1]. <sup>1</sup>H-NMR (CDCl<sub>3</sub>, 400.13 MHz) δ: 7.47 (1H, s, H-4), 7.18 (1H, s, H-5), 6.70 (1H, s, H-8), 6.16 (1H, dd, *J* = 17.20, 10.86, 10.85 Hz, H-2''), 5.08 (2H, m, H-3''), 5.04 (1H, m, H-2'), 3.19 (2H, m, H-1'), 1.98 (3H, s, COCH<sub>3</sub>), 1.55 (3H, s, H-5'), 1.50 (3H, s, H-4'), 1.46 (6H, s, H-4'', H-5''). <sup>13</sup>C-NMR (CDCl<sub>3</sub>, 100.61 MHz) δ: 170.3 (C=O), 162.4 (C-7), 160.2 (C-2), 154.7 (C-8a), 145.6 (C-2''), 138.0 (C-4), 130.9 (C-3), 123.9 (C-6), 123.1 (C-5), 113.1 (C-4a), 112.1 (C-3''), 97.1 (C-8), 88.3 (C-2'), 82.2 (C-3'), 49.3 (C-1''), 29.7 (C-1'), 26.1 (C-4'', C-5''), 22.3 (COCH<sub>3</sub>), 21.9 (C-5'), 21.0 (C-4').

Chalepin (**2**) was obtained as a yellow amorphous solid (m. p. 125–126 °C; Lit. 117–118 °C) [2]. Spectroscopy data of this compound corresponded to a previous compound reported as chalepin, **2** [3]. <sup>1</sup>H-RMN (CDCl<sub>3</sub>, 400.13 MHz) δ: 7.47 (1H, s, H-4), 7.18 (1H, s, H-5), 6.8 (1H, s, H-8), 6.15 (1H, dd, *J* = 10.88, 10.86, 17.20, H-2''), 5.07 (2H, m, H-3''), 4.70 (1H, t, H-2'), 3.44 (2H, m, H-1'), 1.94 (1H, s, -OH), 1.45 (6H, s, H-4'', H-5''), 1.35 (3H, s, H-4'), 1.22 (3H, s, H-5'). <sup>13</sup>C-NMR (CDCl<sub>3</sub>, 100.61 MHz) δ: 162.3 (C-7), 160.2 (C-2), 154.6 (C-8a), 145.6 (C-2''), 138.1 (C-4), 130.8 (C-3), 124.6 (C-4a), 123.2 (C-5), 113.11 (C-6), 112.1 (C-3''), 97.1 (C-8), 90.9 (C-2'), 71.7 (C-3'), 40.3 (C-1''), 29.6 (C-1'), 26.1 (C-4'', 5''), 26.0 (C-4'), 24.2 (C-5').

1. Wu, T.S.; Shi, L.S.; Wang, J.J.; Iou, S.C.; Chang, H.C.; Chen, Y.P.; Kuo, Y.H.; Chang, Y.L.; Teng, C.M. Cytotoxic and antiplatelet aggregation principles of *Ruta graveolens*. *J. Chinese Chem. Soc.* **2003**, *50*, 171–178.
2. Ezmirly, S.T.; Wilson, S.R. Saudi Arabian medicinal plants I: *Ruta Chalepensis*. *J. Chem.* **1980**, *2*, 55–57.
3. Richardson, J.S.M.; Sethi, G.; Lee, G.S.; Malek, S.N.A. Chalepin: Isolated from *Ruta angustifolia* L. Pers induces mitochondrial mediated apoptosis in lung carcinoma cells. *BMC Complement. Altern. Med.* **2016**, *16*:389, 1–27.

**Figure S37.** NMR Data of Rutamarin (**1**) and Chalepin (**2**)

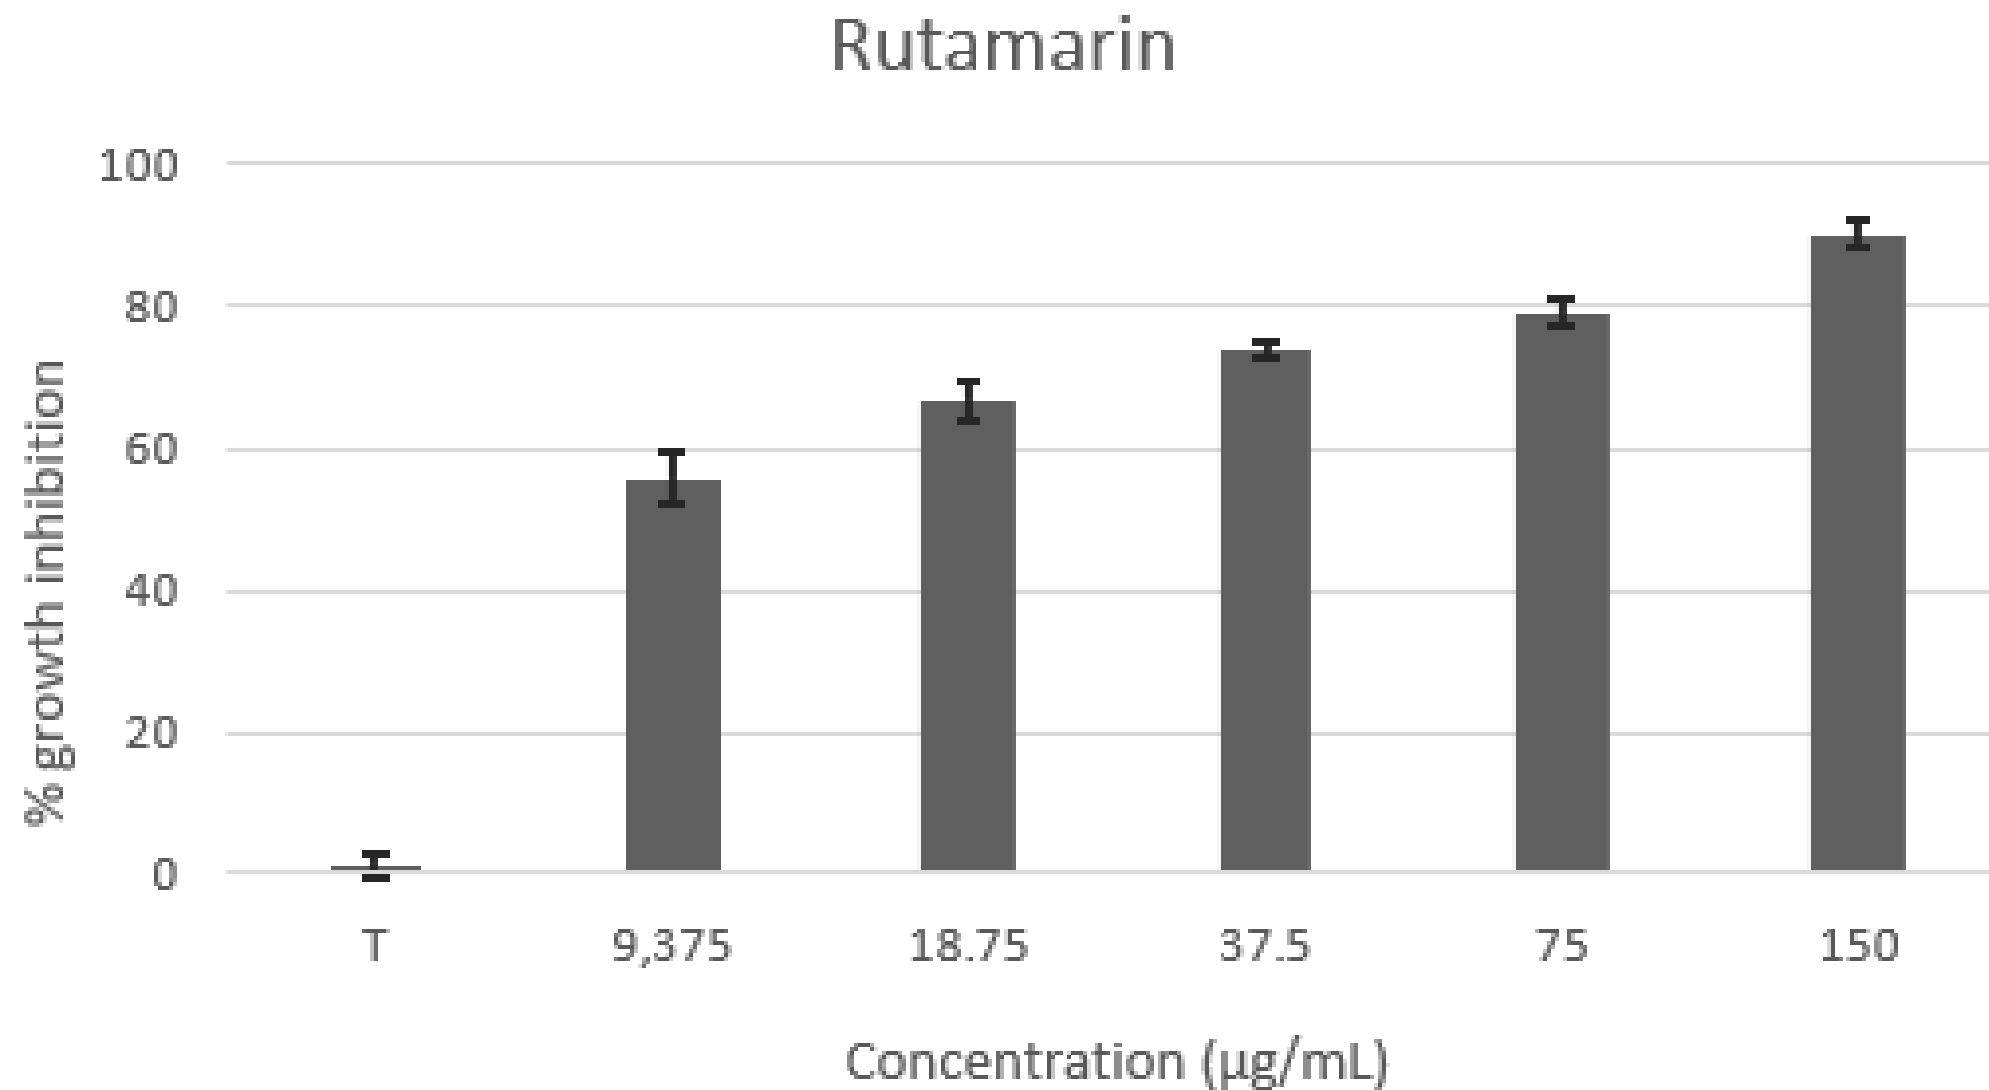

**Figure S38.** Antiprotozoal activity of Rutamarin (1) against trophozoite of *E. histolytica*. T = negative control consisting of culture medium and parasites.

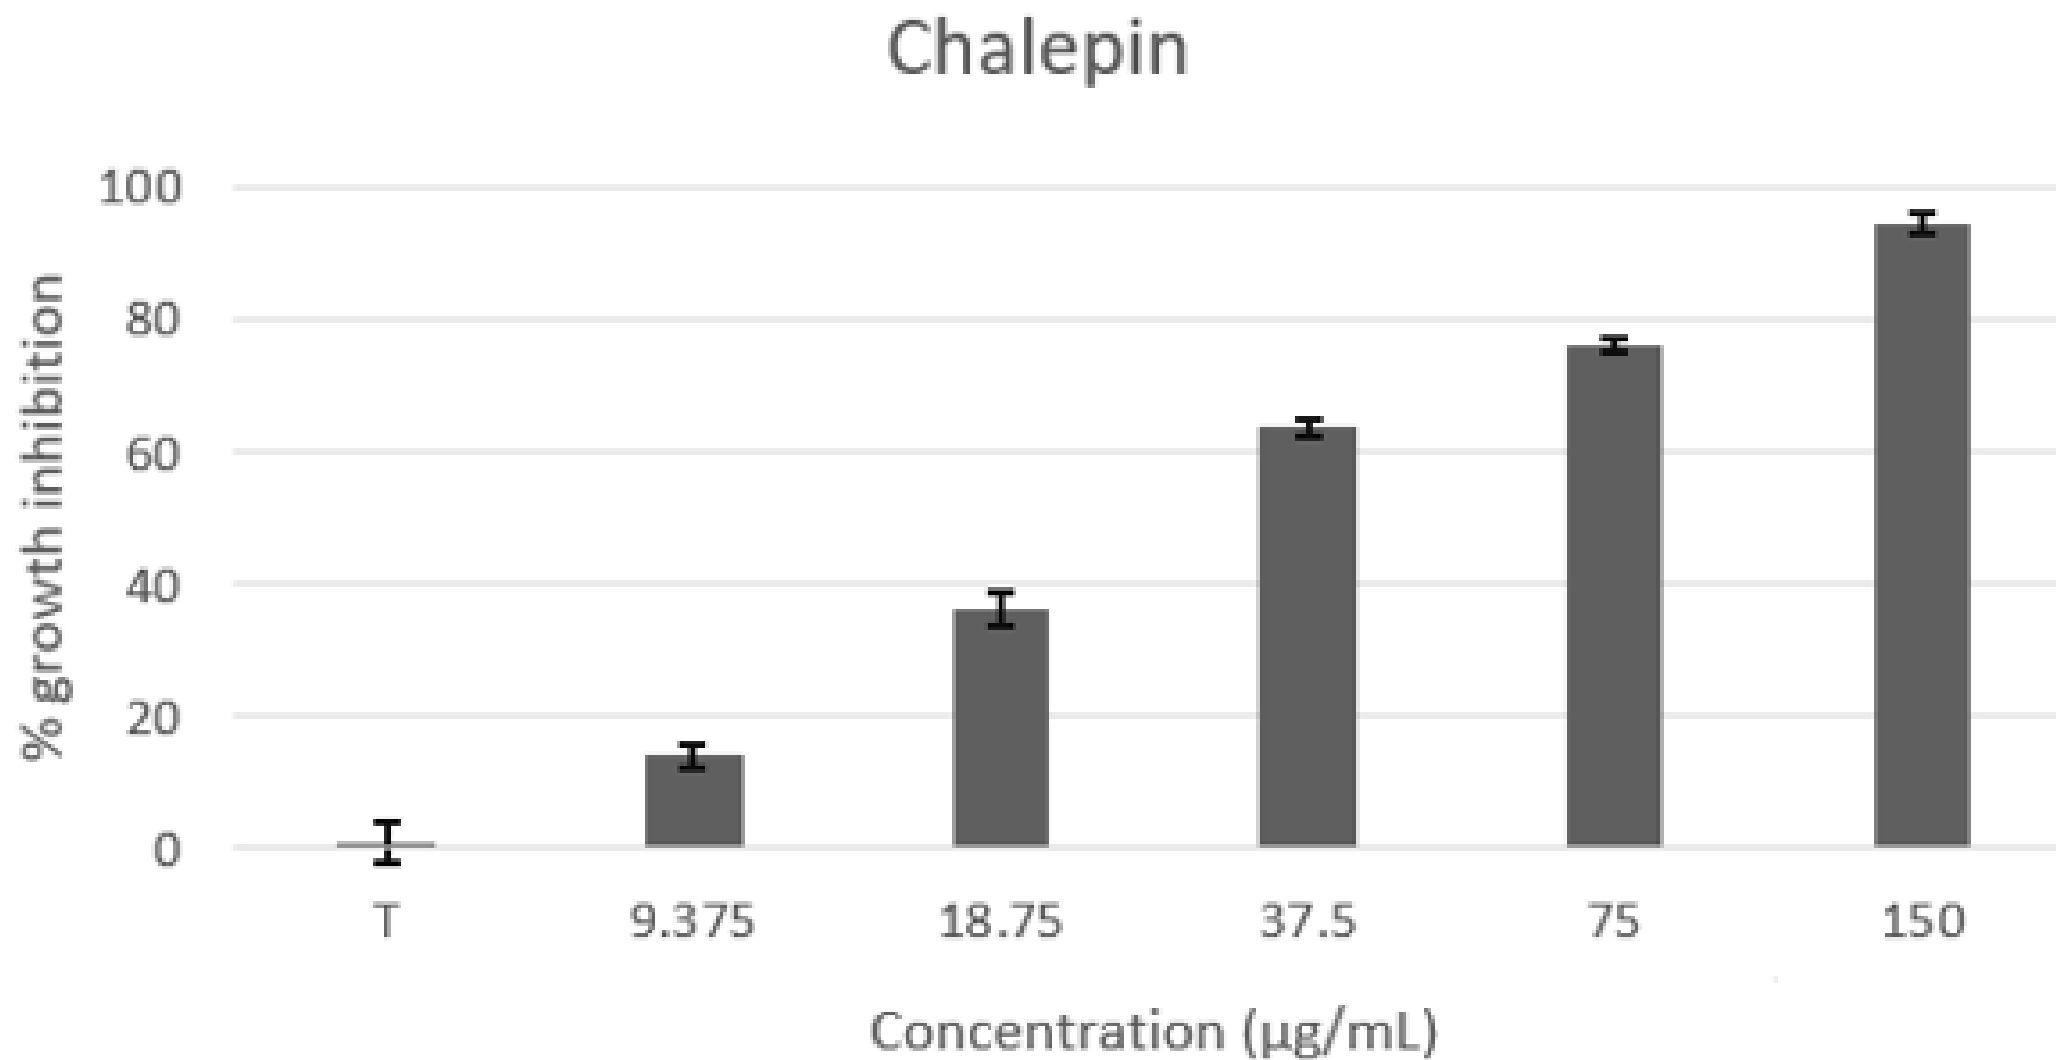

**Figure S39.** Antiprotozoal activity of Chalepin) (**2**) against trophozoite of *E. histolytica*. T = negative control consisting of culture medium and parasites.



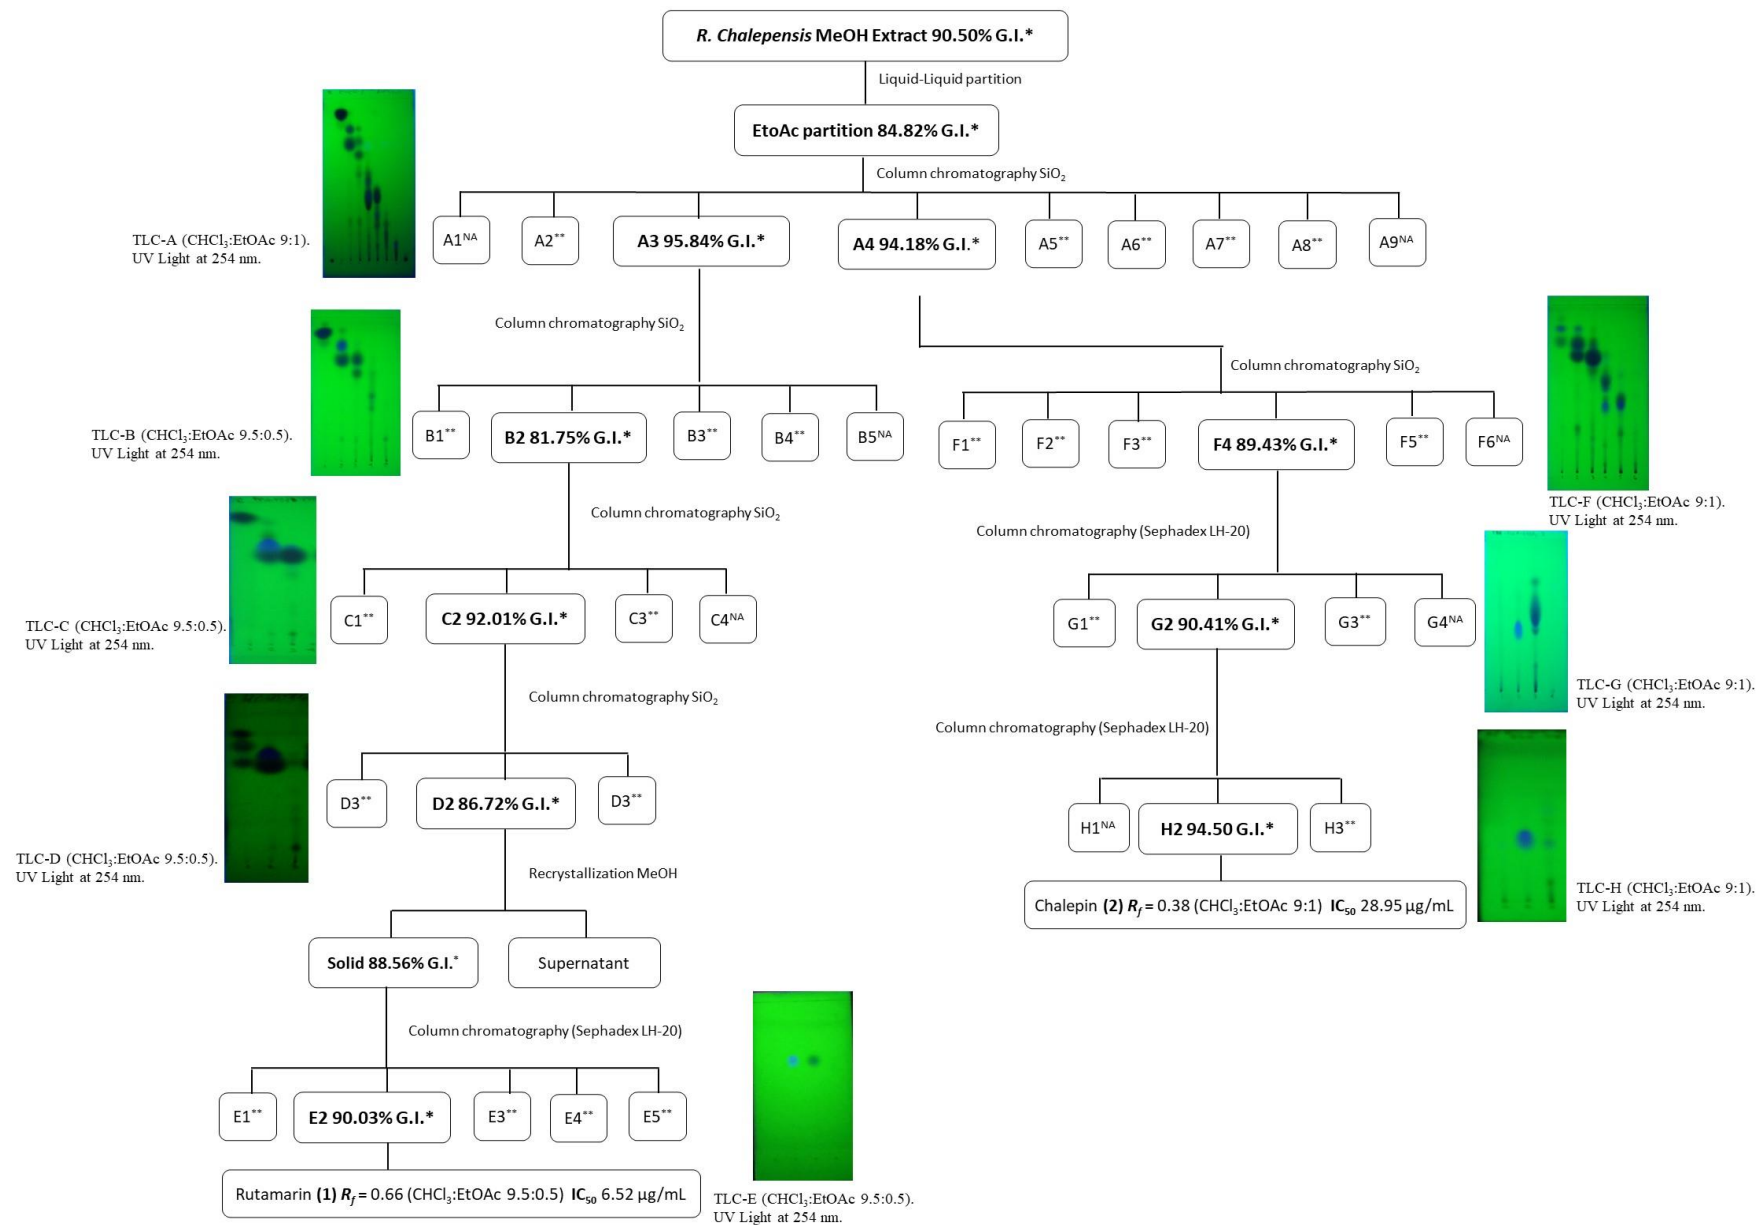

\* Growth inhibition on *E. histolytica* at 150 µg/mL. \*\*Growth inhibition on *E. histolytica* less than 50% at 150 µg/mL. <sup>NA</sup> No amebicide activity

**Figure S40. General scheme for the bioguided isolation of compounds with antiamoebic activity from *Ruta chalepensis***
